# Supplementary material for: Defining the function of OmpA in the Rcs stress response
Source: eLife journal article supplement (doi:10.7554/elife.60861), 2020-09-28
Supplement: supp [file elife-60861-supp-v1.zip]

Archive with 16 entries (16 files):
- elife_poa_e60861_Supplementary_file_1.docx
- elife_poa_e60861_Supplementary_file_2.docx
- elife_poa_e60861_Supplementary_file_3.docx
- elife_poa_e60861_Figure_1_figure_supplement_1.pdf
- elife_poa_e60861_Figure_1_figure_supplement_2.pdf
- elife_poa_e60861_Figure_3_figure_supplement_1.pdf
- elife_poa_e60861_Figure_3_figure_supplement_2.pdf
- elife_poa_e60861_Figure_5_figure_supplement_1.pdf
- elife_poa_e60861_Figure_6_figure_supplement_1.pdf
- elife_poa_e60861_Figure_6_figure_supplement_2.pdf
- elife_poa_e60861_Figure_3_source_data_1.xlsx
- elife_poa_e60861_Figure_4_source_data_1.xlsx
- elife_poa_e60861_Figure_5_source_data_1.xlsx
- elife_poa_e60861_Figure_5_source_data_2.xlsx
- elife_poa_e60861_Figure_6_figure_supplement_1_source_data_1.xlsx
- elife_poa_e60861_Transparent_Reporting_File.pdf
