# Supplementary material for: Defining the function of OmpA in the Rcs stress response
Source: eLife journal article supplement (doi:10.7554/elife.60861), 2020-09-28
Supplement: supp [file elife-60861-supp-v1.zip › elife_poa_e60861_Figure_3_source_data_1.xlsx]

## Sheet: WT-OmpA-OmpANter
MOPS	OD600	A420		MOPS	Average	SD
WT	0.55	0.0783	284.727
WT	0.49	0.0817	333.469
WT	0.5	0.0905	362	WT	326.732	39.0744
OmpA-	0.48	0.5878	2449.17
OmpA-	0.49	0.5239	2138.37
∆ompA	0.51	0.7005	2747.06	∆ompA	2444.86	304.369
OmpANter	0.42	0.4123	1963.33
OmpANter	0.57	0.4115	1443.86
OmpANter	0.51	0.3696	1449.41	OmpANter	1618.87	298.328
pvalue
WT vs. ∆ompA	0.00613761
WT vs. OmpANter	0.0160175
∆ompA vs OmpANter	0.0284049

## Sheet: WT-OmpA-OmpAX
MOPS	OD600	A420		MOPS	Average	SD
WT	0.55	0.0783	284.727
WT	0.49	0.0817	333.469
WT	0.5	0.0905	362	WT	326.732	39.0744
OmpA-	0.48	0.5878	2449.17
OmpA-	0.49	0.5239	2138.37
∆ompA	0.51	0.7005	2747.06	∆ompA	2444.86	304.369
OmpAX	0.57	0.0808	283.509
OmpAX	0.52	0.0813	312.692
OmpAX	0.64	0.0842	263.125	OmpAX	286.442	24.9135
pvalue
WT vs. ∆ompA	0.00613761
WT vs. OmpAX	0.218779
∆ompA vs OmpAX	0.00628581

## Sheet: WT-OmpA-OmpApal
MOPS	OD600	Vmax		Average	SD
WT/empty vector	0.48	0.001689	175.938
		0.001438	149.792
		0.001537	160.104	161.944	13.1697
ΔompA/empty vector	0.6075	0.0176	1448.56
		0.0161	1325.1
		0.0156	1283.95	1352.54	85.6653
ΔompA/pOmpApal	0.46	0.003845	417.935
		0.003764	409.13
		0.003661	397.935	408.333	10.0238
pvalue
WT/empty vector vs. ΔompA/empty vector	0.00139063
WT/empty vector vs. ΔompA/pOmpApal	2.4021e-05
ΔompA/empty vector vs. ΔompA/pOmpApal	0.00244411

## Sheet: Relative-WT_OmpA_OmpANter
MOPS	OD600	A420		MOPS	Average	SD		Relative Average	relative SD
WT	0.55	0.0783	284.727				0.871439
WT	0.49	0.0817	333.469				1.02062
WT	0.5	0.0905	362	WT	326.732	39.0744	1.10794	1	0.119592
OmpA-	0.48	0.5878	2449.17				7.49594
OmpA-	0.49	0.5239	2138.37				6.54471
∆ompA	0.51	0.7005	2747.06	∆ompA	2444.86	304.369	8.40768	7.48278	0.931554
OmpANter	0.42	0.4123	1963.33				6.009
OmpANter	0.57	0.4115	1443.86				4.41909
OmpANter	0.51	0.3696	1449.41	OmpANter	1618.87	298.328	4.43608	4.95472	0.913067
pvalue							pvalue relative
WT vs. ∆ompA	0.00613761						WT vs. ∆ompA	0.00613761
WT vs. OmpANter	0.0160175						WT vs. OmpANter	0.0160175
∆ompA vs OmpANter	0.0284049						∆ompA vs OmpANter	0.0284049

## Sheet: Relative-WT_OmpA_OmPAX
MOPS	OD600	A420		MOPS	Average	SD		Relative Average	relative SD
WT	0.55	0.0783	284.727				0.871439
WT	0.49	0.0817	333.469				1.02062
WT	0.5	0.0905	362	WT	326.732	39.0744	1.10794	1	0.119592
OmpA-	0.48	0.5878	2449.17				7.49594
OmpA-	0.49	0.5239	2138.37				6.54471
∆ompA	0.51	0.7005	2747.06	∆ompA	2444.86	304.369	8.40768	7.48278	0.931554
OmpAX	0.57	0.0808	283.509				0.86771
OmpAX	0.52	0.0813	312.692				0.957029
OmpAX	0.64	0.0842	263.125	OmpAX	286.442	24.9135	0.805323	0.876687	0.0762505
pvalue							pvalue relative
WT vs. ∆ompA	0.00613761						WT vs. ∆ompA	0.00613761
WT vs. OmpAX	0.218779						WT vs. OmpAX	0.218779
∆ompA vs OmpAX	0.00628581						∆ompA vs OmpAX	0.00628581

## Sheet: Relative-WT_OmpA_OmpApal
MOPS	OD600	Vmax		Average	SD		Relative Average	relative SD
WT/empty vector	0.48	0.001689	175.938			1.08641
		0.001438	149.792			0.924957
		0.001537	160.104	161.944	13.1697	0.988636	1	0.0813224
ΔompA/empty vector	0.6075	0.0176	1448.56			8.94479
		0.0161	1325.1			8.18245
		0.0156	1283.95	1352.54	85.6653	7.92834	8.35186	0.528979
ΔompA/pOmpApal	0.46	0.003845	417.935			2.58073
		0.003764	409.13			2.52636
		0.003661	397.935	408.333	10.0238	2.45723	2.52144	0.0618965
						pvalue relative
						WT/empty vector vs. ΔompA/empty vector	0.00139063
pvalue						WT/empty vector vs. ΔompA/pOmpApal	2.4021e-05
WT/empty vector vs. ΔompA/empty vector	0.00139063					ΔompA/empty vector vs. ΔompA/pOmpApal	0.00244411
WT/empty vector vs. ΔompA/pOmpApal	2.4021e-05
ΔompA/empty vector vs. ΔompA/pOmpApal	0.00244411
