# Supplementary material for: Defining the function of OmpA in the Rcs stress response
Source: eLife journal article supplement (doi:10.7554/elife.60861), 2020-09-28
Supplement: supp [file elife-60861-supp-v1.zip › elife_poa_e60861_Figure_4_source_data_1.xlsx]

## Sheet: Reference
	#	Assign F1	Assign F2	Pos F1	Pos F2	LW F1 (Hz)	LW F2 (Hz)	Height	Volume	Merit	Comment
0	1	Omp.277.ARG.H	Omp.277.ARG.N	8.9899	119.727	21.0293	12.9097	97494280	2.85507e+06	1
1	2	Omp.276.ALA.H	Omp.276.ALA.N	8.66338	123.052	27.8365	26.6033	65249808	1.49782e+06	1
2	3	Omp.234.VAL.H	Omp.234.VAL.N	9.0147	122.055	22.5414	11.7241	108511640	3225005	1
3	4	Omp.227.LEU.H	Omp.227.LEU.N	7.49731	121.376	17.3261	11.9319	164272160	1.32126e+06	1
4	5	Omp.257.ALA.H	Omp.257.ALA.N	8.03809	121.15	21.1343	14.1517	83768616	-10003.3	1
5	6	Omp.282.SER.H	Omp.282.SER.N	7.93684	115.511	21.5559	12.2352	100966216	1.56162e+06	1
6	7	Omp.315.GLY.H	Omp.315.GLY.N	8.41761	108.267	22.2939	11.9465	96692808	2.83926e+06	1
7	8	Omp.251.GLY.H	Omp.251.GLY.N	7.79779	108.085	34.7917	16.1254	12456383	378679	1
8	9	Omp.263.TYR.H	Omp.263.TYR.N	7.98294	121.736	20.5635	12.1785	100542360	2.94405e+06	1
9	10	Omp.312.GLU.H	Omp.312.GLU.N	9.34396	128.014	19.6375	12.5579	85061096	2.48425e+06	1
10	11	Omp.235.VAL.H	Omp.235.VAL.N	9.21412	129.76	21.5947	11.2898	110573056	3.25863e+06	1
11	12	Omp.220.LEU.H	Omp.220.LEU.N	7.74124	121.599	19.6767	11.7843	97719448	2.84113e+06	1
12	13	Omp.266.SER.H	Omp.266.SER.N	7.83194	118.888	0	0	None	3.22759e+06	1
13	14	Omp.221.TYR.H	Omp.221.TYR.N	8.81712	119.408	19.5002	12.2843	92042904	2.60642e+06	1
14	15	Omp.301.ASP.H	Omp.301.ASP.N	7.46975	119.287	19.3961	12.1538	91317624	2.68036e+06	1
15	16	Omp.250.GLN.H	Omp.250.GLN.N	8.65516	122.582	21.9356	14.732	109689624	295402	1
16	17	Omp.196.LEU.H	Omp.196.LEU.N	9.35393	127.657	22.529	14.3041	76178272	2.32471e+06	1
17	18	Omp.210.LYS.H	Omp.210.LYS.N	8.46138	123.692	21.1695	13.2562	86577544	2.573e+06	1
18	19	Omp.208.THR.H	Omp.208.THR.N	7.17729	109.986	21.2355	12.0261	117342456	3.41385e+06	1
19	20	Omp.314.LYS.H	Omp.314.LYS.N	9.07304	128.118	22.0392	12.6624	88180616	2.6291e+06	1
20	21	Omp.203.ASN.H	Omp.203.ASN.N	8.49209	119.61	28.1976	12.8407	107077104	3.08156e+06	1
21	22	Omp.294.LYS.H	Omp.294.LYS.N	8.34792	125.048	24.3076	22.351	28860582	3.48252e+06	1
22	23	Omp.230.LYS.H	Omp.230.LYS.N	8.20557	118.294	21.5102	12.0071	134083408	3.96478e+06	1
23	24	Omp.226.ASN.H	Omp.226.ASN.N	8.18029	119.828	21.5339	12.6145	141754480	17613.1	1
24	25	Omp.202.PHE.H	Omp.202.PHE.N	7.77188	111.371	21.825	12.0587	76221872	2.24989e+06	1
25	26	Omp.214.GLN.H	Omp.214.GLN.N	7.79955	121.377	19.3219	14.3371	67829928	1.97914e+06	1
26	27	Omp.311.ILE.H	Omp.311.ILE.N	9.37289	122.772	22.4283	11.873	79278200	2.33942e+06	1
27	28	Omp.316.ILE.H	Omp.316.ILE.N	7.94005	119.512	0	12.34	118117544	457568	1
28	29	Omp.288.ASN.H	Omp.288.ASN.N	9.05556	126.917	25.4816	15.0551	38220908	1.20793e+06	1
29	30	Omp.205.ASN.H	Omp.205.ASN.N	8.58503	114.51	21.4959	12.8707	114762960	3443323	1
30	31	Omp.238.GLY.H	Omp.238.GLY.N	8.58209	108.233	22.6535	12.0524	73204200	2.15522e+06	1
31	32	Omp.245.SER.H	Omp.245.SER.N	8.30773	115.138	22.1494	11.6177	71175288	2.10858e+06	1
32	33	Omp.304.ALA.H	Omp.304.ALA.N	7.32171	122.994	18.2161	12.1969	91229880	2.58945e+06	1
33	34	Omp.239.TYR.H	Omp.239.TYR.N	8.54328	122.338	21.6824	13.5609	72525656	969189	1
34	35	Omp.213.GLY.H	Omp.213.GLY.N	7.60568	110.394	22.6967	12.5214	79236968	2.38333e+06	1
35	36	Omp.264.LEU.H	Omp.264.LEU.N	8.51499	120.594	21.857	16.4927	70765280	2.15462e+06	1
36	37	Omp.248.TYR.H	Omp.248.TYR.N	7.81778	120.742	30.3625	12.7214	105085464	3.18413e+06	1
37	38	Omp.292.ASN.H	Omp.292.ASN.N	8.68949	121.567	25.7616	17.3455	21156760	3403.89	1
38	39	Omp.200.VAL.H	Omp.200.VAL.N	6.85445	116.795	21.6764	12.1384	70573880	2.11571e+06	1
39	40	Omp.298.ALA.H	Omp.298.ALA.N	7.04929	119.101	19.6664	12.1873	116297888	3.42981e+06	1
40	41	Omp.269.ILE.H	Omp.269.ILE.N	8.04145	125.141	20.2504	11.9641	96698112	2.77207e+06	1
41	42	Omp.219.GLN.H	Omp.219.GLN.N	7.69679	119.793	19.0942	12.2583	103602768	2.93773e+06	1
42	43	Omp.209.LEU.H	Omp.209.LEU.N	8.8321	124.678	19.4624	12.8093	101860464	156038	1
43	44	Omp.285.VAL.H	Omp.285.VAL.N	8.54679	124.648	23.3801	12.9789	54643592	1.6315e+06	1
44	45	Omp.290.CYS.H	Omp.290.CYS.N	8.5231	117.36	21.3798	12.4004	210705616	1.5618e+06	1
45	46	Omp.225.SER.H	Omp.225.SER.N	7.19035	112.304	18.1333	12.5086	135250496	3.82339e+06	1
46	47	Omp.293.VAL.H	Omp.293.VAL.N	7.37765	122.737	20.3181	11.262	130510936	3.78463e+06	1
47	48	Omp.256.ARG.H	Omp.256.ARG.N	8.49209	119.61	28.1976	12.8407	107077104	996686	1
48	49	Omp.280.GLY.H	Omp.280.GLY.N	8.67604	110.666	23.1682	12.118	55442532	1.65885e+06	1
49	50	Omp.303.LEU.H	Omp.303.LEU.N	8.05853	114.816	20.6791	13.2511	67455528	2.01524e+06	1
50	51	Omp.198.SER.H	Omp.198.SER.N	8.64451	123.202	21.9617	14.1072	101387872	501003	1
51	52	Omp.194.PHE.H	Omp.194.PHE.N	9.07206	122.349	21.3677	13.4807	71735744	2.15697e+06	1
52	53	Omp.204.PHE.H	Omp.204.PHE.N	7.46703	120.513	18.2965	12.3028	102019416	2.96542e+06	1
53	54	Omp.302.CYS.H	Omp.302.CYS.N	8.41083	122.597	28.1924	14.3584	101241704	-1789.48	1
54	55	Omp.322.GLN.H	Omp.322.GLN.N	8.39049	124.235	18.1167	11.473	344763648	9.82188e+06	1
55	56	Omp.192.LYS.H	Omp.192.LYS.N	8.96994	124.019	21.8747	12.1039	104913640	153417	1
56	57	Omp.240.THR.H	Omp.240.THR.N	8.71281	112.947	22.2857	12.4247	62716840	119374	1
57	58	Omp.190.GLN.H	Omp.190.GLN.N	8.76285	124.443	20.2229	12.7617	121040528	1.3769e+06	1
58	59	Omp.195.THR.H	Omp.195.THR.N	8.8942	118.932	21.59	11.5097	109150456	3.20345e+06	1
59	60	Omp.217.LEU.H	Omp.217.LEU.N	7.90689	119.506	21.8431	12.2418	220440944	3.79376e+06	1
60	61	Omp.278.GLY.H	Omp.278.GLY.N	9.30304	112.545	21.3205	11.9273	83452120	2.4349e+06	1
61	62	Omp.241.ASP.H	Omp.241.ASP.N	7.07316	114.921	19.9742	14.8666	22103838	677668	1
62	63	Omp.295.GLN.H	Omp.295.GLN.N	7.74758	120.327	20.1304	11.8355	169397216	4.90063e+06	1
63	64	Omp.286.THR.H	Omp.286.THR.N	10.149	113.233	24.732	12.3116	57074808	88256.6	1
64	65	Omp.237.LEU.H	Omp.237.LEU.N	9.71204	127.806	22.2612	12.1789	78994920	2.31079e+06	1
65	66	Omp.321.THR.H	Omp.321.THR.N	8.3075	119.318	19.1076	0	326383360	95544.3	1
66	67	Omp.244.GLY.H	Omp.244.GLY.N	8.51065	114.276	23.2083	12.2588	70845080	211982	1
67	68	Omp.267.LYS.H	Omp.267.LYS.N	7.15904	119.46	21.8705	12.1303	94704016	2.83996e+06	1
68	69	Omp.228.ASP.H	Omp.228.ASP.N	8.87222	127.534	20.8945	12.3478	92982272	299311	1
69	70	Omp.271.ALA.H	Omp.271.ALA.N	8.66876	125.177	18.7879	15.8531	107305936	108156	1
70	71	Omp.259.SER.H	Omp.259.SER.N	8.35526	116.467	18.8092	12.1126	121644448	3.54833e+06	1
71	72	Omp.252.LEU.H	Omp.252.LEU.N	8.2768	122.911	23.2619	15.4827	46851824	1.02484e+06	1
72	73	Omp.274.ILE.H	Omp.274.ILE.N	7.32711	116.725	20.6951	11.644	121972104	3.56195e+06	1
73	74	Omp.325.ALA.H	Omp.325.ALA.N	8.0169	131.556	17.354	11.6062	185125280	32110.5	1
74	75	Omp.218.ASP.H	Omp.218.ASP.N	8.97382	123.522	17.9178	13.5716	97883888	2.79498e+06	1
75	76	Omp.231.ASP.H	Omp.231.ASP.N	8.5231	117.36	21.3798	12.4004	210705616	568981	1
76	77	Omp.246.ASP.H	Omp.246.ASP.N	8.80577	125.432	20.0052	14.6771	50841096	74696.3	1
77	78	Omp.268.GLY.H	Omp.268.GLY.N	7.36316	102.934	21.5484	11.9245	72283552	2.15419e+06	1
78	79	Omp.297.ALA.H	Omp.297.ALA.N	8.61737	120.707	19.4128	12.3293	176089408	188991	1
79	80	Omp.232.GLY.H	Omp.232.GLY.N	7.99472	109.146	20.8008	11.6012	108262144	3.13548e+06	1
80	81	Omp.320.VAL.H	Omp.320.VAL.N	8.30251	124.615	20.6107	12.3597	261833632	854066	1
81	82	Omp.191.THR.H	Omp.191.THR.N	8.2602	116.839	22.6592	12.5894	113538528	3.33153e+06	1
82	83	Omp.236.VAL.H	Omp.236.VAL.N	8.79711	127.648	21.9166	11.918	92674040	1.24652e+06	1
83	84	Omp.310.GLU.H	Omp.310.GLU.N	9.6316	125.656	22.9867	12.1783	57929288	1.71727e+06	1
84	85	Omp.299.LEU.H	Omp.299.LEU.N	8.67248	124.792	19.8149	15.8728	84067968	2.5368e+06	1
85	86	Omp.258.GLN.H	Omp.258.GLN.N	8.48477	117.174	19.5096	11.8748	96998736	1.0374e+06	1
86	87	Omp.272.ASP.H	Omp.272.ASP.N	8.47075	110.914	19.5339	11.8107	125500176	3.66142e+06	1
87	88	Omp.307.ARG.H	Omp.307.ARG.N	7.56604	117.232	21.3541	13.6289	59368244	1.78215e+06	1
88	89	Omp.233.SER.H	Omp.233.SER.N	8.64067	116.106	20.7714	12.012	102230936	2.97117e+06	1
89	90	Omp.324.GLN.H	Omp.324.GLN.N	8.53893	121.463	18.008	14.3169	176549088	3.12608e+06	1
90	91	Omp.260.VAL.H	Omp.260.VAL.N	7.62646	121.278	19.9533	11.5458	100312312	2.8933e+06	1
91	92	Omp.309.VAL.H	Omp.309.VAL.N	9.00935	118.933	21.3133	12.7418	80392808	2.3972e+06	1
92	93	Omp.287.GLY.H	Omp.287.GLY.N	7.29851	110.157	20.8646	12.2551	96134608	2.77591e+06	1
93	94	Omp.313.VAL.H	Omp.313.VAL.N	9.15048	126.571	21.6721	12.2815	78675088	2.3486e+06	1
94	95	Omp.279.MET.H	Omp.279.MET.N	8.89338	123.596	23.0171	14.0527	58442412	1.76385e+06	1
95	96	Omp.319.VAL.H	Omp.319.VAL.N	8.1804	120.857	0	0	None	83697.6	1
96	97	Omp.222.SER.H	Omp.222.SER.N	7.78441	113.321	18.6701	12.761	125562280	3.62344e+06	1
97	98	Omp.281.GLU.H	Omp.281.GLU.N	8.65516	122.582	21.9356	14.732	109689624	754241	1
98	99	Omp.199.ASP.H	Omp.199.ASP.N	9.08515	118.445	19.6393	12.9594	90016288	2.66002e+06	1
99	100	Omp.189.VAL.H	Omp.189.VAL.N	8.24712	121.404	22.1334	21.1677	6.18187e+06	97308.5	1
100	101	Omp.254.GLU.H	Omp.254.GLU.N	7.61131	125.141	20.5799	12.2359	82941024	2.41155e+06	1
101	102	Omp.216.ALA.H	Omp.216.ALA.N	7.52118	120.992	18.0091	12.3913	122884440	3.4965e+06	1
102	103	Omp.197.LYS.H	Omp.197.LYS.N	8.85761	122.315	19.8885	12.344	101113048	2.9565e+06	1
103	104	Omp.317.LYS.H	Omp.317.LYS.N	8.19013	127.069	19.817	12.226	140439152	4.03323e+06	1
104	105	Omp.212.GLU.H	Omp.212.GLU.N	10.052	118.053	18.7541	12.1831	112789824	3.27993e+06	1
105	106	Omp.247.ALA.H	Omp.247.ALA.N	8.43951	122.961	20.9781	15.169	79684576	64645.7	1
106	107	Omp.318.ASP.H	Omp.318.ASP.N	8.38347	122.637	19.9478	11.9875	230549376	2.0412e+06	1
107	108	Omp.283.ASN.H	Omp.283.ASN.N	8.94598	114.446	23.0804	12.7786	68411096	14246.6	1
108	109	Omp.253.SER.H	Omp.253.SER.N	8.44376	114.358	27.1385	13.8755	16914078	315110	1
109	110	Omp.275.SER.H	Omp.275.SER.N	7.92965	118.257	22.1629	12.3492	93351792	2.77963e+06	1
110	111	Omp.306.ASP.H	Omp.306.ASP.N	8.04337	112.465	20.1767	12.8296	78236552	2.2964e+06	1
111	112	Omp.265.ILE.H	Omp.265.ILE.N	9.0931	122.67	20.4913	12.0467	94086360	2.71812e+06	1
112	113	Omp.223.GLN.H	Omp.223.GLN.N	7.65514	118.647	20.2801	12.1481	99219360	2.93627e+06	1
113	114	Omp.201.LEU.H	Omp.201.LEU.N	6.90423	115.332	19.6479	12.5444	71930832	2.0907e+06	1
114	115	Omp.193.HIS.H	Omp.193.HIS.N	8.24571	120.71	22.8247	12.1387	103892304	18869	1
115	116	Omp.224.LEU.H	Omp.224.LEU.N	7.57756	117.927	20.3876	12.8135	99884888	2.92745e+06	1
116	117	Omp.249.ASN.H	Omp.249.ASN.N	8.64769	119.6	19.5143	12.9027	154226128	4.55873e+06	1
117	118	Omp.261.VAL.H	Omp.261.VAL.N	8.09789	120.944	17.9348	13.6693	83093592	2.41915e+06	1
118	119	Omp.255.ARG.H	Omp.255.ARG.N	8.10655	118.787	21.5654	14.9766	70610144	2.16789e+06	1
119	120	Omp.289.THR.H	Omp.289.THR.N	8.58544	115.367	18.7856	12.3162	133048632	3.80576e+06	1
120	121	Omp.300.ILE.H	Omp.300.ILE.N	8.28947	119.189	19.1076	11.7769	324824416	3.19531e+06	1
121	122	Omp.215.ALA.H	Omp.215.ALA.N	7.80266	119.028	18.909	12.263	105243560	3.03393e+06	1
122	123	Omp.291.ASP.H	Omp.291.ASP.N	8.61201	122.111	19.932	12.7793	99966896	-52659	1
123	124	Omp.262.ASP.H	Omp.262.ASP.N	9.24946	119.115	18.6922	12.6831	100347480	2.90377e+06	1
124	125	Omp.273.LYS.H	Omp.273.LYS.N	7.8711	117.43	21.2261	12.6121	188237792	3.87286e+06	1
125	126	Omp.296.ARG.H	Omp.296.ARG.N	8.72996	126.63	22.144	12.9478	76031576	14370.6	1
126	127	Omp.308.ARG.H	Omp.308.ARG.N	7.74592	124.346	22.1132	12.1088	65765072	1.96494e+06	1
127	128			8.03853	121.154	None	None	8.25297e+07	None	1

## Sheet: 30 eq
	#	Assign F1	Assign F2	Pos F1	Pos F2	LW F1 (Hz)	LW F2 (Hz)	Height	Volume	Merit	Comment
0	1	Omp.277.ARG.H	Omp.277.ARG.N	8.98919	119.719	22.007	12.7238	101873608	2.85507e+06	1
1	2	Omp.276.ALA.H	Omp.276.ALA.N	8.66404	123.045	28.8411	24.3744	65100520	1.49782e+06	1
2	3	Omp.234.VAL.H	Omp.234.VAL.N	9.01439	122.052	21.943	11.8274	113452544	3225005	1
3	4	Omp.227.LEU.H	Omp.227.LEU.N	7.49631	121.374	17.8871	12.0556	171112912	1.32126e+06	1
4	5	Omp.257.ALA.H	Omp.257.ALA.N	8.03937	121.143	20.7424	13.3529	93665520	-10003.3	1
5	6	Omp.282.SER.H	Omp.282.SER.N	7.93517	115.511	22.9529	12.3969	102000888	1.56162e+06	1
6	7	Omp.315.GLY.H	Omp.315.GLY.N	8.41604	108.265	21.7161	11.8621	105102512	2.83926e+06	1
7	8	Omp.251.GLY.H	Omp.251.GLY.N	7.80522	108.103	27.8027	14.9974	16122086	378679	1
8	9	Omp.263.TYR.H	Omp.263.TYR.N	7.98184	121.737	19.7534	11.6715	108477312	2.94405e+06	1
9	10	Omp.312.GLU.H	Omp.312.GLU.N	9.34317	128.015	21.8251	13.5477	82138368	2.48425e+06	1
10	11	Omp.235.VAL.H	Omp.235.VAL.N	9.21362	129.761	21.789	11.6698	110157160	3.25863e+06	1
11	12	Omp.220.LEU.H	Omp.220.LEU.N	7.7401	121.6	19.0971	12.1995	99222080	2.84113e+06	1
12	13	Omp.266.SER.H	Omp.266.SER.N	7.83194	118.888	0	0	None	3.22759e+06	1
13	14	Omp.221.TYR.H	Omp.221.TYR.N	8.81658	119.414	19.279	11.7224	96552080	2.60642e+06	1
14	15	Omp.301.ASP.H	Omp.301.ASP.N	7.46835	119.287	18.9762	12.3306	99106256	2.68036e+06	1
15	16	Omp.250.GLN.H	Omp.250.GLN.N	8.65492	122.585	19.9532	14.452	117992776	295402	1
16	17	Omp.196.LEU.H	Omp.196.LEU.N	9.35293	127.643	21.4896	14.2388	80740064	2.32471e+06	1
17	18	Omp.210.LYS.H	Omp.210.LYS.N	8.46108	123.697	18.6522	12.6865	94145528	2.573e+06	1
18	19	Omp.208.THR.H	Omp.208.THR.N	7.17531	109.984	20.324	12.3602	119157096	3.41385e+06	1
19	20	Omp.314.LYS.H	Omp.314.LYS.N	9.07312	128.114	21.2095	11.9232	91891896	2.6291e+06	1
20	21	Omp.203.ASN.H	Omp.203.ASN.N	8.4914	119.609	27.139	12.7753	108134736	3.08156e+06	1
21	22	Omp.294.LYS.H	Omp.294.LYS.N	8.34484	124.97	24.7638	23.7049	30305362	3.48252e+06	1
22	23	Omp.230.LYS.H	Omp.230.LYS.N	8.20459	118.299	20.898	11.7937	141703984	3.96478e+06	1
23	24	Omp.226.ASN.H	Omp.226.ASN.N	8.1796	119.831	18.0823	12.0502	145977312	17613.1	1
24	25	Omp.202.PHE.H	Omp.202.PHE.N	7.77043	111.382	22.3989	12.5071	75540952	2.24989e+06	1
25	26	Omp.214.GLN.H	Omp.214.GLN.N	7.79796	121.38	19.3983	13.2305	72435984	1.97914e+06	1
26	27	Omp.311.ILE.H	Omp.311.ILE.N	9.37405	122.768	22.0778	11.5615	78963360	2.33942e+06	1
27	28	Omp.316.ILE.H	Omp.316.ILE.N	7.94005	119.513	0	12.638	101093304	457568	1
28	29	Omp.288.ASN.H	Omp.288.ASN.N	9.05637	126.913	24.9445	13.7838	40664320	1.20793e+06	1
29	30	Omp.205.ASN.H	Omp.205.ASN.N	8.584	114.507	21.9694	12.2503	116111736	3443323	1
30	31	Omp.238.GLY.H	Omp.238.GLY.N	8.58293	108.233	23.1804	12.2112	74538664	2.15522e+06	1
31	32	Omp.245.SER.H	Omp.245.SER.N	8.3024	115.112	21.9335	12.3034	73279992	2.10858e+06	1
32	33	Omp.304.ALA.H	Omp.304.ALA.N	7.32012	122.99	19.1589	12.4822	89746744	2.58945e+06	1
33	34	Omp.239.TYR.H	Omp.239.TYR.N	8.54256	122.334	22.0741	14.1609	71307136	969189	1
34	35	Omp.213.GLY.H	Omp.213.GLY.N	7.60373	110.389	22.2348	12.0385	85154096	2.38333e+06	1
35	36	Omp.264.LEU.H	Omp.264.LEU.N	8.51373	120.586	20.7209	15.9444	72992312	2.15462e+06	1
36	37	Omp.248.TYR.H	Omp.248.TYR.N	7.81527	120.744	27.1434	13.2474	106189616	3.18413e+06	1
37	38	Omp.292.ASN.H	Omp.292.ASN.N	8.68504	121.568	28.1405	15.9478	18235486	3403.89	1
38	39	Omp.200.VAL.H	Omp.200.VAL.N	6.852	116.786	21.3709	11.879	73557456	2.11571e+06	1
39	40	Omp.298.ALA.H	Omp.298.ALA.N	7.04746	119.104	20.2163	12.0797	121615120	3.42981e+06	1
40	41	Omp.269.ILE.H	Omp.269.ILE.N	8.03983	125.14	19.662	12.2059	94966576	2.77207e+06	1
41	42	Omp.219.GLN.H	Omp.219.GLN.N	7.6958	119.789	19.0092	12.3827	103692032	2.93773e+06	1
42	43	Omp.209.LEU.H	Omp.209.LEU.N	8.8321	124.677	19.3036	12.8122	105934184	156038	1
43	44	Omp.285.VAL.H	Omp.285.VAL.N	8.548	124.636	23.0738	12.8546	55048508	1.6315e+06	1
44	45	Omp.290.CYS.H	Omp.290.CYS.N	8.5229	117.362	21.5167	12.7298	215186560	1.5618e+06	1
45	46	Omp.225.SER.H	Omp.225.SER.N	7.18895	112.303	18.7923	12.2544	140701328	3.82339e+06	1
46	47	Omp.293.VAL.H	Omp.293.VAL.N	7.37673	122.736	20.7344	11.5058	137325952	3.78463e+06	1
47	48	Omp.256.ARG.H	Omp.256.ARG.N	8.4914	119.609	27.139	12.7753	108134736	996686	1
48	49	Omp.280.GLY.H	Omp.280.GLY.N	8.67295	110.653	22.6773	12.5095	55966064	1.65885e+06	1
49	50	Omp.303.LEU.H	Omp.303.LEU.N	8.05734	114.82	20.2235	12.67	71115288	2.01524e+06	1
50	51	Omp.198.SER.H	Omp.198.SER.N	8.64338	123.197	21.1951	15.0928	106445336	501003	1
51	52	Omp.194.PHE.H	Omp.194.PHE.N	9.07258	122.351	21.3025	13.5348	71096832	2.15697e+06	1
52	53	Omp.204.PHE.H	Omp.204.PHE.N	7.46503	120.513	19.0202	12.2421	103842096	2.96542e+06	1
53	54	Omp.302.CYS.H	Omp.302.CYS.N	8.41055	122.592	24.7537	14.5269	99254392	-1789.48	1
54	55	Omp.322.GLN.H	Omp.322.GLN.N	8.38951	124.236	18.4616	11.6096	355620704	9.82188e+06	1
55	56	Omp.192.LYS.H	Omp.192.LYS.N	8.96989	124.023	21.1833	11.958	109830432	153417	1
56	57	Omp.240.THR.H	Omp.240.THR.N	8.71227	112.96	23.1171	12.3725	66300516	119374	1
57	58	Omp.190.GLN.H	Omp.190.GLN.N	8.76276	124.441	20.302	12.7035	128607376	1.3769e+06	1
58	59	Omp.195.THR.H	Omp.195.THR.N	8.89359	118.925	21.6773	11.6706	120560616	3.20345e+06	1
59	60	Omp.217.LEU.H	Omp.217.LEU.N	7.90524	119.507	21.2634	11.9686	231728304	3.79376e+06	1
60	61	Omp.278.GLY.H	Omp.278.GLY.N	9.30367	112.543	21.8055	11.675	87543160	2.4349e+06	1
61	62	Omp.241.ASP.H	Omp.241.ASP.N	7.07164	114.915	25.4303	15.7494	23411282	677668	1
62	63	Omp.295.GLN.H	Omp.295.GLN.N	7.74574	120.325	19.36	12.0893	180882832	4.90063e+06	1
63	64	Omp.286.THR.H	Omp.286.THR.N	10.1477	113.23	23.5697	12.1695	53435708	88256.6	1
64	65	Omp.237.LEU.H	Omp.237.LEU.N	9.71323	127.803	22.0804	12.3658	79920704	2.31079e+06	1
65	66	Omp.321.THR.H	Omp.321.THR.N	8.3075	119.318	0	0	None	95544.3	1
66	67	Omp.244.GLY.H	Omp.244.GLY.N	8.50966	114.247	21.8112	11.8381	77288424	211982	1
67	68	Omp.267.LYS.H	Omp.267.LYS.N	7.15715	119.465	19.9002	12.2526	99873720	2.83996e+06	1
68	69	Omp.228.ASP.H	Omp.228.ASP.N	8.87086	127.535	20.9287	12.2003	100494136	299311	1
69	70	Omp.271.ALA.H	Omp.271.ALA.N	8.66862	125.177	17.8375	14.5461	120246744	108156	1
70	71	Omp.259.SER.H	Omp.259.SER.N	8.35505	116.465	18.5045	11.8572	128406680	3.54833e+06	1
71	72	Omp.252.LEU.H	Omp.252.LEU.N	8.27329	122.899	22.839	15.7053	49033716	1.02484e+06	1
72	73	Omp.274.ILE.H	Omp.274.ILE.N	7.32566	116.724	20.7841	11.6087	123601128	3.56195e+06	1
73	74	Omp.325.ALA.H	Omp.325.ALA.N	8.01578	131.555	16.9552	11.3587	207830144	32110.5	1
74	75	Omp.218.ASP.H	Omp.218.ASP.N	8.97438	123.516	17.9595	13.1393	101570416	2.79498e+06	1
75	76	Omp.231.ASP.H	Omp.231.ASP.N	8.5229	117.362	21.5167	12.7298	215186560	568981	1
76	77	Omp.246.ASP.H	Omp.246.ASP.N	8.80494	125.39	20.1648	15.5129	52743604	74696.3	1
77	78	Omp.268.GLY.H	Omp.268.GLY.N	7.36131	102.934	21.0736	11.5314	77691360	2.15419e+06	1
78	79	Omp.297.ALA.H	Omp.297.ALA.N	8.62103	120.692	18.3858	11.946	195248032	188991	1
79	80	Omp.232.GLY.H	Omp.232.GLY.N	7.99313	109.142	20.4592	12.0437	114643928	3.13548e+06	1
80	81	Omp.320.VAL.H	Omp.320.VAL.N	8.30174	124.613	19.821	12.8165	278258080	854066	1
81	82	Omp.191.THR.H	Omp.191.THR.N	8.26004	116.848	25.8021	12.3506	119740784	3.33153e+06	1
82	83	Omp.236.VAL.H	Omp.236.VAL.N	8.7968	127.642	21.9617	12.0961	95785904	1.24652e+06	1
83	84	Omp.310.GLU.H	Omp.310.GLU.N	9.63141	125.654	24.7534	12.8244	59959200	1.71727e+06	1
84	85	Omp.299.LEU.H	Omp.299.LEU.N	8.67094	124.779	21.1293	16.8954	79314000	2.5368e+06	1
85	86	Omp.258.GLN.H	Omp.258.GLN.N	8.48479	117.172	19.2433	12.4844	92938680	1.0374e+06	1
86	87	Omp.272.ASP.H	Omp.272.ASP.N	8.47054	110.909	19.1524	12.0942	130830096	3.66142e+06	1
87	88	Omp.307.ARG.H	Omp.307.ARG.N	7.56505	117.219	20.8026	14.4017	61960160	1.78215e+06	1
88	89	Omp.233.SER.H	Omp.233.SER.N	8.6404	116.107	20.262	11.9775	107185376	2.97117e+06	1
89	90	Omp.324.GLN.H	Omp.324.GLN.N	8.5385	121.462	17.8147	13.9229	191926752	3.12608e+06	1
90	91	Omp.260.VAL.H	Omp.260.VAL.N	7.62575	121.281	21.0512	12.049	100959832	2.8933e+06	1
91	92	Omp.309.VAL.H	Omp.309.VAL.N	9.01036	118.938	21.9135	12.3218	83215376	2.3972e+06	1
92	93	Omp.287.GLY.H	Omp.287.GLY.N	7.29724	110.162	20.6397	12.1131	107247128	2.77591e+06	1
93	94	Omp.313.VAL.H	Omp.313.VAL.N	9.15132	126.569	23.6281	12.996	72440824	2.3486e+06	1
94	95	Omp.279.MET.H	Omp.279.MET.N	8.89248	123.583	22.7619	12.8112	58378296	1.76385e+06	1
95	96	Omp.319.VAL.H	Omp.319.VAL.N	8.17974	120.868	18.0358	13.0875	147198976	83697.6	1
96	97	Omp.222.SER.H	Omp.222.SER.N	7.78334	113.32	19.0257	12.637	128883128	3.62344e+06	1
97	98	Omp.281.GLU.H	Omp.281.GLU.N	8.65492	122.585	19.9532	14.452	117992776	754241	1
98	99	Omp.199.ASP.H	Omp.199.ASP.N	9.08451	118.44	19.9083	12.8039	93618112	2.66002e+06	1
99	100	Omp.189.VAL.H	Omp.189.VAL.N	8.24509	121.415	19.7973	15.488	19803944	97308.5	1
100	101	Omp.254.GLU.H	Omp.254.GLU.N	7.61137	125.139	20.8219	12.4488	84475216	2.41155e+06	1
101	102	Omp.216.ALA.H	Omp.216.ALA.N	7.52017	120.994	18.372	12.2614	128198600	3.4965e+06	1
102	103	Omp.197.LYS.H	Omp.197.LYS.N	8.85674	122.315	19.4457	12.6193	101979672	2.9565e+06	1
103	104	Omp.317.LYS.H	Omp.317.LYS.N	8.18925	127.067	20.1859	12.3454	140838272	4.03323e+06	1
104	105	Omp.212.GLU.H	Omp.212.GLU.N	10.0531	118.053	19.4795	11.9838	117954288	3.27993e+06	1
105	106	Omp.247.ALA.H	Omp.247.ALA.N	8.43587	122.989	20.3383	15.1256	80946088	64645.7	1
106	107	Omp.318.ASP.H	Omp.318.ASP.N	8.38197	122.635	18.6036	11.8142	258016288	2.0412e+06	1
107	108	Omp.283.ASN.H	Omp.283.ASN.N	8.9455	114.442	20.7301	12.5696	71241072	14246.6	1
108	109	Omp.253.SER.H	Omp.253.SER.N	8.43952	114.354	44.6445	13.1623	15596213	315110	1
109	110	Omp.275.SER.H	Omp.275.SER.N	7.92771	118.264	21.4463	12.2071	99603040	2.77963e+06	1
110	111	Omp.306.ASP.H	Omp.306.ASP.N	8.04179	112.457	20.3907	12.98	79436736	2.2964e+06	1
111	112	Omp.265.ILE.H	Omp.265.ILE.N	9.09322	122.666	20.3394	12.2872	94389528	2.71812e+06	1
112	113	Omp.223.GLN.H	Omp.223.GLN.N	7.65359	118.642	20.4836	12.595	104855896	2.93627e+06	1
113	114	Omp.201.LEU.H	Omp.201.LEU.N	6.90194	115.332	19.7452	12.7546	73842888	2.0907e+06	1
114	115	Omp.193.HIS.H	Omp.193.HIS.N	8.24213	120.713	22.7511	12.0926	101068824	18869	1
115	116	Omp.224.LEU.H	Omp.224.LEU.N	7.576	117.927	20.3935	12.4794	104637304	2.92745e+06	1
116	117	Omp.249.ASN.H	Omp.249.ASN.N	8.64732	119.594	19.1328	13.2033	155454064	4.55873e+06	1
117	118	Omp.261.VAL.H	Omp.261.VAL.N	8.09666	120.937	17.3898	13.0708	85307312	2.41915e+06	1
118	119	Omp.255.ARG.H	Omp.255.ARG.N	8.105	118.788	22	14.9798	74164296	2.16789e+06	1
119	120	Omp.289.THR.H	Omp.289.THR.N	8.58438	115.365	18.92	12.6944	134963536	3.80576e+06	1
120	121	Omp.300.ILE.H	Omp.300.ILE.N	8.28849	119.187	19.3347	11.6573	338038336	3.19531e+06	1
121	122	Omp.215.ALA.H	Omp.215.ALA.N	7.80167	119.023	18.6587	12.7231	107608096	3.03393e+06	1
122	123	Omp.291.ASP.H	Omp.291.ASP.N	8.61142	122.12	19.3781	13.3197	99387480	-52659	1
123	124	Omp.262.ASP.H	Omp.262.ASP.N	9.24932	119.112	18.4367	12.1359	105532960	2.90377e+06	1
124	125	Omp.273.LYS.H	Omp.273.LYS.N	7.8692	117.443	20.3446	13.2843	190904528	3.87286e+06	1
125	126	Omp.296.ARG.H	Omp.296.ARG.N	8.72971	126.627	22.1477	13.4645	72140680	14370.6	1
126	127	Omp.308.ARG.H	Omp.308.ARG.N	7.74517	124.343	21.8662	12.3308	64879464	1.96494e+06	1
127	128			8.03937	121.143	20.7424	13.3529	93665520	None	1

## Sheet: 100 eq
	#	Pid	Spectrum	PeakList	Id	Assign F1	Assign F2	Pos F1	Pos F2	LW F1 (Hz)	LW F2 (Hz)	Height	HeightError	Volume	VolumeError	Merit	Comment
0	1	PK:OmpA_31-1.2.1	OmpA_31-1	2	1	Omp.277.ARG.H	Omp.277.ARG.N	8.98703	119.723	21.0257	12.6123	97703472		2.85507e+06		1
1	2	PK:OmpA_31-1.2.2	OmpA_31-1	2	2	Omp.276.ALA.H	Omp.276.ALA.N	8.66305	123.053	22.6823	20.6142	60828724		1.49782e+06		1
2	3	PK:OmpA_31-1.2.3	OmpA_31-1	2	3	Omp.234.VAL.H	Omp.234.VAL.N	9.01169	122.054	22.3564	11.3825	104104544		3225005		1
3	4	PK:OmpA_31-1.2.4	OmpA_31-1	2	4	Omp.227.LEU.H	Omp.227.LEU.N	7.49507	121.374	18.9043	11.8894	164436672		1.32126e+06		1
4	5	PK:OmpA_31-1.2.5	OmpA_31-1	2	5	Omp.257.ALA.H	Omp.257.ALA.N	8.03858	121.15	21.3205	13.3207	77858288		-10003.3		1
5	6	PK:OmpA_31-1.2.6	OmpA_31-1	2	6	Omp.282.SER.H	Omp.282.SER.N	7.9339	115.508	21.5743	12.4388	102276472		1.56162e+06		1
6	7	PK:OmpA_31-1.2.7	OmpA_31-1	2	7	Omp.315.GLY.H	Omp.315.GLY.N	8.41418	108.251	21.7807	12.1293	94180632		2.83926e+06		1
7	8	PK:OmpA_31-1.2.8	OmpA_31-1	2	8	Omp.251.GLY.H	Omp.251.GLY.N	7.80648	108.103	31.9894	15.5709	14389266		378679		1
8	9	PK:OmpA_31-1.2.9	OmpA_31-1	2	9	Omp.263.TYR.H	Omp.263.TYR.N	7.98058	121.742	19.4578	11.6006	102358424		2.94405e+06		1
9	10	PK:OmpA_31-1.2.10	OmpA_31-1	2	10	Omp.312.GLU.H	Omp.312.GLU.N	9.34123	128.022	22.505	13.1071	80141200		2.48425e+06		1
10	11	PK:OmpA_31-1.2.11	OmpA_31-1	2	11	Omp.235.VAL.H	Omp.235.VAL.N	9.21178	129.763	21.588	11.4196	104774120		3.25863e+06		1
11	12	PK:OmpA_31-1.2.12	OmpA_31-1	2	12	Omp.220.LEU.H	Omp.220.LEU.N	7.73858	121.606	18.8481	11.9731	96798504		2.84113e+06		1
12	13	PK:OmpA_31-1.2.13	OmpA_31-1	2	13	Omp.266.SER.H	Omp.266.SER.N	7.83194	118.888	0	0	None		3.22759e+06		1
13	14	PK:OmpA_31-1.2.14	OmpA_31-1	2	14	Omp.221.TYR.H	Omp.221.TYR.N	8.81489	119.406	19.3096	12.58	88080800		2.60642e+06		1
14	15	PK:OmpA_31-1.2.15	OmpA_31-1	2	15	Omp.301.ASP.H	Omp.301.ASP.N	7.46696	119.287	18.691	12.5202	93866968		2.68036e+06		1
15	16	PK:OmpA_31-1.2.16	OmpA_31-1	2	16	Omp.250.GLN.H	Omp.250.GLN.N	8.65281	122.59	21.2222	19.7596	96300792		295402		1
16	17	PK:OmpA_31-1.2.17	OmpA_31-1	2	17	Omp.196.LEU.H	Omp.196.LEU.N	9.35124	127.645	22.3814	15.0776	73415376		2.32471e+06		1
17	18	PK:OmpA_31-1.2.18	OmpA_31-1	2	18	Omp.210.LYS.H	Omp.210.LYS.N	8.45958	123.692	20.8854	12.3066	84630280		2.573e+06		1
18	19	PK:OmpA_31-1.2.19	OmpA_31-1	2	19	Omp.208.THR.H	Omp.208.THR.N	7.175	109.986	20.3578	12.1596	118093000		3.41385e+06		1
19	20	PK:OmpA_31-1.2.20	OmpA_31-1	2	20	Omp.314.LYS.H	Omp.314.LYS.N	9.0702	128.113	21.8288	11.9192	90289440		2.6291e+06		1
20	21	PK:OmpA_31-1.2.21	OmpA_31-1	2	21	Omp.203.ASN.H	Omp.203.ASN.N	8.48927	119.613	24.5868	13.0994	106926976		3.08156e+06		1
21	22	PK:OmpA_31-1.2.22	OmpA_31-1	2	22	Omp.294.LYS.H	Omp.294.LYS.N	8.34453	124.957	21.2176	12.1974	121462232		3.48252e+06		1
22	23	PK:OmpA_31-1.2.23	OmpA_31-1	2	23	Omp.230.LYS.H	Omp.230.LYS.N	8.20268	118.295	21.1639	11.649	139749232		3.96478e+06		1
23	24	PK:OmpA_31-1.2.24	OmpA_31-1	2	24	Omp.226.ASN.H	Omp.226.ASN.N	8.17951	119.827	17.7356	12.5745	145941488		17613.1		1
24	25	PK:OmpA_31-1.2.25	OmpA_31-1	2	25	Omp.202.PHE.H	Omp.202.PHE.N	7.76968	111.37	21.8992	12.0952	75291272		2.24989e+06		1
25	26	PK:OmpA_31-1.2.26	OmpA_31-1	2	26	Omp.214.GLN.H	Omp.214.GLN.N	7.79652	121.363	20.2435	14.3631	68145872		1.97914e+06		1
26	27	PK:OmpA_31-1.2.27	OmpA_31-1	2	27	Omp.311.ILE.H	Omp.311.ILE.N	9.37248	122.764	21.6965	11.7366	74344968		2.33942e+06		1
27	28	PK:OmpA_31-1.2.28	OmpA_31-1	2	28	Omp.316.ILE.H	Omp.316.ILE.N	7.94005	119.516	0	12.5585	96937536		457568		1
28	29	PK:OmpA_31-1.2.29	OmpA_31-1	2	29	Omp.288.ASN.H	Omp.288.ASN.N	9.05319	126.924	25.4893	15.6624	31510918		1.20793e+06		1
29	30	PK:OmpA_31-1.2.30	OmpA_31-1	2	30	Omp.205.ASN.H	Omp.205.ASN.N	8.58246	114.51	21.9165	12.8591	107192640		3443323		1
30	31	PK:OmpA_31-1.2.31	OmpA_31-1	2	31	Omp.238.GLY.H	Omp.238.GLY.N	8.58242	108.233	24.5693	11.9986	70336944		2.15522e+06		1
31	32	PK:OmpA_31-1.2.32	OmpA_31-1	2	32	Omp.245.SER.H	Omp.245.SER.N	8.29548	115.076	22.9699	12.2686	72446768		2.10858e+06		1
32	33	PK:OmpA_31-1.2.33	OmpA_31-1	2	33	Omp.304.ALA.H	Omp.304.ALA.N	7.31908	122.989	18.9783	12.4488	85016968		2.58945e+06		1
33	34	PK:OmpA_31-1.2.34	OmpA_31-1	2	34	Omp.239.TYR.H	Omp.239.TYR.N	8.53986	122.338	21.4036	14.1739	68565024		969189		1
34	35	PK:OmpA_31-1.2.35	OmpA_31-1	2	35	Omp.213.GLY.H	Omp.213.GLY.N	7.60317	110.389	21.0941	12.2781	78859728		2.38333e+06		1
35	36	PK:OmpA_31-1.2.36	OmpA_31-1	2	36	Omp.264.LEU.H	Omp.264.LEU.N	8.51252	120.587	20.933	16.2351	67462624		2.15462e+06		1
36	37	PK:OmpA_31-1.2.37	OmpA_31-1	2	37	Omp.248.TYR.H	Omp.248.TYR.N	7.81517	120.747	23.4735	12.6296	103617240		3.18413e+06		1
37	38	PK:OmpA_31-1.2.38	OmpA_31-1	2	38	Omp.292.ASN.H	Omp.292.ASN.N	8.68817	121.551	25.4043	15.0429	25580944		3403.89		1
38	39	PK:OmpA_31-1.2.39	OmpA_31-1	2	39	Omp.200.VAL.H	Omp.200.VAL.N	6.85193	116.791	21.2684	11.995	71497952		2.11571e+06		1
39	40	PK:OmpA_31-1.2.40	OmpA_31-1	2	40	Omp.298.ALA.H	Omp.298.ALA.N	7.04677	119.1	19.6747	12.1634	112699384		3.42981e+06		1
40	41	PK:OmpA_31-1.2.41	OmpA_31-1	2	41	Omp.269.ILE.H	Omp.269.ILE.N	8.03863	125.138	19.5033	12.1249	95115432		2.77207e+06		1
41	42	PK:OmpA_31-1.2.42	OmpA_31-1	2	42	Omp.219.GLN.H	Omp.219.GLN.N	7.69375	119.793	19.5073	12.3408	95654824		2.93773e+06		1
42	43	PK:OmpA_31-1.2.43	OmpA_31-1	2	43	Omp.209.LEU.H	Omp.209.LEU.N	8.83003	124.678	19.7641	13.5656	94521160		156038		1
43	44	PK:OmpA_31-1.2.44	OmpA_31-1	2	44	Omp.285.VAL.H	Omp.285.VAL.N	8.54526	124.634	22.3246	12.4356	55313652		1.6315e+06		1
44	45	PK:OmpA_31-1.2.45	OmpA_31-1	2	45	Omp.290.CYS.H	Omp.290.CYS.N	8.52132	117.36	20.7776	12.4625	212399344		1.5618e+06		1
45	46	PK:OmpA_31-1.2.46	OmpA_31-1	2	46	Omp.225.SER.H	Omp.225.SER.N	7.18795	112.306	18.7099	12.6309	134642768		3.82339e+06		1
46	47	PK:OmpA_31-1.2.47	OmpA_31-1	2	47	Omp.293.VAL.H	Omp.293.VAL.N	7.37576	122.738	20.3381	11.6995	131334288		3.78463e+06		1
47	48	PK:OmpA_31-1.2.48	OmpA_31-1	2	48	Omp.256.ARG.H	Omp.256.ARG.N	8.48927	119.613	24.5868	13.0994	106926976		996686		1
48	49	PK:OmpA_31-1.2.49	OmpA_31-1	2	49	Omp.280.GLY.H	Omp.280.GLY.N	8.67019	110.658	23.9276	12.4616	51505368		1.65885e+06		1
49	50	PK:OmpA_31-1.2.50	OmpA_31-1	2	50	Omp.303.LEU.H	Omp.303.LEU.N	8.0569	114.824	20.2121	13.2632	66673028		2.01524e+06		1
50	51	PK:OmpA_31-1.2.51	OmpA_31-1	2	51	Omp.198.SER.H	Omp.198.SER.N	8.64141	123.194	20.2094	13.3899	101363904		501003		1
51	52	PK:OmpA_31-1.2.52	OmpA_31-1	2	52	Omp.194.PHE.H	Omp.194.PHE.N	9.07072	122.344	22.3694	12.4891	69531912		2.15697e+06		1
52	53	PK:OmpA_31-1.2.53	OmpA_31-1	2	53	Omp.204.PHE.H	Omp.204.PHE.N	7.46428	120.51	18.7805	12.263	104206032		2.96542e+06		1
53	54	PK:OmpA_31-1.2.54	OmpA_31-1	2	54	Omp.302.CYS.H	Omp.302.CYS.N	8.40898	122.595	24.8492	14.0466	102820880		-1789.48		1
54	55	PK:OmpA_31-1.2.55	OmpA_31-1	2	55	Omp.322.GLN.H	Omp.322.GLN.N	8.38853	124.238	18.6271	11.4459	347629760		9.82188e+06		1
55	56	PK:OmpA_31-1.2.56	OmpA_31-1	2	56	Omp.192.LYS.H	Omp.192.LYS.N	8.96771	124.03	22.2941	12.6761	100371992		153417		1
56	57	PK:OmpA_31-1.2.57	OmpA_31-1	2	57	Omp.240.THR.H	Omp.240.THR.N	8.70862	112.972	22.2385	13.6144	62382736		119374		1
57	58	PK:OmpA_31-1.2.58	OmpA_31-1	2	58	Omp.190.GLN.H	Omp.190.GLN.N	8.76176	124.447	19.8697	12.6756	119476784		1.3769e+06		1
58	59	PK:OmpA_31-1.2.59	OmpA_31-1	2	59	Omp.195.THR.H	Omp.195.THR.N	8.89007	118.908	21.6516	11.7014	118012752		3.20345e+06		1
59	60	PK:OmpA_31-1.2.60	OmpA_31-1	2	60	Omp.217.LEU.H	Omp.217.LEU.N	7.90481	119.507	20.417	12.1402	225288752		3.79376e+06		1
60	61	PK:OmpA_31-1.2.61	OmpA_31-1	2	61	Omp.278.GLY.H	Omp.278.GLY.N	9.30209	112.543	21.6379	12.3221	82839624		2.4349e+06		1
61	62	PK:OmpA_31-1.2.62	OmpA_31-1	2	62	Omp.241.ASP.H	Omp.241.ASP.N	7.07137	114.923	23.4231	15.9353	20476726		677668		1
62	63	PK:OmpA_31-1.2.63	OmpA_31-1	2	63	Omp.295.GLN.H	Omp.295.GLN.N	7.74485	120.323	18.7704	11.7888	178764944		4.90063e+06		1
63	64	PK:OmpA_31-1.2.64	OmpA_31-1	2	64	Omp.286.THR.H	Omp.286.THR.N	10.1457	113.228	24.9009	12.5921	53952748		88256.6		1
64	65	PK:OmpA_31-1.2.65	OmpA_31-1	2	65	Omp.237.LEU.H	Omp.237.LEU.N	9.71051	127.812	21.3131	12.426	81081328		2.31079e+06		1
65	66	PK:OmpA_31-1.2.66	OmpA_31-1	2	66	Omp.321.THR.H	Omp.321.THR.N	8.3075	119.318	0	0	None		95544.3		1
66	67	PK:OmpA_31-1.2.67	OmpA_31-1	2	67	Omp.244.GLY.H	Omp.244.GLY.N	8.50899	114.217	21.4255	12.5123	69328376		211982		1
67	68	PK:OmpA_31-1.2.68	OmpA_31-1	2	68	Omp.267.LYS.H	Omp.267.LYS.N	7.1567	119.46	19.8283	12.2022	93942688		2.83996e+06		1
68	69	PK:OmpA_31-1.2.69	OmpA_31-1	2	69	Omp.228.ASP.H	Omp.228.ASP.N	8.86935	127.544	20.259	12.2427	95237952		299311		1
69	70	PK:OmpA_31-1.2.70	OmpA_31-1	2	70	Omp.271.ALA.H	Omp.271.ALA.N	8.66676	125.172	18.7788	14.6197	107106544		108156		1
70	71	PK:OmpA_31-1.2.71	OmpA_31-1	2	71	Omp.259.SER.H	Omp.259.SER.N	8.3531	116.466	18.9953	11.8911	116957024		3.54833e+06		1
71	72	PK:OmpA_31-1.2.72	OmpA_31-1	2	72	Omp.252.LEU.H	Omp.252.LEU.N	8.27026	122.9	21.4712	15.9628	46387284		1.02484e+06		1
72	73	PK:OmpA_31-1.2.73	OmpA_31-1	2	73	Omp.274.ILE.H	Omp.274.ILE.N	7.32488	116.722	21.2603	11.2626	119933368		3.56195e+06		1
73	74	PK:OmpA_31-1.2.74	OmpA_31-1	2	74	Omp.325.ALA.H	Omp.325.ALA.N	8.01487	131.555	16.634	11.5747	201585984		32110.5		1
74	75	PK:OmpA_31-1.2.75	OmpA_31-1	2	75	Omp.218.ASP.H	Omp.218.ASP.N	8.97187	123.508	18.683	13.6548	89484928		2.79498e+06		1
75	76	PK:OmpA_31-1.2.76	OmpA_31-1	2	76	Omp.231.ASP.H	Omp.231.ASP.N	8.52132	117.36	20.7776	12.4625	212399344		568981		1
76	77	PK:OmpA_31-1.2.77	OmpA_31-1	2	77	Omp.246.ASP.H	Omp.246.ASP.N	8.80144	125.374	20.8708	14.0788	53293580		74696.3		1
77	78	PK:OmpA_31-1.2.78	OmpA_31-1	2	78	Omp.268.GLY.H	Omp.268.GLY.N	7.36079	102.93	21.2618	11.8405	75705720		2.15419e+06		1
78	79	PK:OmpA_31-1.2.79	OmpA_31-1	2	79	Omp.297.ALA.H	Omp.297.ALA.N	8.63005	120.676	19.2932	12.5373	164000704		188991		1
79	80	PK:OmpA_31-1.2.80	OmpA_31-1	2	80	Omp.232.GLY.H	Omp.232.GLY.N	7.99144	109.133	19.5622	11.793	109907960		3.13548e+06		1
80	81	PK:OmpA_31-1.2.81	OmpA_31-1	2	81	Omp.320.VAL.H	Omp.320.VAL.N	8.3005	124.614	20.9295	12.6641	272611008		854066		1
81	82	PK:OmpA_31-1.2.82	OmpA_31-1	2	82	Omp.191.THR.H	Omp.191.THR.N	8.25855	116.859	22.8811	12.1911	114006808		3.33153e+06		1
82	83	PK:OmpA_31-1.2.83	OmpA_31-1	2	83	Omp.236.VAL.H	Omp.236.VAL.N	8.79565	127.642	22.0881	11.8893	92648216		1.24652e+06		1
83	84	PK:OmpA_31-1.2.84	OmpA_31-1	2	84	Omp.310.GLU.H	Omp.310.GLU.N	9.62842	125.644	23.572	12.1387	60131196		1.71727e+06		1
84	85	PK:OmpA_31-1.2.85	OmpA_31-1	2	85	Omp.299.LEU.H	Omp.299.LEU.N	8.66974	124.793	20.3551	16.1141	76644792		2.5368e+06		1
85	86	PK:OmpA_31-1.2.86	OmpA_31-1	2	86	Omp.258.GLN.H	Omp.258.GLN.N	8.48442	117.174	19.5524	11.7442	94177216		1.0374e+06		1
86	87	PK:OmpA_31-1.2.87	OmpA_31-1	2	87	Omp.272.ASP.H	Omp.272.ASP.N	8.46861	110.911	18.8654	11.89	132054536		3.66142e+06		1
87	88	PK:OmpA_31-1.2.88	OmpA_31-1	2	88	Omp.307.ARG.H	Omp.307.ARG.N	7.56296	117.219	18.6523	13.1114	62081176		1.78215e+06		1
88	89	PK:OmpA_31-1.2.89	OmpA_31-1	2	89	Omp.233.SER.H	Omp.233.SER.N	8.63852	116.104	20.9921	12.2823	100293336		2.97117e+06		1
89	90	PK:OmpA_31-1.2.90	OmpA_31-1	2	90	Omp.324.GLN.H	Omp.324.GLN.N	8.53742	121.451	19.16	15.4858	175237696		3.12608e+06		1
90	91	PK:OmpA_31-1.2.91	OmpA_31-1	2	91	Omp.260.VAL.H	Omp.260.VAL.N	7.62444	121.289	20.6912	12.0174	93830120		2.8933e+06		1
91	92	PK:OmpA_31-1.2.92	OmpA_31-1	2	92	Omp.309.VAL.H	Omp.309.VAL.N	9.00805	118.937	24.6229	12.7556	75220176		2.3972e+06		1
92	93	PK:OmpA_31-1.2.93	OmpA_31-1	2	93	Omp.287.GLY.H	Omp.287.GLY.N	7.29658	110.159	20.7963	12.076	98229784		2.77591e+06		1
93	94	PK:OmpA_31-1.2.94	OmpA_31-1	2	94	Omp.313.VAL.H	Omp.313.VAL.N	9.15118	126.586	22.6031	12.038	75709352		2.3486e+06		1
94	95	PK:OmpA_31-1.2.95	OmpA_31-1	2	95	Omp.279.MET.H	Omp.279.MET.N	8.89113	123.582	22.3906	12.386	59773496		1.76385e+06		1
95	96	PK:OmpA_31-1.2.96	OmpA_31-1	2	96	Omp.319.VAL.H	Omp.319.VAL.N	8.17769	120.868	19.0604	13.4974	135259856		83697.6		1
96	97	PK:OmpA_31-1.2.97	OmpA_31-1	2	97	Omp.222.SER.H	Omp.222.SER.N	7.78214	113.32	18.6532	12.72	118958952		3.62344e+06		1
97	98	PK:OmpA_31-1.2.98	OmpA_31-1	2	98	Omp.281.GLU.H	Omp.281.GLU.N	8.65281	122.59	21.2222	19.7596	96300792		754241		1
98	99	PK:OmpA_31-1.2.99	OmpA_31-1	2	99	Omp.199.ASP.H	Omp.199.ASP.N	9.08247	118.435	19.995	12.9658	88018624		2.66002e+06		1
99	100	PK:OmpA_31-1.2.100	OmpA_31-1	2	100	Omp.189.VAL.H	Omp.189.VAL.N	8.2468	121.421	20.8968	14.512	17598094		97308.5		1
100	101	PK:OmpA_31-1.2.101	OmpA_31-1	2	101	Omp.254.GLU.H	Omp.254.GLU.N	7.6117	125.133	20.4442	12.8604	78942376		2.41155e+06		1
101	102	PK:OmpA_31-1.2.102	OmpA_31-1	2	102	Omp.216.ALA.H	Omp.216.ALA.N	7.51906	120.998	18.5625	12.1839	115772328		3.4965e+06		1
102	103	PK:OmpA_31-1.2.103	OmpA_31-1	2	103	Omp.197.LYS.H	Omp.197.LYS.N	8.8548	122.308	20.3738	12.2248	99396904		2.9565e+06		1
103	104	PK:OmpA_31-1.2.104	OmpA_31-1	2	104	Omp.317.LYS.H	Omp.317.LYS.N	8.18732	127.069	20.2043	12.0299	140541520		4.03323e+06		1
104	105	PK:OmpA_31-1.2.105	OmpA_31-1	2	105	Omp.212.GLU.H	Omp.212.GLU.N	10.0507	118.05	19.3074	12.3117	111493584		3.27993e+06		1
105	106	PK:OmpA_31-1.2.106	OmpA_31-1	2	106	Omp.247.ALA.H	Omp.247.ALA.N	8.43246	123.007	19.2043	13.5766	81200512		64645.7		1
106	107	PK:OmpA_31-1.2.107	OmpA_31-1	2	107	Omp.318.ASP.H	Omp.318.ASP.N	8.38078	122.635	18.2742	11.7925	255284768		2.0412e+06		1
107	108	PK:OmpA_31-1.2.108	OmpA_31-1	2	108	Omp.283.ASN.H	Omp.283.ASN.N	8.94372	114.448	21.0297	13.3639	69202944		14246.6		1
108	109	PK:OmpA_31-1.2.109	OmpA_31-1	2	109	Omp.253.SER.H	Omp.253.SER.N	8.44337	114.334	35.0077	12.6641	16754571		315110		1
109	110	PK:OmpA_31-1.2.110	OmpA_31-1	2	110	Omp.275.SER.H	Omp.275.SER.N	7.92621	118.254	21.5764	12.134	97025104		2.77963e+06		1
110	111	PK:OmpA_31-1.2.111	OmpA_31-1	2	111	Omp.306.ASP.H	Omp.306.ASP.N	8.0407	112.462	19.5912	12.698	78129464		2.2964e+06		1
111	112	PK:OmpA_31-1.2.112	OmpA_31-1	2	112	Omp.265.ILE.H	Omp.265.ILE.N	9.09129	122.663	19.9301	11.5315	94724176		2.71812e+06		1
112	113	PK:OmpA_31-1.2.113	OmpA_31-1	2	113	Omp.223.GLN.H	Omp.223.GLN.N	7.65301	118.647	20.841	12.217	99273176		2.93627e+06		1
113	114	PK:OmpA_31-1.2.114	OmpA_31-1	2	114	Omp.201.LEU.H	Omp.201.LEU.N	6.90188	115.327	20.2118	12.5468	69315136		2.0907e+06		1
114	115	PK:OmpA_31-1.2.115	OmpA_31-1	2	115	Omp.193.HIS.H	Omp.193.HIS.N	8.23486	120.758	22.3885	12.0097	98756768		18869		1
115	116	PK:OmpA_31-1.2.116	OmpA_31-1	2	116	Omp.224.LEU.H	Omp.224.LEU.N	7.57454	117.926	19.6667	12.695	99282480		2.92745e+06		1
116	117	PK:OmpA_31-1.2.117	OmpA_31-1	2	117	Omp.249.ASN.H	Omp.249.ASN.N	8.646	119.597	18.8448	13.8593	145694640		4.55873e+06		1
117	118	PK:OmpA_31-1.2.118	OmpA_31-1	2	118	Omp.261.VAL.H	Omp.261.VAL.N	8.09598	120.942	18.439	13.3393	81434368		2.41915e+06		1
118	119	PK:OmpA_31-1.2.119	OmpA_31-1	2	119	Omp.255.ARG.H	Omp.255.ARG.N	8.10296	118.789	21.2704	13.9587	74098544		2.16789e+06		1
119	120	PK:OmpA_31-1.2.120	OmpA_31-1	2	120	Omp.289.THR.H	Omp.289.THR.N	8.58264	115.365	19.5973	12.2918	130787256		3.80576e+06		1
120	121	PK:OmpA_31-1.2.121	OmpA_31-1	2	121	Omp.300.ILE.H	Omp.300.ILE.N	8.28732	119.191	18.7404	11.7194	335789312		3.19531e+06		1
121	122	PK:OmpA_31-1.2.122	OmpA_31-1	2	122	Omp.215.ALA.H	Omp.215.ALA.N	7.80037	119.026	19.6256	12.8843	98857128		3.03393e+06		1
122	123	PK:OmpA_31-1.2.123	OmpA_31-1	2	123	Omp.291.ASP.H	Omp.291.ASP.N	8.61037	122.12	19.1774	12.5824	101268888		-52659		1
123	124	PK:OmpA_31-1.2.124	OmpA_31-1	2	124	Omp.262.ASP.H	Omp.262.ASP.N	9.2466	119.115	18.576	12.1937	98836040		2.90377e+06		1
124	125	PK:OmpA_31-1.2.125	OmpA_31-1	2	125	Omp.273.LYS.H	Omp.273.LYS.N	7.86717	117.45	20.3721	13.7359	171836544		3.87286e+06		1
125	126	PK:OmpA_31-1.2.126	OmpA_31-1	2	126	Omp.296.ARG.H	Omp.296.ARG.N	8.72861	126.634	21.1153	12.9754	67476832		14370.6		1
126	127	PK:OmpA_31-1.2.127	OmpA_31-1	2	127	Omp.308.ARG.H	Omp.308.ARG.N	7.74326	124.344	20.9402	12.7635	65603360		1.96494e+06		1
127	128	PK:OmpA_31-1.2.128	OmpA_31-1	2	128			8.03858	121.15	21.3205	13.3207	77858288		None		1

## Sheet: 250 eq
	#	Pid	Spectrum	PeakList	Id	Assign F1	Assign F2	Pos F1	Pos F2	LW F1 (Hz)	LW F2 (Hz)	Height	HeightError	Volume	VolumeError	Merit	Comment
0	1	PK:OmpA_41-1.2.1	OmpA_41-1	2	1	Omp.277.ARG.H	Omp.277.ARG.N	8.9864	119.712	20.8331	12.5705	97227008		2.85507e+06		1
1	2	PK:OmpA_41-1.2.2	OmpA_41-1	2	2	Omp.276.ALA.H	Omp.276.ALA.N	8.66545	123.037	34.3024	25.3493	60627832		1.49782e+06		1
2	3	PK:OmpA_41-1.2.3	OmpA_41-1	2	3	Omp.234.VAL.H	Omp.234.VAL.N	9.01161	122.047	22.565	11.7978	105830424		3225005		1
3	4	PK:OmpA_41-1.2.4	OmpA_41-1	2	4	Omp.227.LEU.H	Omp.227.LEU.N	7.4953	121.373	18.6971	11.8884	163423360		1.32126e+06		1
4	5	PK:OmpA_41-1.2.5	OmpA_41-1	2	5	Omp.257.ALA.H	Omp.257.ALA.N	8.03858	121.146	21.3258	13.149	67378080		-10003.3		1
5	6	PK:OmpA_41-1.2.6	OmpA_41-1	2	6	Omp.282.SER.H	Omp.282.SER.N	7.93326	115.51	21.3369	12.3839	107543584		1.56162e+06		1
6	7	PK:OmpA_41-1.2.7	OmpA_41-1	2	7	Omp.315.GLY.H	Omp.315.GLY.N	8.41369	108.248	21.3631	11.8107	101293256		2.83926e+06		1
7	8	PK:OmpA_41-1.2.8	OmpA_41-1	2	8	Omp.251.GLY.H	Omp.251.GLY.N	7.81465	108.127	32.0046	17.1755	15029243		378679		1
8	9	PK:OmpA_41-1.2.9	OmpA_41-1	2	9	Omp.263.TYR.H	Omp.263.TYR.N	7.98133	121.736	19.5484	11.9362	102356160		2.94405e+06		1
9	10	PK:OmpA_41-1.2.10	OmpA_41-1	2	10	Omp.312.GLU.H	Omp.312.GLU.N	9.34187	128.032	22.58	12.9968	79511672		2.48425e+06		1
10	11	PK:OmpA_41-1.2.11	OmpA_41-1	2	11	Omp.235.VAL.H	Omp.235.VAL.N	9.2121	129.768	23.077	11.7195	101763472		3.25863e+06		1
11	12	PK:OmpA_41-1.2.12	OmpA_41-1	2	12	Omp.220.LEU.H	Omp.220.LEU.N	7.74006	121.599	19.7427	11.5866	96795200		2.84113e+06		1
12	13	PK:OmpA_41-1.2.13	OmpA_41-1	2	13	Omp.266.SER.H	Omp.266.SER.N	7.83194	118.888	0	0	None		3.22759e+06		1
13	14	PK:OmpA_41-1.2.14	OmpA_41-1	2	14	Omp.221.TYR.H	Omp.221.TYR.N	8.81542	119.404	18.9918	11.9598	91688832		2.60642e+06		1
14	15	PK:OmpA_41-1.2.15	OmpA_41-1	2	15	Omp.301.ASP.H	Omp.301.ASP.N	7.46751	119.283	18.8086	12.5109	94453368		2.68036e+06		1
15	16	PK:OmpA_41-1.2.16	OmpA_41-1	2	16	Omp.250.GLN.H	Omp.250.GLN.N	8.65133	122.577	21.4693	19.9335	81983056		295402		1
16	17	PK:OmpA_41-1.2.17	OmpA_41-1	2	17	Omp.196.LEU.H	Omp.196.LEU.N	9.35113	127.646	21.7731	13.3832	77390040		2.32471e+06		1
17	18	PK:OmpA_41-1.2.18	OmpA_41-1	2	18	Omp.210.LYS.H	Omp.210.LYS.N	8.46092	123.703	19.1896	12.5976	86900632		2.573e+06		1
18	19	PK:OmpA_41-1.2.19	OmpA_41-1	2	19	Omp.208.THR.H	Omp.208.THR.N	7.17637	110	21.2954	12.2313	112597624		3.41385e+06		1
19	20	PK:OmpA_41-1.2.20	OmpA_41-1	2	20	Omp.314.LYS.H	Omp.314.LYS.N	9.06985	128.108	21.8434	12.0439	88980352		2.6291e+06		1
20	21	PK:OmpA_41-1.2.21	OmpA_41-1	2	21	Omp.203.ASN.H	Omp.203.ASN.N	8.48961	119.611	24.7999	12.8776	107907576		3.08156e+06		1
21	22	PK:OmpA_41-1.2.22	OmpA_41-1	2	22	Omp.294.LYS.H	Omp.294.LYS.N	8.34289	124.897	24.9068	20.0656	26443310		3.48252e+06		1
22	23	PK:OmpA_41-1.2.23	OmpA_41-1	2	23	Omp.230.LYS.H	Omp.230.LYS.N	8.20368	118.301	21.2624	11.8769	135255680		3.96478e+06		1
23	24	PK:OmpA_41-1.2.24	OmpA_41-1	2	24	Omp.226.ASN.H	Omp.226.ASN.N	8.17918	119.824	19.2789	12.0149	148840576		17613.1		1
24	25	PK:OmpA_41-1.2.25	OmpA_41-1	2	25	Omp.202.PHE.H	Omp.202.PHE.N	7.77278	111.379	22.0724	12.2287	77199800		2.24989e+06		1
25	26	PK:OmpA_41-1.2.26	OmpA_41-1	2	26	Omp.214.GLN.H	Omp.214.GLN.N	7.79726	121.377	19.099	13.7815	70984840		1.97914e+06		1
26	27	PK:OmpA_41-1.2.27	OmpA_41-1	2	27	Omp.311.ILE.H	Omp.311.ILE.N	9.37293	122.758	22.3827	11.4986	74684200		2.33942e+06		1
27	28	PK:OmpA_41-1.2.28	OmpA_41-1	2	28	Omp.316.ILE.H	Omp.316.ILE.N	7.94005	119.518	0	12.5237	100241776		457568		1
28	29	PK:OmpA_41-1.2.29	OmpA_41-1	2	29	Omp.288.ASN.H	Omp.288.ASN.N	9.05222	126.902	29.3597	15.2787	26172504		1.20793e+06		1
29	30	PK:OmpA_41-1.2.30	OmpA_41-1	2	30	Omp.205.ASN.H	Omp.205.ASN.N	8.58352	114.508	21.9126	12.8074	99898072		3443323		1
30	31	PK:OmpA_41-1.2.31	OmpA_41-1	2	31	Omp.238.GLY.H	Omp.238.GLY.N	8.58247	108.237	23.4911	11.9778	69945032		2.15522e+06		1
31	32	PK:OmpA_41-1.2.32	OmpA_41-1	2	32	Omp.245.SER.H	Omp.245.SER.N	8.28861	115.025	23.1265	11.9043	67575600		2.10858e+06		1
32	33	PK:OmpA_41-1.2.33	OmpA_41-1	2	33	Omp.304.ALA.H	Omp.304.ALA.N	7.31984	122.986	19.5228	12.2391	83858632		2.58945e+06		1
33	34	PK:OmpA_41-1.2.34	OmpA_41-1	2	34	Omp.239.TYR.H	Omp.239.TYR.N	8.54125	122.337	23.051	14.6186	68331464		969189		1
34	35	PK:OmpA_41-1.2.35	OmpA_41-1	2	35	Omp.213.GLY.H	Omp.213.GLY.N	7.60348	110.384	21.59	12.9528	77686280		2.38333e+06		1
35	36	PK:OmpA_41-1.2.36	OmpA_41-1	2	36	Omp.264.LEU.H	Omp.264.LEU.N	8.51426	120.584	18.7662	15.1119	69264768		2.15462e+06		1
36	37	PK:OmpA_41-1.2.37	OmpA_41-1	2	37	Omp.248.TYR.H	Omp.248.TYR.N	7.81573	120.747	22.7351	12.424	102783560		3.18413e+06		1
37	38	PK:OmpA_41-1.2.38	OmpA_41-1	2	38	Omp.292.ASN.H	Omp.292.ASN.N	8.68652	121.542	22.5275	15.0138	24635820		3403.89		1
38	39	PK:OmpA_41-1.2.39	OmpA_41-1	2	39	Omp.200.VAL.H	Omp.200.VAL.N	6.85387	116.789	21.3936	11.7439	66804600		2.11571e+06		1
39	40	PK:OmpA_41-1.2.40	OmpA_41-1	2	40	Omp.298.ALA.H	Omp.298.ALA.N	7.04709	119.101	21.3175	12.1514	113765504		3.42981e+06		1
40	41	PK:OmpA_41-1.2.41	OmpA_41-1	2	41	Omp.269.ILE.H	Omp.269.ILE.N	8.03943	125.143	19.4565	12.1618	88929768		2.77207e+06		1
41	42	PK:OmpA_41-1.2.42	OmpA_41-1	2	42	Omp.219.GLN.H	Omp.219.GLN.N	7.69518	119.793	19.7392	12.3269	99570064		2.93773e+06		1
42	43	PK:OmpA_41-1.2.43	OmpA_41-1	2	43	Omp.209.LEU.H	Omp.209.LEU.N	8.83034	124.682	20.3026	12.6755	98284272		156038		1
43	44	PK:OmpA_41-1.2.44	OmpA_41-1	2	44	Omp.285.VAL.H	Omp.285.VAL.N	8.5488	124.628	23.2576	12.7128	52852284		1.6315e+06		1
44	45	PK:OmpA_41-1.2.45	OmpA_41-1	2	45	Omp.290.CYS.H	Omp.290.CYS.N	8.52193	117.36	20.9155	12.3496	214107696		1.5618e+06		1
45	46	PK:OmpA_41-1.2.46	OmpA_41-1	2	46	Omp.225.SER.H	Omp.225.SER.N	7.18923	112.305	19.2547	12.443	137515680		3.82339e+06		1
46	47	PK:OmpA_41-1.2.47	OmpA_41-1	2	47	Omp.293.VAL.H	Omp.293.VAL.N	7.37686	122.736	20.7879	11.5749	131512592		3.78463e+06		1
47	48	PK:OmpA_41-1.2.48	OmpA_41-1	2	48	Omp.256.ARG.H	Omp.256.ARG.N	8.48961	119.611	24.7999	12.8776	107907576		996686		1
48	49	PK:OmpA_41-1.2.49	OmpA_41-1	2	49	Omp.280.GLY.H	Omp.280.GLY.N	8.66717	110.662	22.9299	12.3822	50943804		1.65885e+06		1
49	50	PK:OmpA_41-1.2.50	OmpA_41-1	2	50	Omp.303.LEU.H	Omp.303.LEU.N	8.0576	114.82	19.9811	12.9172	65197344		2.01524e+06		1
50	51	PK:OmpA_41-1.2.51	OmpA_41-1	2	51	Omp.198.SER.H	Omp.198.SER.N	8.64107	123.186	21.1586	14.394	96345096		501003		1
51	52	PK:OmpA_41-1.2.52	OmpA_41-1	2	52	Omp.194.PHE.H	Omp.194.PHE.N	9.06939	122.339	21.8491	11.7929	70799384		2.15697e+06		1
52	53	PK:OmpA_41-1.2.53	OmpA_41-1	2	53	Omp.204.PHE.H	Omp.204.PHE.N	7.46421	120.509	18.7285	12.3333	100884256		2.96542e+06		1
53	54	PK:OmpA_41-1.2.54	OmpA_41-1	2	54	Omp.302.CYS.H	Omp.302.CYS.N	8.40896	122.593	25.3042	14.6918	99441576		-1789.48		1
54	55	PK:OmpA_41-1.2.55	OmpA_41-1	2	55	Omp.322.GLN.H	Omp.322.GLN.N	8.38871	124.236	19.0715	11.5227	347011232		9.82188e+06		1
55	56	PK:OmpA_41-1.2.56	OmpA_41-1	2	56	Omp.192.LYS.H	Omp.192.LYS.N	8.96984	124.045	21.9657	12.8109	100297448		153417		1
56	57	PK:OmpA_41-1.2.57	OmpA_41-1	2	57	Omp.240.THR.H	Omp.240.THR.N	8.70893	112.986	21.6385	12.2704	63344832		119374		1
57	58	PK:OmpA_41-1.2.58	OmpA_41-1	2	58	Omp.190.GLN.H	Omp.190.GLN.N	8.76192	124.452	19.9835	12.7816	117405576		1.3769e+06		1
58	59	PK:OmpA_41-1.2.59	OmpA_41-1	2	59	Omp.195.THR.H	Omp.195.THR.N	8.88815	118.883	22.0292	12.003	113002160		3.20345e+06		1
59	60	PK:OmpA_41-1.2.60	OmpA_41-1	2	60	Omp.217.LEU.H	Omp.217.LEU.N	7.90535	119.511	20.7454	12.1024	227020352		3.79376e+06		1
60	61	PK:OmpA_41-1.2.61	OmpA_41-1	2	61	Omp.278.GLY.H	Omp.278.GLY.N	9.30214	112.537	21.1504	11.8517	79596000		2.4349e+06		1
61	62	PK:OmpA_41-1.2.62	OmpA_41-1	2	62	Omp.241.ASP.H	Omp.241.ASP.N	7.0772	114.917	27.1504	16.6694	21185530		677668		1
62	63	PK:OmpA_41-1.2.63	OmpA_41-1	2	63	Omp.295.GLN.H	Omp.295.GLN.N	7.74491	120.317	18.716	12.0347	175900240		4.90063e+06		1
63	64	PK:OmpA_41-1.2.64	OmpA_41-1	2	64	Omp.286.THR.H	Omp.286.THR.N	10.1455	113.227	25.4197	12.7139	52396184		88256.6		1
64	65	PK:OmpA_41-1.2.65	OmpA_41-1	2	65	Omp.237.LEU.H	Omp.237.LEU.N	9.71195	127.817	23.6462	12.3752	75621312		2.31079e+06		1
65	66	PK:OmpA_41-1.2.66	OmpA_41-1	2	66	Omp.321.THR.H	Omp.321.THR.N	8.3075	119.318	0	0	None		95544.3		1
66	67	PK:OmpA_41-1.2.67	OmpA_41-1	2	67	Omp.244.GLY.H	Omp.244.GLY.N	8.51026	114.169	22.8846	12.6262	68215296		211982		1
67	68	PK:OmpA_41-1.2.68	OmpA_41-1	2	68	Omp.267.LYS.H	Omp.267.LYS.N	7.15749	119.461	19.8405	11.8597	95767184		2.83996e+06		1
68	69	PK:OmpA_41-1.2.69	OmpA_41-1	2	69	Omp.228.ASP.H	Omp.228.ASP.N	8.8694	127.542	19.8793	11.8771	96757384		299311		1
69	70	PK:OmpA_41-1.2.70	OmpA_41-1	2	70	Omp.271.ALA.H	Omp.271.ALA.N	8.66642	125.183	18.4175	14.5086	111498152		108156		1
70	71	PK:OmpA_41-1.2.71	OmpA_41-1	2	71	Omp.259.SER.H	Omp.259.SER.N	8.35428	116.47	18.6772	11.8663	120147520		3.54833e+06		1
71	72	PK:OmpA_41-1.2.72	OmpA_41-1	2	72	Omp.252.LEU.H	Omp.252.LEU.N	8.26828	122.895	20.4839	14.1134	52706080		1.02484e+06		1
72	73	PK:OmpA_41-1.2.73	OmpA_41-1	2	73	Omp.274.ILE.H	Omp.274.ILE.N	7.32485	116.72	21.18	11.5373	115867936		3.56195e+06		1
73	74	PK:OmpA_41-1.2.74	OmpA_41-1	2	74	Omp.325.ALA.H	Omp.325.ALA.N	8.01498	131.553	16.8886	11.5405	205770640		32110.5		1
74	75	PK:OmpA_41-1.2.75	OmpA_41-1	2	75	Omp.218.ASP.H	Omp.218.ASP.N	8.97275	123.506	17.6613	13.1036	94402968		2.79498e+06		1
75	76	PK:OmpA_41-1.2.76	OmpA_41-1	2	76	Omp.231.ASP.H	Omp.231.ASP.N	8.52193	117.36	20.9155	12.3496	214107696		568981		1
76	77	PK:OmpA_41-1.2.77	OmpA_41-1	2	77	Omp.246.ASP.H	Omp.246.ASP.N	8.79967	125.348	22.7149	17.0759	49207020		74696.3		1
77	78	PK:OmpA_41-1.2.78	OmpA_41-1	2	78	Omp.268.GLY.H	Omp.268.GLY.N	7.36125	102.932	20.8303	11.7879	73865256		2.15419e+06		1
78	79	PK:OmpA_41-1.2.79	OmpA_41-1	2	79	Omp.297.ALA.H	Omp.297.ALA.N	8.64136	120.647	19.8427	12.8917	139373600		188991		1
79	80	PK:OmpA_41-1.2.80	OmpA_41-1	2	80	Omp.232.GLY.H	Omp.232.GLY.N	7.99137	109.139	19.9263	12.3973	111527904		3.13548e+06		1
80	81	PK:OmpA_41-1.2.81	OmpA_41-1	2	81	Omp.320.VAL.H	Omp.320.VAL.N	8.30094	124.611	20.0522	12.7911	282877568		854066		1
81	82	PK:OmpA_41-1.2.82	OmpA_41-1	2	82	Omp.191.THR.H	Omp.191.THR.N	8.26001	116.883	25.8013	12.3717	115495944		3.33153e+06		1
82	83	PK:OmpA_41-1.2.83	OmpA_41-1	2	83	Omp.236.VAL.H	Omp.236.VAL.N	8.79668	127.636	21.8719	11.871	93746016		1.24652e+06		1
83	84	PK:OmpA_41-1.2.84	OmpA_41-1	2	84	Omp.310.GLU.H	Omp.310.GLU.N	9.6275	125.63	23.2202	12.5248	59819184		1.71727e+06		1
84	85	PK:OmpA_41-1.2.85	OmpA_41-1	2	85	Omp.299.LEU.H	Omp.299.LEU.N	8.66962	124.78	20.2756	16.1678	76528136		2.5368e+06		1
85	86	PK:OmpA_41-1.2.86	OmpA_41-1	2	86	Omp.258.GLN.H	Omp.258.GLN.N	8.48577	117.181	19.3066	12.281	89283720		1.0374e+06		1
86	87	PK:OmpA_41-1.2.87	OmpA_41-1	2	87	Omp.272.ASP.H	Omp.272.ASP.N	8.46957	110.913	18.9522	11.8759	132794680		3.66142e+06		1
87	88	PK:OmpA_41-1.2.88	OmpA_41-1	2	88	Omp.307.ARG.H	Omp.307.ARG.N	7.56381	117.217	20.3106	12.8271	60169616		1.78215e+06		1
88	89	PK:OmpA_41-1.2.89	OmpA_41-1	2	89	Omp.233.SER.H	Omp.233.SER.N	8.63986	116.109	21.0393	12.2103	103464384		2.97117e+06		1
89	90	PK:OmpA_41-1.2.90	OmpA_41-1	2	90	Omp.324.GLN.H	Omp.324.GLN.N	8.53732	121.455	18.631	15.8191	172164944		3.12608e+06		1
90	91	PK:OmpA_41-1.2.91	OmpA_41-1	2	91	Omp.260.VAL.H	Omp.260.VAL.N	7.62589	121.29	20.3692	11.7609	97363392		2.8933e+06		1
91	92	PK:OmpA_41-1.2.92	OmpA_41-1	2	92	Omp.309.VAL.H	Omp.309.VAL.N	9.00895	118.933	22.5487	12.5968	76070304		2.3972e+06		1
92	93	PK:OmpA_41-1.2.93	OmpA_41-1	2	93	Omp.287.GLY.H	Omp.287.GLY.N	7.29737	110.164	20.7035	11.6714	102010512		2.77591e+06		1
93	94	PK:OmpA_41-1.2.94	OmpA_41-1	2	94	Omp.313.VAL.H	Omp.313.VAL.N	9.15466	126.592	23.0495	12.5116	70294656		2.3486e+06		1
94	95	PK:OmpA_41-1.2.95	OmpA_41-1	2	95	Omp.279.MET.H	Omp.279.MET.N	8.89033	123.578	22.7285	12.3831	54401716		1.76385e+06		1
95	96	PK:OmpA_41-1.2.96	OmpA_41-1	2	96	Omp.319.VAL.H	Omp.319.VAL.N	8.17707	120.855	20.6833	14.1053	132703216		83697.6		1
96	97	PK:OmpA_41-1.2.97	OmpA_41-1	2	97	Omp.222.SER.H	Omp.222.SER.N	7.78301	113.322	19.6575	12.7623	121815128		3.62344e+06		1
97	98	PK:OmpA_41-1.2.98	OmpA_41-1	2	98	Omp.281.GLU.H	Omp.281.GLU.N	8.65133	122.577	21.4693	19.9335	81983056		754241		1
98	99	PK:OmpA_41-1.2.99	OmpA_41-1	2	99	Omp.199.ASP.H	Omp.199.ASP.N	9.08145	118.441	20.1311	12.3921	93052336		2.66002e+06		1
99	100	PK:OmpA_41-1.2.100	OmpA_41-1	2	100	Omp.189.VAL.H	Omp.189.VAL.N	8.2468	121.398	19.8933	13.7198	18548268		97308.5		1
100	101	PK:OmpA_41-1.2.101	OmpA_41-1	2	101	Omp.254.GLU.H	Omp.254.GLU.N	7.6145	125.128	20.294	12.2178	81853280		2.41155e+06		1
101	102	PK:OmpA_41-1.2.102	OmpA_41-1	2	102	Omp.216.ALA.H	Omp.216.ALA.N	7.51995	120.992	18.1864	12.3514	116116960		3.4965e+06		1
102	103	PK:OmpA_41-1.2.103	OmpA_41-1	2	103	Omp.197.LYS.H	Omp.197.LYS.N	8.85488	122.312	20.2851	12.0991	101287352		2.9565e+06		1
103	104	PK:OmpA_41-1.2.104	OmpA_41-1	2	104	Omp.317.LYS.H	Omp.317.LYS.N	8.18717	127.067	20.1252	12.0377	142043536		4.03323e+06		1
104	105	PK:OmpA_41-1.2.105	OmpA_41-1	2	105	Omp.212.GLU.H	Omp.212.GLU.N	10.0513	118.05	19.0795	12.2779	111506200		3.27993e+06		1
105	106	PK:OmpA_41-1.2.106	OmpA_41-1	2	106	Omp.247.ALA.H	Omp.247.ALA.N	8.4271	123.049	20.1288	13.7966	80444056		64645.7		1
106	107	PK:OmpA_41-1.2.107	OmpA_41-1	2	107	Omp.318.ASP.H	Omp.318.ASP.N	8.38121	122.634	18.7351	11.7255	260926416		2.0412e+06		1
107	108	PK:OmpA_41-1.2.108	OmpA_41-1	2	108	Omp.283.ASN.H	Omp.283.ASN.N	8.94413	114.457	21.0435	12.9683	67508312		14246.6		1
108	109	PK:OmpA_41-1.2.109	OmpA_41-1	2	109	Omp.253.SER.H	Omp.253.SER.N	8.44661	114.34	26.7553	13.7836	16419251		315110		1
109	110	PK:OmpA_41-1.2.110	OmpA_41-1	2	110	Omp.275.SER.H	Omp.275.SER.N	7.92684	118.265	21.2195	12.0485	94942168		2.77963e+06		1
110	111	PK:OmpA_41-1.2.111	OmpA_41-1	2	111	Omp.306.ASP.H	Omp.306.ASP.N	8.04046	112.464	19.369	12.603	74337168		2.2964e+06		1
111	112	PK:OmpA_41-1.2.112	OmpA_41-1	2	112	Omp.265.ILE.H	Omp.265.ILE.N	9.09182	122.663	20.2064	11.6519	90752048		2.71812e+06		1
112	113	PK:OmpA_41-1.2.113	OmpA_41-1	2	113	Omp.223.GLN.H	Omp.223.GLN.N	7.6541	118.64	20.3276	12.5014	98755448		2.93627e+06		1
113	114	PK:OmpA_41-1.2.114	OmpA_41-1	2	114	Omp.201.LEU.H	Omp.201.LEU.N	6.9023	115.337	19.7317	12.4311	71773400		2.0907e+06		1
114	115	PK:OmpA_41-1.2.115	OmpA_41-1	2	115	Omp.193.HIS.H	Omp.193.HIS.N	8.22795	120.816	20.907	12.8005	104740832		18869		1
115	116	PK:OmpA_41-1.2.116	OmpA_41-1	2	116	Omp.224.LEU.H	Omp.224.LEU.N	7.57494	117.935	19.8517	13.2036	96455864		2.92745e+06		1
116	117	PK:OmpA_41-1.2.117	OmpA_41-1	2	117	Omp.249.ASN.H	Omp.249.ASN.N	8.64663	119.594	19.1216	13.692	145507648		4.55873e+06		1
117	118	PK:OmpA_41-1.2.118	OmpA_41-1	2	118	Omp.261.VAL.H	Omp.261.VAL.N	8.09658	120.936	19.6356	13.6195	80891080		2.41915e+06		1
118	119	PK:OmpA_41-1.2.119	OmpA_41-1	2	119	Omp.255.ARG.H	Omp.255.ARG.N	8.10313	118.783	20.3181	13.2851	74446792		2.16789e+06		1
119	120	PK:OmpA_41-1.2.120	OmpA_41-1	2	120	Omp.289.THR.H	Omp.289.THR.N	8.58229	115.368	19.4206	12.4779	128873776		3.80576e+06		1
120	121	PK:OmpA_41-1.2.121	OmpA_41-1	2	121	Omp.300.ILE.H	Omp.300.ILE.N	8.28766	119.187	19.0463	11.7134	331197760		3.19531e+06		1
121	122	PK:OmpA_41-1.2.122	OmpA_41-1	2	122	Omp.215.ALA.H	Omp.215.ALA.N	7.80115	119.027	19.576	12.511	100460352		3.03393e+06		1
122	123	PK:OmpA_41-1.2.123	OmpA_41-1	2	123	Omp.291.ASP.H	Omp.291.ASP.N	8.61141	122.118	20.6039	12.8207	96446912		-52659		1
123	124	PK:OmpA_41-1.2.124	OmpA_41-1	2	124	Omp.262.ASP.H	Omp.262.ASP.N	9.2463	119.112	18.7875	12.2369	97666080		2.90377e+06		1
124	125	PK:OmpA_41-1.2.125	OmpA_41-1	2	125	Omp.273.LYS.H	Omp.273.LYS.N	7.8664	117.461	20.3995	15.8305	150120336		3.87286e+06		1
125	126	PK:OmpA_41-1.2.126	OmpA_41-1	2	126	Omp.296.ARG.H	Omp.296.ARG.N	8.73075	126.636	22.4053	13.1502	53053752		14370.6		1
126	127	PK:OmpA_41-1.2.127	OmpA_41-1	2	127	Omp.308.ARG.H	Omp.308.ARG.N	7.74456	124.344	21.4771	12.7023	66477092		1.96494e+06		1
127	128	PK:OmpA_41-1.2.128	OmpA_41-1	2	128			8.03858	121.146	21.3258	13.149	67378080		None		1

## Sheet: 500 eq
	#	Pid	Spectrum	PeakList	Id	Assign F1	Assign F2	Pos F1	Pos F2	LW F1 (Hz)	LW F2 (Hz)	Height	HeightError	Volume	VolumeError	Merit	Comment
0	1	PK:OmpA_51-1.2.1	OmpA_51-1	2	1	Omp.277.ARG.H	Omp.277.ARG.N	8.98809	119.716	20.7542	12.5045	78289032		2.85507e+06		1
1	2	PK:OmpA_51-1.2.2	OmpA_51-1	2	2	Omp.276.ALA.H	Omp.276.ALA.N	8.66473	123.042	0	14.4527	78787344		1.49782e+06		1
2	3	PK:OmpA_51-1.2.3	OmpA_51-1	2	3	Omp.234.VAL.H	Omp.234.VAL.N	9.01196	122.048	22.8473	12.0208	81841648		3225005		1
3	4	PK:OmpA_51-1.2.4	OmpA_51-1	2	4	Omp.227.LEU.H	Omp.227.LEU.N	7.4958	121.378	18.11	11.8436	141575392		1.32126e+06		1
4	5	PK:OmpA_51-1.2.5	OmpA_51-1	2	5	Omp.257.ALA.H	Omp.257.ALA.N	8.03901	121.147	22.409	13.6882	49504784		-10003.3		1
5	6	PK:OmpA_51-1.2.6	OmpA_51-1	2	6	Omp.282.SER.H	Omp.282.SER.N	7.93379	115.51	21.3396	12.1823	88297504		1.56162e+06		1
6	7	PK:OmpA_51-1.2.7	OmpA_51-1	2	7	Omp.315.GLY.H	Omp.315.GLY.N	8.41389	108.252	21.2913	12.1902	81831904		2.83926e+06		1
7	8	PK:OmpA_51-1.2.8	OmpA_51-1	2	8	Omp.251.GLY.H	Omp.251.GLY.N	7.81153	108.138	29.0888	19.0797	11946654		378679		1
8	9	PK:OmpA_51-1.2.9	OmpA_51-1	2	9	Omp.263.TYR.H	Omp.263.TYR.N	7.98199	121.742	19.5004	12.0344	79510240		2.94405e+06		1
9	10	PK:OmpA_51-1.2.10	OmpA_51-1	2	10	Omp.312.GLU.H	Omp.312.GLU.N	9.34174	128.015	21.0932	12.2854	66064580		2.48425e+06		1
10	11	PK:OmpA_51-1.2.11	OmpA_51-1	2	11	Omp.235.VAL.H	Omp.235.VAL.N	9.21262	129.772	22.0482	12.0134	83918368		3.25863e+06		1
11	12	PK:OmpA_51-1.2.12	OmpA_51-1	2	12	Omp.220.LEU.H	Omp.220.LEU.N	7.7407	121.598	19.8719	12.2469	76077480		2.84113e+06		1
12	13	PK:OmpA_51-1.2.13	OmpA_51-1	2	13	Omp.266.SER.H	Omp.266.SER.N	7.83194	118.888	0	0	None		3.22759e+06		1
13	14	PK:OmpA_51-1.2.14	OmpA_51-1	2	14	Omp.221.TYR.H	Omp.221.TYR.N	8.81686	119.411	19.3605	11.9881	73659888		2.60642e+06		1
14	15	PK:OmpA_51-1.2.15	OmpA_51-1	2	15	Omp.301.ASP.H	Omp.301.ASP.N	7.46808	119.291	17.9526	12.58	77889880		2.68036e+06		1
15	16	PK:OmpA_51-1.2.16	OmpA_51-1	2	16	Omp.250.GLN.H	Omp.250.GLN.N	8.65071	122.581	21.592	20.4677	63987892		295402		1
16	17	PK:OmpA_51-1.2.17	OmpA_51-1	2	17	Omp.196.LEU.H	Omp.196.LEU.N	9.35271	127.656	22.2548	15.5673	58595744		2.32471e+06		1
17	18	PK:OmpA_51-1.2.18	OmpA_51-1	2	18	Omp.210.LYS.H	Omp.210.LYS.N	8.46136	123.704	19.9839	12.2359	74225824		2.573e+06		1
18	19	PK:OmpA_51-1.2.19	OmpA_51-1	2	19	Omp.208.THR.H	Omp.208.THR.N	7.17788	110.013	20.3652	12.0425	100973744		3.41385e+06		1
19	20	PK:OmpA_51-1.2.20	OmpA_51-1	2	20	Omp.314.LYS.H	Omp.314.LYS.N	9.07187	128.098	21.6179	12.2674	72631408		2.6291e+06		1
20	21	PK:OmpA_51-1.2.21	OmpA_51-1	2	21	Omp.203.ASN.H	Omp.203.ASN.N	8.48949	119.613	24.1034	13.2494	95284552		3.08156e+06		1
21	22	PK:OmpA_51-1.2.22	OmpA_51-1	2	22	Omp.294.LYS.H	Omp.294.LYS.N	8.34566	124.898	29.2375	21.4668	21931852		3.48252e+06		1
22	23	PK:OmpA_51-1.2.23	OmpA_51-1	2	23	Omp.230.LYS.H	Omp.230.LYS.N	8.20423	118.301	20.5664	11.9533	112277240		3.96478e+06		1
23	24	PK:OmpA_51-1.2.24	OmpA_51-1	2	24	Omp.226.ASN.H	Omp.226.ASN.N	8.17994	119.823	20.2106	12.3295	119391272		17613.1		1
24	25	PK:OmpA_51-1.2.25	OmpA_51-1	2	25	Omp.202.PHE.H	Omp.202.PHE.N	7.77373	111.376	22.1124	12.1463	62974896		2.24989e+06		1
25	26	PK:OmpA_51-1.2.26	OmpA_51-1	2	26	Omp.214.GLN.H	Omp.214.GLN.N	7.7971	121.381	20.1496	15.3672	53793776		1.97914e+06		1
26	27	PK:OmpA_51-1.2.27	OmpA_51-1	2	27	Omp.311.ILE.H	Omp.311.ILE.N	9.37468	122.751	23.0443	11.9667	59841588		2.33942e+06		1
27	28	PK:OmpA_51-1.2.28	OmpA_51-1	2	28	Omp.316.ILE.H	Omp.316.ILE.N	7.94005	119.521	0	11.9733	93213952		457568		1
28	29	PK:OmpA_51-1.2.29	OmpA_51-1	2	29	Omp.288.ASN.H	Omp.288.ASN.N	9.05449	126.902	27.6217	18.2093	15926142		1.20793e+06		1
29	30	PK:OmpA_51-1.2.30	OmpA_51-1	2	30	Omp.205.ASN.H	Omp.205.ASN.N	8.58436	114.509	21.9136	12.1343	84580496		3443323		1
30	31	PK:OmpA_51-1.2.31	OmpA_51-1	2	31	Omp.238.GLY.H	Omp.238.GLY.N	8.58355	108.235	23.4634	12.3713	53957620		2.15522e+06		1
31	32	PK:OmpA_51-1.2.32	OmpA_51-1	2	32	Omp.245.SER.H	Omp.245.SER.N	8.28915	114.992	23.4993	12.324	55818852		2.10858e+06		1
32	33	PK:OmpA_51-1.2.33	OmpA_51-1	2	33	Omp.304.ALA.H	Omp.304.ALA.N	7.32029	122.983	18.8604	11.9598	69967800		2.58945e+06		1
33	34	PK:OmpA_51-1.2.34	OmpA_51-1	2	34	Omp.239.TYR.H	Omp.239.TYR.N	8.54309	122.342	21.323	14.2626	55979924		969189		1
34	35	PK:OmpA_51-1.2.35	OmpA_51-1	2	35	Omp.213.GLY.H	Omp.213.GLY.N	7.60345	110.384	20.0042	12.1573	68088464		2.38333e+06		1
35	36	PK:OmpA_51-1.2.36	OmpA_51-1	2	36	Omp.264.LEU.H	Omp.264.LEU.N	8.51425	120.575	20.2736	16.2539	55959636		2.15462e+06		1
36	37	PK:OmpA_51-1.2.37	OmpA_51-1	2	37	Omp.248.TYR.H	Omp.248.TYR.N	7.81752	120.748	24.4895	12.3186	82071112		3.18413e+06		1
37	38	PK:OmpA_51-1.2.38	OmpA_51-1	2	38	Omp.292.ASN.H	Omp.292.ASN.N	8.68464	121.547	23.27	16.7018	16746193		3403.89		1
38	39	PK:OmpA_51-1.2.39	OmpA_51-1	2	39	Omp.200.VAL.H	Omp.200.VAL.N	6.8546	116.787	21.9137	11.9578	58227112		2.11571e+06		1
39	40	PK:OmpA_51-1.2.40	OmpA_51-1	2	40	Omp.298.ALA.H	Omp.298.ALA.N	7.04778	119.101	20.1979	12.2646	94527720		3.42981e+06		1
40	41	PK:OmpA_51-1.2.41	OmpA_51-1	2	41	Omp.269.ILE.H	Omp.269.ILE.N	8.03932	125.146	20.1424	11.563	76689848		2.77207e+06		1
41	42	PK:OmpA_51-1.2.42	OmpA_51-1	2	42	Omp.219.GLN.H	Omp.219.GLN.N	7.69597	119.797	19.0544	12.3272	83495792		2.93773e+06		1
42	43	PK:OmpA_51-1.2.43	OmpA_51-1	2	43	Omp.209.LEU.H	Omp.209.LEU.N	8.8309	124.688	20.0546	12.2703	84372376		156038		1
43	44	PK:OmpA_51-1.2.44	OmpA_51-1	2	44	Omp.285.VAL.H	Omp.285.VAL.N	8.54951	124.632	22.322	12.0954	47630592		1.6315e+06		1
44	45	PK:OmpA_51-1.2.45	OmpA_51-1	2	45	Omp.290.CYS.H	Omp.290.CYS.N	8.52277	117.365	20.9461	12.8368	173881904		1.5618e+06		1
45	46	PK:OmpA_51-1.2.46	OmpA_51-1	2	46	Omp.225.SER.H	Omp.225.SER.N	7.1902	112.31	18.3939	12.4504	117098608		3.82339e+06		1
46	47	PK:OmpA_51-1.2.47	OmpA_51-1	2	47	Omp.293.VAL.H	Omp.293.VAL.N	7.37722	122.736	21.2997	11.3747	112293032		3.78463e+06		1
47	48	PK:OmpA_51-1.2.48	OmpA_51-1	2	48	Omp.256.ARG.H	Omp.256.ARG.N	8.48949	119.613	24.1034	13.2494	95284552		996686		1
48	49	PK:OmpA_51-1.2.49	OmpA_51-1	2	49	Omp.280.GLY.H	Omp.280.GLY.N	8.66767	110.665	20.5815	12.2494	41951056		1.65885e+06		1
49	50	PK:OmpA_51-1.2.50	OmpA_51-1	2	50	Omp.303.LEU.H	Omp.303.LEU.N	8.05871	114.824	20.5573	12.9034	53720084		2.01524e+06		1
50	51	PK:OmpA_51-1.2.51	OmpA_51-1	2	51	Omp.198.SER.H	Omp.198.SER.N	8.64163	123.185	22.047	14.4527	78787344		501003		1
51	52	PK:OmpA_51-1.2.52	OmpA_51-1	2	52	Omp.194.PHE.H	Omp.194.PHE.N	9.07002	122.332	22.9405	12.6505	57120564		2.15697e+06		1
52	53	PK:OmpA_51-1.2.53	OmpA_51-1	2	53	Omp.204.PHE.H	Omp.204.PHE.N	7.46466	120.515	18.5062	12.3439	81924656		2.96542e+06		1
53	54	PK:OmpA_51-1.2.54	OmpA_51-1	2	54	Omp.302.CYS.H	Omp.302.CYS.N	8.40919	122.597	28.1305	14.4403	82360488		-1789.48		1
54	55	PK:OmpA_51-1.2.55	OmpA_51-1	2	55	Omp.322.GLN.H	Omp.322.GLN.N	8.38976	124.235	18.958	11.6047	290145920		9.82188e+06		1
55	56	PK:OmpA_51-1.2.56	OmpA_51-1	2	56	Omp.192.LYS.H	Omp.192.LYS.N	8.97027	124.057	22.1144	12.6478	82916936		153417		1
56	57	PK:OmpA_51-1.2.57	OmpA_51-1	2	57	Omp.240.THR.H	Omp.240.THR.N	8.70871	112.996	21.887	12.6035	53548884		119374		1
57	58	PK:OmpA_51-1.2.58	OmpA_51-1	2	58	Omp.190.GLN.H	Omp.190.GLN.N	8.76283	124.459	20.8247	12.9011	92878248		1.3769e+06		1
58	59	PK:OmpA_51-1.2.59	OmpA_51-1	2	59	Omp.195.THR.H	Omp.195.THR.N	8.88905	118.874	22.3137	11.7984	90250680		3.20345e+06		1
59	60	PK:OmpA_51-1.2.60	OmpA_51-1	2	60	Omp.217.LEU.H	Omp.217.LEU.N	7.90682	119.514	21.5318	12.4993	181012928		3.79376e+06		1
60	61	PK:OmpA_51-1.2.61	OmpA_51-1	2	61	Omp.278.GLY.H	Omp.278.GLY.N	9.30376	112.539	21.0928	11.613	69547872		2.4349e+06		1
61	62	PK:OmpA_51-1.2.62	OmpA_51-1	2	62	Omp.241.ASP.H	Omp.241.ASP.N	7.07413	114.932	23.1967	14.1781	20244564		677668		1
62	63	PK:OmpA_51-1.2.63	OmpA_51-1	2	63	Omp.295.GLN.H	Omp.295.GLN.N	7.74633	120.319	19.0827	12.2127	143880832		4.90063e+06		1
63	64	PK:OmpA_51-1.2.64	OmpA_51-1	2	64	Omp.286.THR.H	Omp.286.THR.N	10.1472	113.235	24.3481	12.2115	44289004		88256.6		1
64	65	PK:OmpA_51-1.2.65	OmpA_51-1	2	65	Omp.237.LEU.H	Omp.237.LEU.N	9.71484	127.821	21.264	12.696	60353420		2.31079e+06		1
65	66	PK:OmpA_51-1.2.66	OmpA_51-1	2	66	Omp.321.THR.H	Omp.321.THR.N	8.3075	119.318	0	0	None		95544.3		1
66	67	PK:OmpA_51-1.2.67	OmpA_51-1	2	67	Omp.244.GLY.H	Omp.244.GLY.N	8.51103	114.157	22.1926	12.7721	55411592		211982		1
67	68	PK:OmpA_51-1.2.68	OmpA_51-1	2	68	Omp.267.LYS.H	Omp.267.LYS.N	7.15861	119.461	21.1233	12.1569	76371784		2.83996e+06		1
68	69	PK:OmpA_51-1.2.69	OmpA_51-1	2	69	Omp.228.ASP.H	Omp.228.ASP.N	8.87017	127.538	20.3492	11.8201	79274920		299311		1
69	70	PK:OmpA_51-1.2.70	OmpA_51-1	2	70	Omp.271.ALA.H	Omp.271.ALA.N	8.66766	125.183	18.406	14.682	92971336		108156		1
70	71	PK:OmpA_51-1.2.71	OmpA_51-1	2	71	Omp.259.SER.H	Omp.259.SER.N	8.35521	116.471	18.4251	11.7374	100883288		3.54833e+06		1
71	72	PK:OmpA_51-1.2.72	OmpA_51-1	2	72	Omp.252.LEU.H	Omp.252.LEU.N	8.26884	122.906	22.4472	15.1497	42337540		1.02484e+06		1
72	73	PK:OmpA_51-1.2.73	OmpA_51-1	2	73	Omp.274.ILE.H	Omp.274.ILE.N	7.32567	116.722	21.2488	11.502	95317576		3.56195e+06		1
73	74	PK:OmpA_51-1.2.74	OmpA_51-1	2	74	Omp.325.ALA.H	Omp.325.ALA.N	8.01551	131.555	16.8349	11.6141	173843872		32110.5		1
74	75	PK:OmpA_51-1.2.75	OmpA_51-1	2	75	Omp.218.ASP.H	Omp.218.ASP.N	8.97378	123.515	18.3357	13.4721	76639952		2.79498e+06		1
75	76	PK:OmpA_51-1.2.76	OmpA_51-1	2	76	Omp.231.ASP.H	Omp.231.ASP.N	8.52277	117.365	20.9461	12.8368	173881904		568981		1
76	77	PK:OmpA_51-1.2.77	OmpA_51-1	2	77	Omp.246.ASP.H	Omp.246.ASP.N	8.79873	125.336	21.5225	15.871	40493436		74696.3		1
77	78	PK:OmpA_51-1.2.78	OmpA_51-1	2	78	Omp.268.GLY.H	Omp.268.GLY.N	7.36198	102.926	21.35	12.6629	60831128		2.15419e+06		1
78	79	PK:OmpA_51-1.2.79	OmpA_51-1	2	79	Omp.297.ALA.H	Omp.297.ALA.N	8.64672	120.641	20.03	13.042	106999536		188991		1
79	80	PK:OmpA_51-1.2.80	OmpA_51-1	2	80	Omp.232.GLY.H	Omp.232.GLY.N	7.99211	109.138	19.4074	12.1362	90553120		3.13548e+06		1
80	81	PK:OmpA_51-1.2.81	OmpA_51-1	2	81	Omp.320.VAL.H	Omp.320.VAL.N	8.30152	124.614	20.9077	12.4501	236608336		854066		1
81	82	PK:OmpA_51-1.2.82	OmpA_51-1	2	82	Omp.191.THR.H	Omp.191.THR.N	8.26062	116.898	24.5626	12.5348	95818912		3.33153e+06		1
82	83	PK:OmpA_51-1.2.83	OmpA_51-1	2	83	Omp.236.VAL.H	Omp.236.VAL.N	8.79768	127.639	21.3103	12.144	72223632		1.24652e+06		1
83	84	PK:OmpA_51-1.2.84	OmpA_51-1	2	84	Omp.310.GLU.H	Omp.310.GLU.N	9.62959	125.639	21.8158	12.2535	48941296		1.71727e+06		1
84	85	PK:OmpA_51-1.2.85	OmpA_51-1	2	85	Omp.299.LEU.H	Omp.299.LEU.N	8.67132	124.783	21.4493	17.1059	65235784		2.5368e+06		1
85	86	PK:OmpA_51-1.2.86	OmpA_51-1	2	86	Omp.258.GLN.H	Omp.258.GLN.N	8.48684	117.186	19.441	12.8379	71921344		1.0374e+06		1
86	87	PK:OmpA_51-1.2.87	OmpA_51-1	2	87	Omp.272.ASP.H	Omp.272.ASP.N	8.47054	110.913	19.7051	11.9108	105911576		3.66142e+06		1
87	88	PK:OmpA_51-1.2.88	OmpA_51-1	2	88	Omp.307.ARG.H	Omp.307.ARG.N	7.564	117.227	20.1961	13.6275	50330732		1.78215e+06		1
88	89	PK:OmpA_51-1.2.89	OmpA_51-1	2	89	Omp.233.SER.H	Omp.233.SER.N	8.64121	116.106	21.863	12.3982	79904480		2.97117e+06		1
89	90	PK:OmpA_51-1.2.90	OmpA_51-1	2	90	Omp.324.GLN.H	Omp.324.GLN.N	8.5383	121.463	18.6081	15.0745	143452496		3.12608e+06		1
90	91	PK:OmpA_51-1.2.91	OmpA_51-1	2	91	Omp.260.VAL.H	Omp.260.VAL.N	7.6262	121.285	20.4615	12.0524	78880368		2.8933e+06		1
91	92	PK:OmpA_51-1.2.92	OmpA_51-1	2	92	Omp.309.VAL.H	Omp.309.VAL.N	9.01078	118.934	21.7565	12.456	61855828		2.3972e+06		1
92	93	PK:OmpA_51-1.2.93	OmpA_51-1	2	93	Omp.287.GLY.H	Omp.287.GLY.N	7.29804	110.166	20.3481	11.8386	86837960		2.77591e+06		1
93	94	PK:OmpA_51-1.2.94	OmpA_51-1	2	94	Omp.313.VAL.H	Omp.313.VAL.N	9.15741	126.6	21.3754	12.4021	59456816		2.3486e+06		1
94	95	PK:OmpA_51-1.2.95	OmpA_51-1	2	95	Omp.279.MET.H	Omp.279.MET.N	8.89106	123.567	23.7891	13.2437	46279848		1.76385e+06		1
95	96	PK:OmpA_51-1.2.96	OmpA_51-1	2	96	Omp.319.VAL.H	Omp.319.VAL.N	8.17814	120.855	19.7993	14.1911	107161152		83697.6		1
96	97	PK:OmpA_51-1.2.97	OmpA_51-1	2	97	Omp.222.SER.H	Omp.222.SER.N	7.78418	113.327	19.5695	12.4297	105178120		3.62344e+06		1
97	98	PK:OmpA_51-1.2.98	OmpA_51-1	2	98	Omp.281.GLU.H	Omp.281.GLU.N	8.65071	122.581	21.592	20.4677	63987892		754241		1
98	99	PK:OmpA_51-1.2.99	OmpA_51-1	2	99	Omp.199.ASP.H	Omp.199.ASP.N	9.08161	118.441	19.428	12.8534	75196760		2.66002e+06		1
99	100	PK:OmpA_51-1.2.100	OmpA_51-1	2	100	Omp.189.VAL.H	Omp.189.VAL.N	8.2462	121.42	20.4329	14.026	11700498		97308.5		1
100	101	PK:OmpA_51-1.2.101	OmpA_51-1	2	101	Omp.254.GLU.H	Omp.254.GLU.N	7.61537	125.126	19.6055	12.3802	65409044		2.41155e+06		1
101	102	PK:OmpA_51-1.2.102	OmpA_51-1	2	102	Omp.216.ALA.H	Omp.216.ALA.N	7.52089	120.995	17.9919	13.075	97749232		3.4965e+06		1
102	103	PK:OmpA_51-1.2.103	OmpA_51-1	2	103	Omp.197.LYS.H	Omp.197.LYS.N	8.85552	122.318	19.8235	12.7482	78427960		2.9565e+06		1
103	104	PK:OmpA_51-1.2.104	OmpA_51-1	2	104	Omp.317.LYS.H	Omp.317.LYS.N	8.18794	127.067	19.9824	12.098	114920664		4.03323e+06		1
104	105	PK:OmpA_51-1.2.105	OmpA_51-1	2	105	Omp.212.GLU.H	Omp.212.GLU.N	10.0515	118.052	19.6363	12.2459	90569152		3.27993e+06		1
105	106	PK:OmpA_51-1.2.106	OmpA_51-1	2	106	Omp.247.ALA.H	Omp.247.ALA.N	8.42672	123.067	19.9573	15.0171	63142580		64645.7		1
106	107	PK:OmpA_51-1.2.107	OmpA_51-1	2	107	Omp.318.ASP.H	Omp.318.ASP.N	8.38219	122.634	18.9533	11.6751	212277344		2.0412e+06		1
107	108	PK:OmpA_51-1.2.108	OmpA_51-1	2	108	Omp.283.ASN.H	Omp.283.ASN.N	8.94506	114.461	20.7048	12.361	59386164		14246.6		1
108	109	PK:OmpA_51-1.2.109	OmpA_51-1	2	109	Omp.253.SER.H	Omp.253.SER.N	8.44673	114.348	31.936	16.5514	12054633		315110		1
109	110	PK:OmpA_51-1.2.110	OmpA_51-1	2	110	Omp.275.SER.H	Omp.275.SER.N	7.92789	118.26	21.7591	11.9718	73515728		2.77963e+06		1
110	111	PK:OmpA_51-1.2.111	OmpA_51-1	2	111	Omp.306.ASP.H	Omp.306.ASP.N	8.04192	112.465	20.1959	12.2446	66291972		2.2964e+06		1
111	112	PK:OmpA_51-1.2.112	OmpA_51-1	2	112	Omp.265.ILE.H	Omp.265.ILE.N	9.09224	122.668	20.7356	11.9681	73919952		2.71812e+06		1
112	113	PK:OmpA_51-1.2.113	OmpA_51-1	2	113	Omp.223.GLN.H	Omp.223.GLN.N	7.65437	118.643	20.6079	12.2227	82413920		2.93627e+06		1
113	114	PK:OmpA_51-1.2.114	OmpA_51-1	2	114	Omp.201.LEU.H	Omp.201.LEU.N	6.90158	115.343	20.5844	12.4058	58079420		2.0907e+06		1
114	115	PK:OmpA_51-1.2.115	OmpA_51-1	2	115	Omp.193.HIS.H	Omp.193.HIS.N	8.22621	120.834	21.0366	12.6104	89781656		18869		1
115	116	PK:OmpA_51-1.2.116	OmpA_51-1	2	116	Omp.224.LEU.H	Omp.224.LEU.N	7.57595	117.934	20.5362	13.5489	76063800		2.92745e+06		1
116	117	PK:OmpA_51-1.2.117	OmpA_51-1	2	117	Omp.249.ASN.H	Omp.249.ASN.N	8.64823	119.6	19.0407	12.9375	124525800		4.55873e+06		1
117	118	PK:OmpA_51-1.2.118	OmpA_51-1	2	118	Omp.261.VAL.H	Omp.261.VAL.N	8.09839	120.929	18.4379	13.4208	63728596		2.41915e+06		1
118	119	PK:OmpA_51-1.2.119	OmpA_51-1	2	119	Omp.255.ARG.H	Omp.255.ARG.N	8.10271	118.788	20.8009	13.5323	62933740		2.16789e+06		1
119	120	PK:OmpA_51-1.2.120	OmpA_51-1	2	120	Omp.289.THR.H	Omp.289.THR.N	8.58311	115.366	20.3388	12.8567	109192688		3.80576e+06		1
120	121	PK:OmpA_51-1.2.121	OmpA_51-1	2	121	Omp.300.ILE.H	Omp.300.ILE.N	8.28822	119.187	19.264	11.7689	265010096		3.19531e+06		1
121	122	PK:OmpA_51-1.2.122	OmpA_51-1	2	122	Omp.215.ALA.H	Omp.215.ALA.N	7.80127	119.028	18.6447	12.9765	83618824		3.03393e+06		1
122	123	PK:OmpA_51-1.2.123	OmpA_51-1	2	123	Omp.291.ASP.H	Omp.291.ASP.N	8.61234	122.116	20.0565	13.5255	73760032		-52659		1
123	124	PK:OmpA_51-1.2.124	OmpA_51-1	2	124	Omp.262.ASP.H	Omp.262.ASP.N	9.24676	119.114	19.0233	13.0069	77223272		2.90377e+06		1
124	125	PK:OmpA_51-1.2.125	OmpA_51-1	2	125	Omp.273.LYS.H	Omp.273.LYS.N	7.86697	117.461	21.026	15.0929	125603672		3.87286e+06		1
125	126	PK:OmpA_51-1.2.126	OmpA_51-1	2	126	Omp.296.ARG.H	Omp.296.ARG.N	8.73221	126.638	21.7396	12.8707	45109620		14370.6		1
126	127	PK:OmpA_51-1.2.127	OmpA_51-1	2	127	Omp.308.ARG.H	Omp.308.ARG.N	7.74537	124.342	21.0403	12.0532	54871448		1.96494e+06		1
127	128	PK:OmpA_51-1.2.128	OmpA_51-1	2	128			8.03901	121.147	22.409	13.6882	49504784		None		1
