# Supplementary material for: Defining the function of OmpA in the Rcs stress response
Source: eLife journal article supplement (doi:10.7554/elife.60861), 2020-09-28
Supplement: supp [file elife-60861-supp-v1.zip › elife_poa_e60861_Figure_5_source_data_1.xlsx]

## Sheet: Feuil1
IPTG (µM)	IgaA-RcsF	OmpA-RcsF	ref peak
0	101.849	4980.72	9041.33
50	206.092	2942.06	9609.45
250	735.87	1700.7	9388.91
IPTG (µM)	IgaA-RcsF	OmpA-RcsF
0	1.12648	55.0884
50	2.14468	30.6164
250	7.83765	18.1139
IPTG (µM)
0	1.12648
50	2.14468	IgaA-RcsF		1.12648	2.14468	7.83765	55.0884	30.6164	18.1139
250	7.83765			0	50	250	0	50	250
0	55.0884
50	30.6164	OmpA-RcsF
250	18.1139
