# Supplementary material for: Defining the function of OmpA in the Rcs stress response
Source: eLife journal article supplement (doi:10.7554/elife.60861), 2020-09-28
Supplement: supp [file elife-60861-supp-v1.zip › elife_poa_e60861_Figure_5_source_data_2.xlsx]

## Sheet: Preprocessed Data_2020_06_22 11
	Sample ID: IgA		Sample ID: IgA		Sample ID: IgA		Sample ID: IgA		Sample ID: IgA
Sample Conc: 30	Conc Unit: nM	Sample Conc: 20	Conc Unit: nM	Sample Conc: 13.3	Conc Unit: nM	Sample Conc: 8.88	Conc Unit: nM	Sample Conc: 5.92	Conc Unit: nM
time (sec)	Response (nm)	time (sec)	Response (nm)	time (sec)	Response (nm)	time (sec)	Response (nm)	time (sec)	Response (nm)
600	0.00058912	600	-0.00141667	600	-0.00094577	600	0.00025874	600	0.00169838
600.2	0.00230029	600.2	-0.00064249	600.2	0.00279462	600.2	0.00176713	600.2	-8e-05
600.4	0.00524576	600.4	-0.00133037	600.4	0.0017374	600.4	-0.0021003	600.4	-0.0008198
600.6	0.00356143	600.6	0.00156207	600.6	0.00729513	600.6	0.00153291	600.6	8.523e-05
600.8	0.00231653	600.8	0.0018456	600.8	0.00533999	600.8	-0.00157804	600.8	0.00512614
601	0.0036518	601	1.101e-05	601	0.00231456	601	0.00010324	601	-0.00045318
601.2	0.00594601	601.2	-0.00242099	601.2	0.00448957	601.2	0.00024586	601.2	0.00377246
601.4	0.00610165	601.4	0.00326545	601.4	0.00393671	601.4	-0.0019702	601.4	0.00055407
601.6	0.00764641	601.6	0.00277321	601.6	0.00563536	601.6	-0.00112897	601.6	0.00259683
601.8	0.00545172	601.8	0.00045694	601.8	0.00111595	601.8	0.00016716	601.8	0.00163136
602	0.010292	602	0.0044007	602	0.00248047	602	0.00051	602	0.00487753
602.2	0.0105732	602.2	0.00844341	602.2	0.0054696	602.2	0.00120371	602.2	0.00363945
602.4	0.013672	602.4	0.00306377	602.4	0.00707101	602.4	-0.00222797	602.4	0.00017308
602.6	0.0075968	602.6	0.00443837	602.6	0.00342643	602.6	0.00354215	602.6	0.00094299
602.8	0.0108165	602.8	0.00484496	602.8	0.00528821	602.8	0.00103268	602.8	0.00183614
603	0.0135758	603	0.00186395	603	0.00774673	603	0.00176317	603	0.00261318
603.2	0.0137447	603.2	0.0084746	603.2	0.00908569	603.2	0.00424486	603.2	0.00305585
603.4	0.010165	603.4	0.00865484	603.4	0.00495332	603.4	-0.00206475	603.4	0.00226864
603.6	0.0119219	603.6	0.00364371	603.6	0.00472251	603.6	0.00015762	603.6	0.00093587
603.8	0.0171447	603.8	0.00681743	603.8	0.00842393	603.8	-0.00170986	603.8	0.00527966
604	0.0113942	604	0.00035763	604	0.00545796	604	0.00184361	604	0.00267363
604.2	0.0138153	604.2	0.00778869	604.2	0.00573214	604.2	0.00144356	604.2	0.00206918
604.4	0.0166544	604.4	0.00807034	604.4	0.00499209	604.4	0.00112201	604.4	0.00794668
604.6	0.0167898	604.6	0.00802887	604.6	0.00967856	604.6	-0.00014299	604.6	0.00308852
604.8	0.0119363	604.8	0.00826263	604.8	0.00588516	604.8	0.0011029	604.8	-0.00051616
605	0.0163726	605	0.00603421	605	0.00974509	605	0.0063497	605	0.00547742
605.2	0.0120385	605.2	0.00769985	605.2	0.00867103	605.2	0.00494209	605.2	0.00371593
605.4	0.0129472	605.4	0.00835807	605.4	0.0101536	605.4	0.00013081	605.4	0.00312547
605.6	0.0192907	605.6	0.00880877	605.6	0.00785686	605.6	0.00376855	605.6	-8.693e-05
605.8	0.0187567	605.8	0.0094268	605.8	0.00722759	605.8	0.00464517	605.8	0.00158973
606	0.018911	606	0.0121021	606	0.0101522	606	0.0056873	606	0.00383095
606.2	0.0141587	606.2	0.0108795	606.2	0.00906271	606.2	0.00293066	606.2	-0.00027411
606.4	0.0206466	606.4	0.0107369	606.4	0.0061194	606.4	0.0044999	606.4	0.00098372
606.6	0.0190171	606.6	0.0127348	606.6	0.00919846	606.6	0.00315783	606.6	0.00658185
606.8	0.0184716	606.8	0.0124183	606.8	0.00681291	606.8	0.00390311	606.8	0.00176793
607	0.0210649	607	0.0114213	607	0.0106198	607	0.00353993	607	0.00148732
607.2	0.024473	607.2	0.00688415	607.2	0.00766967	607.2	0.00427134	607.2	0.00294484
607.4	0.0166557	607.4	0.0107437	607.4	0.00872141	607.4	-0.0002791	607.4	7.427e-05
607.6	0.0220477	607.6	0.0107613	607.6	0.007195	607.6	0.00261644	607.6	0.00620109
607.8	0.0246045	607.8	0.0121879	607.8	0.00915754	607.8	0.00414159	607.8	0.00305675
608	0.0217995	608	0.0126726	608	0.0080424	608	0.00220994	608	0.00358888
608.2	0.0287332	608.2	0.0131151	608.2	0.00623231	608.2	0.00137399	608.2	0.00148386
608.4	0.0198039	608.4	0.0122729	608.4	0.00559989	608.4	0.00259003	608.4	0.00148535
608.6	0.0268949	608.6	0.0106314	608.6	0.010584	608.6	0.00120034	608.6	-0.00026563
608.8	0.0233781	608.8	0.0129655	608.8	0.0135878	608.8	0.00435052	608.8	0.00475279
609	0.0225557	609	0.0136358	609	0.0140986	609	0.00385398	609	0.00438595
609.2	0.0278413	609.2	0.0109503	609.2	0.0113969	609.2	0.00217425	609.2	0.00531806
609.4	0.0282019	609.4	0.0140387	609.4	0.0120752	609.4	0.0027047	609.4	0.00645759
609.6	0.0251144	609.6	0.0164803	609.6	0.0108646	609.6	0.00192721	609.6	0.00645252
609.8	0.0286957	609.8	0.0145911	609.8	0.00885922	609.8	0.00410384	609.8	-0.00010613
610	0.0270509	610	0.0177369	610	0.00991961	610	0.00286007	610	0.00543089
610.2	0.0283233	610.2	0.0165227	610.2	0.00576073	610.2	0.00212696	610.2	0.0040145
610.4	0.0307881	610.4	0.0183168	610.4	0.00604285	610.4	0.00209317	610.4	0.00131892
610.6	0.0297715	610.6	0.014637	610.6	0.0146798	610.6	0.0081172	610.6	0.00353112
610.8	0.0280887	610.8	0.014799	610.8	0.0083311	610.8	0.00649411	610.8	0.00725205
611	0.0259565	611	0.0166679	611	0.00902971	611	0.00167286	611	0.00567718
611.2	0.0295752	611.2	0.0179516	611.2	0.0108946	611.2	0.00514316	611.2	0.00532621
611.4	0.0301113	611.4	0.0129873	611.4	0.00926033	611.4	0.00379637	611.4	0.00519
611.6	0.0299942	611.6	0.0183159	611.6	0.0117253	611.6	0.00401095	611.6	0.00195591
611.8	0.0316983	611.8	0.0206801	611.8	0.0102913	611.8	0.0079621	611.8	0.00375254
612	0.0295529	612	0.0196129	612	0.0142215	612	0.00605367	612	0.00688729
612.2	0.0353775	612.2	0.0194915	612.2	0.00942643	612.2	0.0033143	612.2	0.00293839
612.4	0.0321884	612.4	0.0181342	612.4	0.0109776	612.4	0.00313324	612.4	0.00534731
612.6	0.0352159	612.6	0.01896	612.6	0.0130861	612.6	0.00527741	612.6	0.00650141
612.8	0.0321678	612.8	0.0220122	612.8	0.0116407	612.8	0.00475257	612.8	0.00470919
613	0.0332885	613	0.0177701	613	0.0146343	613	0.00775808	613	0.0064385
613.2	0.0361872	613.2	0.0193148	613.2	0.0146746	613.2	0.00537618	613.2	0.00787005
613.4	0.0362124	613.4	0.0196042	613.4	0.0143071	613.4	0.00800773	613.4	0.00461413
613.6	0.0384656	613.6	0.0211435	613.6	0.0146097	613.6	0.00722766	613.6	0.00584475
613.8	0.0333588	613.8	0.0196528	613.8	0.0142066	613.8	0.00740889	613.8	0.00087833
614	0.0384539	614	0.022163	614	0.0142892	614	0.00646263	614	0.00319083
614.2	0.0389731	614.2	0.0233958	614.2	0.00838323	614.2	0.00548641	614.2	0.00289915
614.4	0.0364024	614.4	0.021789	614.4	0.0151785	614.4	0.00673805	614.4	0.00740659
614.6	0.035181	614.6	0.0227825	614.6	0.0180076	614.6	0.00341282	614.6	0.0043212
614.8	0.0348873	614.8	0.0245873	614.8	0.0171288	614.8	0.00721904	614.8	0.00424853
615	0.038277	615	0.0237095	615	0.0129543	615	0.00746267	615	0.00281128
615.2	0.0396544	615.2	0.0213274	615.2	0.0162156	615.2	0.00405272	615.2	0.00525028
615.4	0.0380356	615.4	0.0215048	615.4	0.0143247	615.4	0.00127914	615.4	0.00555991
615.6	0.0422606	615.6	0.022836	615.6	0.0130388	615.6	0.00363016	615.6	0.00554905
615.8	0.0420442	615.8	0.0186379	615.8	0.0148295	615.8	0.00510704	615.8	0.00403177
616	0.0321163	616	0.0253427	616	0.0148559	616	0.00789185	616	0.00698134
616.2	0.0422993	616.2	0.0207346	616.2	0.0174974	616.2	0.00844673	616.2	0.00481068
616.4	0.0424332	616.4	0.024297	616.4	0.0181868	616.4	0.00609127	616.4	0.00578877
616.6	0.040896	616.6	0.0246403	616.6	0.0159242	616.6	0.00613891	616.6	0.00781003
616.8	0.0408363	616.8	0.0247845	616.8	0.0183846	616.8	0.00586923	616.8	0.0046887
617	0.0404246	617	0.0235876	617	0.0176351	617	0.00762243	617	0.00623439
617.2	0.0428034	617.2	0.0244138	617.2	0.0180969	617.2	0.00941831	617.2	0.00830525
617.4	0.0417544	617.4	0.0225877	617.4	0.0154312	617.4	0.00435611	617.4	0.00461669
617.6	0.0428526	617.6	0.0253535	617.6	0.0162894	617.6	0.0106977	617.6	0.00768664
617.8	0.0422787	617.8	0.0230161	617.8	0.0171814	617.8	0.00386774	617.8	0.00926233
618	0.0442789	618	0.0246155	618	0.0174113	618	0.0120151	618	0.00821012
618.2	0.0431779	618.2	0.0266936	618.2	0.0193724	618.2	0.0103783	618.2	0.00667559
618.4	0.0446728	618.4	0.0246544	618.4	0.0167316	618.4	0.00448001	618.4	0.00793625
618.6	0.0444899	618.6	0.0282316	618.6	0.0158436	618.6	0.00874321	618.6	0.00198799
618.8	0.0447871	618.8	0.0270848	618.8	0.0231667	618.8	0.00702482	618.8	0.00256901
619	0.0435644	619	0.0234208	619	0.0152263	619	0.00833879	619	0.00816807
619.2	0.0424174	619.2	0.0254509	619.2	0.0177714	619.2	0.00894789	619.2	0.0108305
619.4	0.0527079	619.4	0.0267603	619.4	0.0177438	619.4	0.00556334	619.4	0.00638645
619.6	0.0465442	619.6	0.0231652	619.6	0.0157369	619.6	0.00822427	619.6	0.00733312
619.8	0.0475952	619.8	0.0299879	619.8	0.01814	619.8	0.00717273	619.8	0.00565795
620	0.0508473	620	0.0283219	620	0.0202346	620	0.00905417	620	0.00733482
620.2	0.051326	620.2	0.0286683	620.2	0.0199309	620.2	0.0104805	620.2	0.00638131
620.4	0.0471163	620.4	0.0268625	620.4	0.0183167	620.4	0.00801024	620.4	0.00843522
620.6	0.0470703	620.6	0.0281422	620.6	0.0196553	620.6	0.00843509	620.6	0.00483046
620.8	0.0509549	620.8	0.0295164	620.8	0.0156205	620.8	0.00930141	620.8	0.0105429
621	0.0490302	621	0.0300323	621	0.0219633	621	0.008349	621	0.00709591
621.2	0.0526613	621.2	0.0292466	621.2	0.0196226	621.2	0.0112575	621.2	0.0111708
621.4	0.051902	621.4	0.0255071	621.4	0.0221799	621.4	0.00844829	621.4	0.00699146
621.6	0.0502325	621.6	0.0309792	621.6	0.015275	621.6	0.0118977	621.6	0.0109581
621.8	0.0517102	621.8	0.0288922	621.8	0.0231946	621.8	0.0102973	621.8	0.0100008
622	0.05508	622	0.0273871	622	0.0176585	622	0.00804536	622	0.00777659
622.2	0.0517068	622.2	0.0314926	622.2	0.0203773	622.2	0.00883372	622.2	0.00540364
622.4	0.0568595	622.4	0.033993	622.4	0.0209091	622.4	0.0106139	622.4	0.00736381
622.6	0.0530871	622.6	0.0341062	622.6	0.016629	622.6	0.00804847	622.6	0.00449114
622.8	0.049931	622.8	0.0344911	622.8	0.0206471	622.8	0.0126854	622.8	0.00956698
623	0.0545648	623	0.0346953	623	0.0203044	623	0.00821736	623	0.0123493
623.2	0.0530976	623.2	0.0316666	623.2	0.0242337	623.2	0.00805915	623.2	0.00640137
623.4	0.0570544	623.4	0.035596	623.4	0.0188483	623.4	0.0115347	623.4	0.0122114
623.6	0.056322	623.6	0.0303645	623.6	0.0252099	623.6	0.0142808	623.6	0.0102632
623.8	0.0567589	623.8	0.0338524	623.8	0.0212061	623.8	0.0145798	623.8	0.00759083
624	0.0562928	624	0.0284097	624	0.0236294	624	0.00754688	624	0.0101178
624.2	0.0523932	624.2	0.0340212	624.2	0.0216516	624.2	0.00744167	624.2	0.00674145
624.4	0.0588176	624.4	0.0301736	624.4	0.0198509	624.4	0.00734024	624.4	0.00963439
624.6	0.0593345	624.6	0.0311338	624.6	0.0214594	624.6	0.0100598	624.6	0.0142871
624.8	0.056734	624.8	0.031076	624.8	0.0221478	624.8	0.010361	624.8	0.00982059
625	0.0593867	625	0.0370732	625	0.0228729	625	0.00688113	625	0.00620804
625.2	0.0601585	625.2	0.0357927	625.2	0.0225054	625.2	0.0111052	625.2	0.011514
625.4	0.0578736	625.4	0.0354694	625.4	0.0242581	625.4	0.0137659	625.4	0.00568022
625.6	0.0578505	625.6	0.0336911	625.6	0.0215529	625.6	0.00798888	625.6	0.00441864
625.8	0.0624057	625.8	0.0366841	625.8	0.0237038	625.8	0.00977157	625.8	0.00672885
626	0.0594956	626	0.0384388	626	0.024365	626	0.0119256	626	0.00848116
626.2	0.063101	626.2	0.0365265	626.2	0.0225062	626.2	0.014397	626.2	0.00776819
626.4	0.0610989	626.4	0.0377948	626.4	0.0233783	626.4	0.0160688	626.4	0.0109804
626.6	0.0617053	626.6	0.0361351	626.6	0.0232691	626.6	0.0116602	626.6	0.0092059
626.8	0.063607	626.8	0.0377605	626.8	0.0218017	626.8	0.00747114	626.8	0.00792935
627	0.0626854	627	0.0358195	627	0.0245028	627	0.0139051	627	0.00912762
627.2	0.0660386	627.2	0.0366165	627.2	0.0219441	627.2	0.0133119	627.2	0.0100334
627.4	0.0634308	627.4	0.03543	627.4	0.0237958	627.4	0.0126535	627.4	0.00596533
627.6	0.0705602	627.6	0.036979	627.6	0.0262871	627.6	0.0126101	627.6	0.00391584
627.8	0.06263	627.8	0.0403008	627.8	0.0246666	627.8	0.0113766	627.8	0.00748356
628	0.0626044	628	0.036164	628	0.0257008	628	0.0100927	628	0.00972346
628.2	0.0636578	628.2	0.0405344	628.2	0.0235851	628.2	0.0123374	628.2	0.0103102
628.4	0.0639638	628.4	0.0414348	628.4	0.0272753	628.4	0.0136241	628.4	0.00975231
628.6	0.0679346	628.6	0.0415703	628.6	0.0216882	628.6	0.00798953	628.6	0.0127577
628.8	0.0683257	628.8	0.0381893	628.8	0.0252935	628.8	0.0146517	628.8	0.00850386
629	0.0636991	629	0.0420288	629	0.0219353	629	0.0166844	629	0.00882893
629.2	0.0687256	629.2	0.0414919	629.2	0.0205245	629.2	0.0142018	629.2	0.0120487
629.4	0.0672834	629.4	0.0415715	629.4	0.0209309	629.4	0.0078905	629.4	0.0125806
629.6	0.0644604	629.6	0.0384997	629.6	0.0244579	629.6	0.0141774	629.6	0.0103338
629.8	0.0668262	629.8	0.0423188	629.8	0.0224314	629.8	0.0136093	629.8	0.00870799
630	0.0695003	630	0.0417608	630	0.0294306	630	0.0139035	630	0.0123134
630.2	0.0711822	630.2	0.0413345	630.2	0.0272003	630.2	0.0127118	630.2	0.00930551
630.4	0.0660649	630.4	0.0404029	630.4	0.0243934	630.4	0.0131099	630.4	0.0106185
630.6	0.0705801	630.6	0.0420524	630.6	0.0252121	630.6	0.0143958	630.6	0.00906507
630.8	0.0703843	630.8	0.0425344	630.8	0.0255172	630.8	0.0155672	630.8	0.0126722
631	0.0718509	631	0.0411963	631	0.0244993	631	0.012203	631	0.0108924
631.2	0.0701635	631.2	0.0464349	631.2	0.0246168	631.2	0.0148663	631.2	0.00713765
631.4	0.0709466	631.4	0.0418634	631.4	0.025812	631.4	0.00852363	631.4	0.0082159
631.6	0.0680836	631.6	0.0450544	631.6	0.026614	631.6	0.0154428	631.6	0.0125193
631.8	0.0747966	631.8	0.0461333	631.8	0.0244271	631.8	0.0119825	631.8	0.0112464
632	0.0712042	632	0.0430547	632	0.0226264	632	0.013881	632	0.00893106
632.2	0.0750508	632.2	0.0465003	632.2	0.0316827	632.2	0.0185563	632.2	0.00824698
632.4	0.0778122	632.4	0.0441254	632.4	0.0256819	632.4	0.0159691	632.4	0.0116245
632.6	0.0752005	632.6	0.0466643	632.6	0.0258409	632.6	0.0137568	632.6	0.00947982
632.8	0.0732964	632.8	0.0462249	632.8	0.0262335	632.8	0.0159863	632.8	0.008819
633	0.0753182	633	0.0458615	633	0.0273706	633	0.0154279	633	0.0117626
633.2	0.0764249	633.2	0.0448919	633.2	0.0303811	633.2	0.0131136	633.2	0.00732266
633.4	0.0737715	633.4	0.0449526	633.4	0.0261367	633.4	0.0164349	633.4	0.0125312
633.6	0.0739604	633.6	0.0448558	633.6	0.027508	633.6	0.0159342	633.6	0.0120144
633.8	0.0737682	633.8	0.0467077	633.8	0.0225063	633.8	0.013368	633.8	0.0103878
634	0.0738371	634	0.0467356	634	0.0262162	634	0.011789	634	0.0113379
634.2	0.0768358	634.2	0.0506256	634.2	0.0315673	634.2	0.01592	634.2	0.0107762
634.4	0.0775029	634.4	0.0452311	634.4	0.0263587	634.4	0.0135038	634.4	0.0139307
634.6	0.0810447	634.6	0.0473613	634.6	0.0264493	634.6	0.0114044	634.6	0.0093196
634.8	0.076727	634.8	0.0478881	634.8	0.0248716	634.8	0.0116421	634.8	0.0139526
635	0.0794074	635	0.0493583	635	0.0286464	635	0.0160042	635	0.0116513
635.2	0.0778129	635.2	0.0447853	635.2	0.0288842	635.2	0.0162899	635.2	0.00816724
635.4	0.0801702	635.4	0.0500138	635.4	0.0302735	635.4	0.0144338	635.4	0.00984256
635.6	0.0808562	635.6	0.0477499	635.6	0.0292584	635.6	0.0153927	635.6	0.0112327
635.8	0.0803804	635.8	0.0490462	635.8	0.0277304	635.8	0.0171824	635.8	0.0103697
636	0.0845956	636	0.049511	636	0.0321041	636	0.0118632	636	0.0104309
636.2	0.0829981	636.2	0.0480669	636.2	0.029378	636.2	0.0157489	636.2	0.00975019
636.4	0.0810076	636.4	0.0501677	636.4	0.0307687	636.4	0.0168225	636.4	0.0155786
636.6	0.0809278	636.6	0.0483765	636.6	0.0278765	636.6	0.01551	636.6	0.00962262
636.8	0.0811116	636.8	0.0487086	636.8	0.0264166	636.8	0.0173844	636.8	0.0123456
637	0.0814408	637	0.0495988	637	0.0318936	637	0.0150373	637	0.0101364
637.2	0.083039	637.2	0.0515331	637.2	0.0282486	637.2	0.0172489	637.2	0.00804499
637.4	0.0832873	637.4	0.0501706	637.4	0.0296361	637.4	0.0165133	637.4	0.013129
637.6	0.0850227	637.6	0.0503788	637.6	0.0263193	637.6	0.0164821	637.6	0.0126847
637.8	0.083797	637.8	0.0497661	637.8	0.0317075	637.8	0.0167767	637.8	0.0071374
638	0.0833858	638	0.0492699	638	0.0297425	638	0.0181404	638	0.0144949
638.2	0.0827806	638.2	0.0518928	638.2	0.0263381	638.2	0.0171055	638.2	0.0102037
638.4	0.0851615	638.4	0.050383	638.4	0.0318889	638.4	0.0181483	638.4	0.00881951
638.6	0.0836978	638.6	0.0504151	638.6	0.0361667	638.6	0.0147255	638.6	0.016095
638.8	0.0852612	638.8	0.0535142	638.8	0.0297389	638.8	0.0189937	638.8	0.0117359
639	0.0866394	639	0.0487189	639	0.0343125	639	0.0142105	639	0.011966
639.2	0.085876	639.2	0.0536717	639.2	0.0304651	639.2	0.0200322	639.2	0.010893
639.4	0.085773	639.4	0.051074	639.4	0.0344879	639.4	0.0184911	639.4	0.0109209
639.6	0.0848194	639.6	0.056781	639.6	0.0324987	639.6	0.0142037	639.6	0.0112472
639.8	0.0876629	639.8	0.0467942	639.8	0.0321259	639.8	0.018426	639.8	0.0147244
640	0.0898327	640	0.0507252	640	0.0307018	640	0.0213163	640	0.0136401
640.2	0.0875339	640.2	0.0532029	640.2	0.0343683	640.2	0.0167727	640.2	0.00834491
640.4	0.086014	640.4	0.052476	640.4	0.0312702	640.4	0.0155289	640.4	0.0119574
640.6	0.0896157	640.6	0.0518909	640.6	0.0312002	640.6	0.0191999	640.6	0.0141879
640.8	0.0882302	640.8	0.0547238	640.8	0.0297413	640.8	0.0176701	640.8	0.0124164
641	0.0874909	641	0.0495536	641	0.0316985	641	0.0156226	641	0.0153312
641.2	0.0889418	641.2	0.0527723	641.2	0.0339009	641.2	0.0190291	641.2	0.00983461
641.4	0.0908255	641.4	0.0532583	641.4	0.0304216	641.4	0.0180939	641.4	0.011318
641.6	0.0913178	641.6	0.0572714	641.6	0.0322004	641.6	0.0194358	641.6	0.0164158
641.8	0.0918293	641.8	0.0532867	641.8	0.0317611	641.8	0.0196753	641.8	0.0091267
642	0.0882275	642	0.0575309	642	0.0317448	642	0.0193586	642	0.0199533
642.2	0.090303	642.2	0.0543613	642.2	0.0323809	642.2	0.0166802	642.2	0.0132931
642.4	0.0904147	642.4	0.0528297	642.4	0.0318735	642.4	0.019581	642.4	0.00925637
642.6	0.0908443	642.6	0.05813	642.6	0.0352719	642.6	0.0193981	642.6	0.012536
642.8	0.0875732	642.8	0.0585257	642.8	0.0286979	642.8	0.0205666	642.8	0.013485
643	0.0956156	643	0.0570391	643	0.0346953	643	0.0183903	643	0.0120466
643.2	0.0953162	643.2	0.0570411	643.2	0.0330156	643.2	0.0188877	643.2	0.0132458
643.4	0.093542	643.4	0.0577616	643.4	0.0337974	643.4	0.0181095	643.4	0.0134348
643.6	0.0937611	643.6	0.0608014	643.6	0.0343902	643.6	0.0196986	643.6	0.0128901
643.8	0.0997778	643.8	0.0566359	643.8	0.0360949	643.8	0.0205373	643.8	0.0141496
644	0.096816	644	0.0617209	644	0.0343128	644	0.0216663	644	0.0113746
644.2	0.0945697	644.2	0.0587021	644.2	0.0365859	644.2	0.0206312	644.2	0.0143415
644.4	0.0952198	644.4	0.0620612	644.4	0.032917	644.4	0.0194364	644.4	0.0134098
644.6	0.0995742	644.6	0.0591096	644.6	0.0372233	644.6	0.0198062	644.6	0.0111346
644.8	0.096435	644.8	0.0590697	644.8	0.035776	644.8	0.0189404	644.8	0.0134095
645	0.0976526	645	0.0595724	645	0.0358059	645	0.022398	645	0.015479
645.2	0.0945976	645.2	0.0605329	645.2	0.0382793	645.2	0.0176067	645.2	0.0149476
645.4	0.0909242	645.4	0.0600404	645.4	0.0367632	645.4	0.0172796	645.4	0.0160601
645.6	0.0956122	645.6	0.0594135	645.6	0.0337277	645.6	0.019062	645.6	0.0151415
645.8	0.0973774	645.8	0.0605747	645.8	0.0379427	645.8	0.0207921	645.8	0.0134793
646	0.0980948	646	0.0572086	646	0.0308322	646	0.0233008	646	0.0156151
646.2	0.095869	646.2	0.0611869	646.2	0.0346692	646.2	0.0222073	646.2	0.0156037
646.4	0.0989235	646.4	0.0603438	646.4	0.0328593	646.4	0.0221338	646.4	0.0148548
646.6	0.101618	646.6	0.0622126	646.6	0.0377874	646.6	0.0180116	646.6	0.0158708
646.8	0.0997595	646.8	0.0602855	646.8	0.0327384	646.8	0.0238025	646.8	0.0142846
647	0.0967918	647	0.0591687	647	0.0343182	647	0.016394	647	0.017148
647.2	0.0955761	647.2	0.0619145	647.2	0.0385643	647.2	0.0173013	647.2	0.0127574
647.4	0.100334	647.4	0.0594948	647.4	0.035429	647.4	0.0187854	647.4	0.0144086
647.6	0.101071	647.6	0.0634592	647.6	0.0372353	647.6	0.021551	647.6	0.0168367
647.8	0.100786	647.8	0.0642905	647.8	0.0339059	647.8	0.0214859	647.8	0.0133218
648	0.102827	648	0.0648417	648	0.0359168	648	0.0233476	648	0.0128981
648.2	0.0995506	648.2	0.0630261	648.2	0.0365844	648.2	0.024917	648.2	0.0119732
648.4	0.102463	648.4	0.064267	648.4	0.0383524	648.4	0.0205239	648.4	0.0171521
648.6	0.10091	648.6	0.0598256	648.6	0.0377057	648.6	0.0188202	648.6	0.0149188
648.8	0.105193	648.8	0.0649043	648.8	0.0371676	648.8	0.0252709	648.8	0.0146916
649	0.101034	649	0.0661143	649	0.0348995	649	0.0208892	649	0.0136144
649.2	0.101515	649.2	0.0643438	649.2	0.0387197	649.2	0.0236926	649.2	0.00899588
649.4	0.103191	649.4	0.0644061	649.4	0.0358804	649.4	0.0237735	649.4	0.0155361
649.6	0.10758	649.6	0.0662815	649.6	0.0411357	649.6	0.0207879	649.6	0.0159958
649.8	0.104531	649.8	0.0651297	649.8	0.034928	649.8	0.022343	649.8	0.0133741
650	0.0997774	650	0.0639236	650	0.0358686	650	0.0204192	650	0.0181661
650.2	0.10312	650.2	0.0676233	650.2	0.038288	650.2	0.0261103	650.2	0.0167907
650.4	0.10475	650.4	0.0656544	650.4	0.0391919	650.4	0.0189175	650.4	0.0141996
650.6	0.105786	650.6	0.0643084	650.6	0.0393297	650.6	0.0186783	650.6	0.013046
650.8	0.108533	650.8	0.0604287	650.8	0.0415245	650.8	0.0202221	650.8	0.0184727
651	0.105975	651	0.0668206	651	0.0408248	651	0.0182499	651	0.0166929
651.2	0.107247	651.2	0.0710045	651.2	0.032528	651.2	0.0251109	651.2	0.0164481
651.4	0.110555	651.4	0.0665685	651.4	0.0367693	651.4	0.0190568	651.4	0.0166651
651.6	0.110093	651.6	0.0636323	651.6	0.0415047	651.6	0.0219559	651.6	0.0152441
651.8	0.106713	651.8	0.0664521	651.8	0.036952	651.8	0.021035	651.8	0.0123709
652	0.106225	652	0.0677109	652	0.0391613	652	0.0212167	652	0.01276
652.2	0.108182	652.2	0.0713539	652.2	0.0375749	652.2	0.0217068	652.2	0.0141714
652.4	0.112367	652.4	0.0681342	652.4	0.0378946	652.4	0.0219039	652.4	0.0162974
652.6	0.103917	652.6	0.0672339	652.6	0.0376545	652.6	0.0222104	652.6	0.0158224
652.8	0.107962	652.8	0.0657587	652.8	0.0390069	652.8	0.0227754	652.8	0.0176471
653	0.109547	653	0.0712643	653	0.0409034	653	0.0224386	653	0.0175458
653.2	0.112296	653.2	0.0699761	653.2	0.0403296	653.2	0.0234827	653.2	0.0129109
653.4	0.108607	653.4	0.0681703	653.4	0.039845	653.4	0.0229799	653.4	0.0163
653.6	0.113519	653.6	0.0672669	653.6	0.0380928	653.6	0.0257959	653.6	0.0127911
653.8	0.112075	653.8	0.0660821	653.8	0.0392925	653.8	0.0242089	653.8	0.0198095
654	0.110564	654	0.0677263	654	0.0429507	654	0.0225826	654	0.0177398
654.2	0.112718	654.2	0.0657456	654.2	0.0425882	654.2	0.0220826	654.2	0.01417
654.4	0.112703	654.4	0.0723895	654.4	0.0393288	654.4	0.0225191	654.4	0.0161877
654.6	0.112719	654.6	0.0698402	654.6	0.0381406	654.6	0.0204649	654.6	0.0173671
654.8	0.110913	654.8	0.0681681	654.8	0.0412047	654.8	0.0217552	654.8	0.0166682
655	0.113048	655	0.0691067	655	0.0398846	655	0.0236776	655	0.0144937
655.2	0.117008	655.2	0.069963	655.2	0.0414713	655.2	0.0232838	655.2	0.0169612
655.4	0.114328	655.4	0.070307	655.4	0.0414665	655.4	0.0257198	655.4	0.0180675
655.6	0.114982	655.6	0.0725968	655.6	0.0392199	655.6	0.0233155	655.6	0.0156907
655.8	0.113757	655.8	0.0722122	655.8	0.0400239	655.8	0.0264554	655.8	0.0201075
656	0.116298	656	0.0726546	656	0.0403556	656	0.0254707	656	0.0211809
656.2	0.118696	656.2	0.0654793	656.2	0.0435536	656.2	0.0260367	656.2	0.0212493
656.4	0.118143	656.4	0.0710285	656.4	0.0414743	656.4	0.0198206	656.4	0.0149593
656.6	0.11663	656.6	0.0693131	656.6	0.0399091	656.6	0.0234123	656.6	0.0195698
656.8	0.116952	656.8	0.0689399	656.8	0.0412183	656.8	0.0244957	656.8	0.0128312
657	0.116421	657	0.0733185	657	0.041648	657	0.0200367	657	0.0184536
657.2	0.112989	657.2	0.0735819	657.2	0.0418383	657.2	0.0262284	657.2	0.0166134
657.4	0.116822	657.4	0.07355	657.4	0.0439331	657.4	0.0269245	657.4	0.0161559
657.6	0.116997	657.6	0.0746312	657.6	0.0419185	657.6	0.0233781	657.6	0.0156404
657.8	0.121225	657.8	0.0771104	657.8	0.0430929	657.8	0.0213337	657.8	0.0192268
658	0.118191	658	0.0775736	658	0.0462369	658	0.0218492	658	0.0149778
658.2	0.119045	658.2	0.0754357	658.2	0.043468	658.2	0.0219719	658.2	0.0166556
658.4	0.11777	658.4	0.0744881	658.4	0.0429749	658.4	0.0250742	658.4	0.0146642
658.6	0.12349	658.6	0.0670917	658.6	0.045952	658.6	0.0237892	658.6	0.0180416
658.8	0.118564	658.8	0.0780409	658.8	0.0435163	658.8	0.0233479	658.8	0.0189554
659	0.121731	659	0.075057	659	0.0465609	659	0.0218009	659	0.0170127
659.2	0.123567	659.2	0.0768925	659.2	0.0416078	659.2	0.0277349	659.2	0.0182534
659.4	0.120511	659.4	0.0740347	659.4	0.0437458	659.4	0.0299999	659.4	0.0182736
659.6	0.124289	659.6	0.0737676	659.6	0.0418066	659.6	0.0267479	659.6	0.0190751
659.8	0.121582	659.8	0.0751352	659.8	0.0448104	659.8	0.0258764	659.8	0.0147982
660	0.124497	660	0.0770772	660	0.0427061	660	0.0248226	660	0.0183047
660.2	0.128179	660.2	0.0779874	660.2	0.0442707	660.2	0.0272332	660.2	0.0163767
660.4	0.121536	660.4	0.0763927	660.4	0.0462509	660.4	0.0270566	660.4	0.013997
660.6	0.121392	660.6	0.078451	660.6	0.0447175	660.6	0.0280498	660.6	0.0158655
660.8	0.124279	660.8	0.0776978	660.8	0.0425256	660.8	0.0261886	660.8	0.0175118
661	0.127906	661	0.0795733	661	0.0423635	661	0.0269798	661	0.0166106
661.2	0.122969	661.2	0.0773239	661.2	0.0444029	661.2	0.0239224	661.2	0.019396
661.4	0.123133	661.4	0.0774828	661.4	0.0416661	661.4	0.0262133	661.4	0.0188796
661.6	0.124982	661.6	0.0804124	661.6	0.0481922	661.6	0.0250289	661.6	0.0159564
661.8	0.125631	661.8	0.0777958	661.8	0.0435303	661.8	0.0237496	661.8	0.0161091
662	0.124372	662	0.0773886	662	0.0452152	662	0.0272569	662	0.0222694
662.2	0.123949	662.2	0.0778577	662.2	0.0443628	662.2	0.0250484	662.2	0.0185854
662.4	0.124726	662.4	0.081563	662.4	0.0424912	662.4	0.024864	662.4	0.0186966
662.6	0.126862	662.6	0.0795488	662.6	0.0436692	662.6	0.0291787	662.6	0.0149064
662.8	0.125742	662.8	0.0812972	662.8	0.0438156	662.8	0.0287355	662.8	0.017207
663	0.130415	663	0.0792713	663	0.0524873	663	0.0284314	663	0.0177257
663.2	0.128087	663.2	0.0785509	663.2	0.0464393	663.2	0.025336	663.2	0.021656
663.4	0.132245	663.4	0.0827894	663.4	0.0469201	663.4	0.0286874	663.4	0.0175565
663.6	0.129547	663.6	0.0808933	663.6	0.0447827	663.6	0.0280873	663.6	0.0204734
663.8	0.128225	663.8	0.0838544	663.8	0.0459107	663.8	0.0272446	663.8	0.0174851
664	0.132926	664	0.0787043	664	0.0448115	664	0.0273297	664	0.0197669
664.2	0.132919	664.2	0.0804399	664.2	0.044494	664.2	0.0302737	664.2	0.019916
664.4	0.133268	664.4	0.0806998	664.4	0.0455304	664.4	0.0256624	664.4	0.0227307
664.6	0.133294	664.6	0.0808555	664.6	0.0432351	664.6	0.0290378	664.6	0.0206579
664.8	0.12909	664.8	0.0786989	664.8	0.0463558	664.8	0.0285851	664.8	0.017132
665	0.133493	665	0.0826611	665	0.0438893	665	0.0289934	665	0.0183768
665.2	0.135746	665.2	0.0803787	665.2	0.0454644	665.2	0.0238895	665.2	0.017949
665.4	0.129248	665.4	0.0831334	665.4	0.0433289	665.4	0.0295785	665.4	0.0193388
665.6	0.129981	665.6	0.0837398	665.6	0.0483068	665.6	0.0237361	665.6	0.0203381
665.8	0.132026	665.8	0.0812773	665.8	0.0442643	665.8	0.0267469	665.8	0.0208336
666	0.134829	666	0.0869396	666	0.0439983	666	0.029735	666	0.0206376
666.2	0.135735	666.2	0.082548	666.2	0.0476666	666.2	0.0286241	666.2	0.018721
666.4	0.13293	666.4	0.0879725	666.4	0.0491482	666.4	0.0328063	666.4	0.0174007
666.6	0.138724	666.6	0.08476	666.6	0.0506892	666.6	0.0263271	666.6	0.0220209
666.8	0.137013	666.8	0.0866871	666.8	0.0476896	666.8	0.0285196	666.8	0.0185413
667	0.132887	667	0.084669	667	0.0424389	667	0.0294959	667	0.0184616
667.2	0.133628	667.2	0.0808059	667.2	0.0497068	667.2	0.0253831	667.2	0.0229171
667.4	0.139902	667.4	0.0804279	667.4	0.0495969	667.4	0.0298121	667.4	0.0200648
667.6	0.133264	667.6	0.0811903	667.6	0.0484604	667.6	0.0284496	667.6	0.0205893
667.8	0.136028	667.8	0.0832068	667.8	0.0488781	667.8	0.0277748	667.8	0.0216717
668	0.135342	668	0.0824913	668	0.0487207	668	0.027225	668	0.0209627
668.2	0.13664	668.2	0.0867688	668.2	0.0484674	668.2	0.0325569	668.2	0.0208561
668.4	0.137637	668.4	0.0838426	668.4	0.051006	668.4	0.0305637	668.4	0.0182943
668.6	0.138768	668.6	0.0844097	668.6	0.0461327	668.6	0.0277075	668.6	0.0160723
668.8	0.134729	668.8	0.0844168	668.8	0.0492009	668.8	0.0262617	668.8	0.0195143
669	0.137042	669	0.0873553	669	0.0498879	669	0.0276374	669	0.0185376
669.2	0.138206	669.2	0.0835553	669.2	0.048648	669.2	0.0278308	669.2	0.022104
669.4	0.139589	669.4	0.0878726	669.4	0.0495598	669.4	0.0268513	669.4	0.0218241
669.6	0.142021	669.6	0.0852134	669.6	0.0501361	669.6	0.0289594	669.6	0.0205581
669.8	0.139886	669.8	0.0859459	669.8	0.0493151	669.8	0.0290486	669.8	0.0208634
670	0.141947	670	0.0854417	670	0.0484079	670	0.0311579	670	0.0202016
670.2	0.138835	670.2	0.0891063	670.2	0.0503381	670.2	0.0285157	670.2	0.0192589
670.4	0.141627	670.4	0.0854805	670.4	0.0532194	670.4	0.0302321	670.4	0.0198609
670.6	0.145258	670.6	0.0886881	670.6	0.0507366	670.6	0.0311569	670.6	0.0171766
670.8	0.141308	670.8	0.0843256	670.8	0.047577	670.8	0.0293424	670.8	0.0186361
671	0.140895	671	0.0902814	671	0.0495195	671	0.0341098	671	0.0195093
671.2	0.144938	671.2	0.0895236	671.2	0.0499699	671.2	0.0286775	671.2	0.0270044
671.4	0.142631	671.4	0.0885351	671.4	0.0509479	671.4	0.0312511	671.4	0.0202469
671.6	0.14102	671.6	0.0867401	671.6	0.053743	671.6	0.0301304	671.6	0.0209533
671.8	0.141076	671.8	0.0856201	671.8	0.0494125	671.8	0.0300936	671.8	0.0168678
672	0.142615	672	0.0878797	672	0.0478693	672	0.0324287	672	0.0235319
672.2	0.145226	672.2	0.0869442	672.2	0.0506279	672.2	0.0292824	672.2	0.0197855
672.4	0.144982	672.4	0.0885582	672.4	0.0485219	672.4	0.0279917	672.4	0.0193512
672.6	0.14801	672.6	0.0917692	672.6	0.0504716	672.6	0.029924	672.6	0.0216171
672.8	0.146579	672.8	0.0888109	672.8	0.0480267	672.8	0.0310089	672.8	0.0266222
673	0.149681	673	0.093856	673	0.0546417	673	0.0295664	673	0.0237557
673.2	0.147672	673.2	0.0900988	673.2	0.0511311	673.2	0.0313275	673.2	0.0193179
673.4	0.146295	673.4	0.0943108	673.4	0.053664	673.4	0.0296945	673.4	0.0185879
673.6	0.146851	673.6	0.0870071	673.6	0.0498697	673.6	0.028748	673.6	0.0208023
673.8	0.145791	673.8	0.0936158	673.8	0.0547141	673.8	0.0293108	673.8	0.0217665
674	0.150718	674	0.0925544	674	0.0530817	674	0.0290866	674	0.0235592
674.2	0.147163	674.2	0.0925717	674.2	0.0549296	674.2	0.031796	674.2	0.0222307
674.4	0.146193	674.4	0.0915766	674.4	0.0538204	674.4	0.0281095	674.4	0.0212643
674.6	0.147925	674.6	0.0940126	674.6	0.0543932	674.6	0.0285892	674.6	0.0215772
674.8	0.148585	674.8	0.0929766	674.8	0.0512431	674.8	0.0303193	674.8	0.0214813
675	0.148273	675	0.0940919	675	0.0538681	675	0.0299103	675	0.0188392
675.2	0.147639	675.2	0.0963912	675.2	0.0580901	675.2	0.0318615	675.2	0.0195502
675.4	0.149219	675.4	0.0909213	675.4	0.055179	675.4	0.0293672	675.4	0.0199231
675.6	0.150518	675.6	0.0919415	675.6	0.0565223	675.6	0.0287367	675.6	0.0249815
675.8	0.150681	675.8	0.0964468	675.8	0.0551162	675.8	0.0327902	675.8	0.0214634
676	0.153003	676	0.0950087	676	0.0539275	676	0.0279615	676	0.0181914
676.2	0.153914	676.2	0.0970933	676.2	0.0524093	676.2	0.0294615	676.2	0.0212898
676.4	0.151621	676.4	0.0963342	676.4	0.0514939	676.4	0.0310245	676.4	0.0206565
676.6	0.150845	676.6	0.0950106	676.6	0.0567662	676.6	0.0325691	676.6	0.0196587
676.8	0.15506	676.8	0.0915968	676.8	0.0522462	676.8	0.0322783	676.8	0.0218075
677	0.152654	677	0.0926153	677	0.0561087	677	0.0328999	677	0.022491
677.2	0.15287	677.2	0.094591	677.2	0.0541209	677.2	0.0313425	677.2	0.0217101
677.4	0.156268	677.4	0.0954632	677.4	0.0536924	677.4	0.0338373	677.4	0.0247858
677.6	0.153009	677.6	0.0959134	677.6	0.0550129	677.6	0.0322858	677.6	0.0234942
677.8	0.154874	677.8	0.0976703	677.8	0.0552584	677.8	0.0315024	677.8	0.0189019
678	0.152847	678	0.0990262	678	0.0515238	678	0.0341547	678	0.0219857
678.2	0.148176	678.2	0.0951937	678.2	0.0572931	678.2	0.0295286	678.2	0.0220559
678.4	0.153059	678.4	0.0944003	678.4	0.0557106	678.4	0.0327112	678.4	0.0199032
678.6	0.154283	678.6	0.0991845	678.6	0.0539082	678.6	0.0336031	678.6	0.0203806
678.8	0.155537	678.8	0.0987958	678.8	0.0541291	678.8	0.0343684	678.8	0.0227894
679	0.159427	679	0.0956941	679	0.0571476	679	0.0350202	679	0.0175189
679.2	0.157413	679.2	0.0976277	679.2	0.0554129	679.2	0.0316947	679.2	0.0224088
679.4	0.152926	679.4	0.0944912	679.4	0.0548907	679.4	0.0330703	679.4	0.0206519
679.6	0.156632	679.6	0.0968187	679.6	0.0505343	679.6	0.0318655	679.6	0.0222252
679.8	0.15701	679.8	0.100047	679.8	0.0558603	679.8	0.0343579	679.8	0.0213311
680	0.159748	680	0.0957121	680	0.0555781	680	0.0320241	680	0.0219883
680.2	0.158212	680.2	0.096281	680.2	0.0556403	680.2	0.0337448	680.2	0.0251725
680.4	0.159621	680.4	0.0998042	680.4	0.0566547	680.4	0.0363163	680.4	0.0232488
680.6	0.159238	680.6	0.0988751	680.6	0.0559783	680.6	0.0341184	680.6	0.0207369
680.8	0.160871	680.8	0.0964778	680.8	0.0552591	680.8	0.0336865	680.8	0.0198139
681	0.156685	681	0.100797	681	0.0560402	681	0.0312137	681	0.026475
681.2	0.163643	681.2	0.0991406	681.2	0.055302	681.2	0.034139	681.2	0.0209402
681.4	0.16094	681.4	0.105682	681.4	0.0593194	681.4	0.0374533	681.4	0.0241032
681.6	0.159678	681.6	0.0985865	681.6	0.0550613	681.6	0.0306295	681.6	0.0253323
681.8	0.163463	681.8	0.0967711	681.8	0.0567373	681.8	0.0318927	681.8	0.021628
682	0.158386	682	0.0985808	682	0.0578491	682	0.033673	682	0.0263903
682.2	0.161596	682.2	0.0998996	682.2	0.0595035	682.2	0.0355428	682.2	0.0229904
682.4	0.158911	682.4	0.0988395	682.4	0.0576134	682.4	0.036386	682.4	0.0251727
682.6	0.1575	682.6	0.0995132	682.6	0.0594647	682.6	0.0372024	682.6	0.0167375
682.8	0.161378	682.8	0.0991792	682.8	0.0570027	682.8	0.0306388	682.8	0.0243906
683	0.159193	683	0.100125	683	0.0583398	683	0.0364702	683	0.0222262
683.2	0.160096	683.2	0.098545	683.2	0.0571149	683.2	0.0360929	683.2	0.0197223
683.4	0.163996	683.4	0.104374	683.4	0.0566058	683.4	0.0361045	683.4	0.0197214
683.6	0.164644	683.6	0.100971	683.6	0.0596634	683.6	0.0353359	683.6	0.0203744
683.8	0.165976	683.8	0.105386	683.8	0.0558129	683.8	0.0317881	683.8	0.0230798
684	0.163993	684	0.103027	684	0.0558946	684	0.0289316	684	0.0210513
684.2	0.161432	684.2	0.100855	684.2	0.0573827	684.2	0.0342811	684.2	0.0224673
684.4	0.166001	684.4	0.0984447	684.4	0.0535108	684.4	0.0317856	684.4	0.0243436
684.6	0.169935	684.6	0.10119	684.6	0.057338	684.6	0.0370149	684.6	0.0217133
684.8	0.162135	684.8	0.10171	684.8	0.0586602	684.8	0.0377692	684.8	0.0245359
685	0.168037	685	0.101553	685	0.0572021	685	0.0343277	685	0.0260646
685.2	0.1654	685.2	0.103382	685.2	0.0562271	685.2	0.0314026	685.2	0.0207908
685.4	0.169392	685.4	0.1041	685.4	0.0604104	685.4	0.0335109	685.4	0.0222236
685.6	0.165866	685.6	0.103378	685.6	0.0568067	685.6	0.0342881	685.6	0.0226496
685.8	0.163892	685.8	0.104972	685.8	0.0567996	685.8	0.0388646	685.8	0.0202443
686	0.164296	686	0.101624	686	0.0590015	686	0.0392249	686	0.0229772
686.2	0.165179	686.2	0.101612	686.2	0.0632804	686.2	0.0323171	686.2	0.0242735
686.4	0.169391	686.4	0.10472	686.4	0.0572843	686.4	0.0365842	686.4	0.0255022
686.6	0.166614	686.6	0.0997221	686.6	0.0561218	686.6	0.0338027	686.6	0.0233434
686.8	0.167358	686.8	0.103554	686.8	0.0571467	686.8	0.0352478	686.8	0.0222678
687	0.169086	687	0.107546	687	0.0616612	687	0.0359271	687	0.0250587
687.2	0.16668	687.2	0.103994	687.2	0.0567411	687.2	0.0356414	687.2	0.0219909
687.4	0.170576	687.4	0.107966	687.4	0.0620461	687.4	0.036836	687.4	0.0235978
687.6	0.170076	687.6	0.10623	687.6	0.0591132	687.6	0.0387962	687.6	0.0228774
687.8	0.167379	687.8	0.103088	687.8	0.0607593	687.8	0.0383191	687.8	0.0223705
688	0.17211	688	0.105174	688	0.0632279	688	0.0357107	688	0.0198359
688.2	0.173692	688.2	0.103485	688.2	0.0643985	688.2	0.0361541	688.2	0.0256367
688.4	0.167632	688.4	0.102367	688.4	0.0572617	688.4	0.0346214	688.4	0.0276784
688.6	0.165803	688.6	0.106726	688.6	0.0635204	688.6	0.0342718	688.6	0.0225066
688.8	0.17168	688.8	0.105325	688.8	0.0626227	688.8	0.0350137	688.8	0.0233757
689	0.169697	689	0.106106	689	0.0596602	689	0.0362886	689	0.0258499
689.2	0.174306	689.2	0.106984	689.2	0.0611766	689.2	0.0345681	689.2	0.0242505
689.4	0.173574	689.4	0.106939	689.4	0.064199	689.4	0.0337416	689.4	0.025084
689.6	0.173125	689.6	0.108154	689.6	0.0627193	689.6	0.0370525	689.6	0.0247955
689.8	0.174578	689.8	0.107744	689.8	0.0625748	689.8	0.0373579	689.8	0.0276728
690	0.173318	690	0.103813	690	0.0623934	690	0.0362358	690	0.0288454
690.2	0.172621	690.2	0.111148	690.2	0.061662	690.2	0.0361681	690.2	0.0225498
690.4	0.171703	690.4	0.10719	690.4	0.0635413	690.4	0.0352424	690.4	0.0227741
690.6	0.171259	690.6	0.110818	690.6	0.0593982	690.6	0.0331384	690.6	0.0263723
690.8	0.176973	690.8	0.106023	690.8	0.0628816	690.8	0.0371768	690.8	0.0262816
691	0.175171	691	0.106618	691	0.0574269	691	0.0356729	691	0.02271
691.2	0.176875	691.2	0.108142	691.2	0.061201	691.2	0.0386188	691.2	0.0299633
691.4	0.175827	691.4	0.10841	691.4	0.061054	691.4	0.0415871	691.4	0.0244447
691.6	0.1736	691.6	0.109591	691.6	0.0612156	691.6	0.0361764	691.6	0.0221293
691.8	0.173589	691.8	0.108833	691.8	0.0651986	691.8	0.038358	691.8	0.0246556
692	0.178923	692	0.108645	692	0.0629142	692	0.03808	692	0.025431
692.2	0.179415	692.2	0.109181	692.2	0.061894	692.2	0.0383201	692.2	0.0213668
692.4	0.179379	692.4	0.109365	692.4	0.0601124	692.4	0.0391587	692.4	0.0264155
692.6	0.173484	692.6	0.113266	692.6	0.0618805	692.6	0.0411398	692.6	0.0238264
692.8	0.177584	692.8	0.113341	692.8	0.0619774	692.8	0.0385069	692.8	0.0218005
693	0.178005	693	0.111686	693	0.0631126	693	0.0402358	693	0.0244109
693.2	0.180949	693.2	0.111033	693.2	0.0649636	693.2	0.0416513	693.2	0.0296071
693.4	0.176927	693.4	0.10956	693.4	0.0639955	693.4	0.0374634	693.4	0.0236234
693.6	0.17944	693.6	0.112077	693.6	0.065769	693.6	0.0369402	693.6	0.02705
693.8	0.177205	693.8	0.112574	693.8	0.0649812	693.8	0.0424752	693.8	0.0295385
694	0.177147	694	0.112766	694	0.0640044	694	0.0412698	694	0.0255807
694.2	0.179775	694.2	0.116112	694.2	0.0601592	694.2	0.038276	694.2	0.0239823
694.4	0.180943	694.4	0.110042	694.4	0.0668183	694.4	0.0372517	694.4	0.022682
694.6	0.180192	694.6	0.111734	694.6	0.063888	694.6	0.0386562	694.6	0.0279005
694.8	0.180862	694.8	0.111648	694.8	0.0613836	694.8	0.0379886	694.8	0.0219585
695	0.181244	695	0.114013	695	0.064211	695	0.0431517	695	0.0275666
695.2	0.17971	695.2	0.113816	695.2	0.0642768	695.2	0.0397732	695.2	0.0257741
695.4	0.183106	695.4	0.114129	695.4	0.0626082	695.4	0.0356566	695.4	0.0244729
695.6	0.182391	695.6	0.110915	695.6	0.0645248	695.6	0.041953	695.6	0.0280725
695.8	0.179526	695.8	0.114525	695.8	0.064543	695.8	0.0383096	695.8	0.0284303
696	0.182519	696	0.115988	696	0.0616467	696	0.0384903	696	0.0245796
696.2	0.182294	696.2	0.114129	696.2	0.0652451	696.2	0.0429035	696.2	0.0214617
696.4	0.183576	696.4	0.117806	696.4	0.0656955	696.4	0.0382028	696.4	0.0260177
696.6	0.185088	696.6	0.112614	696.6	0.0671462	696.6	0.0372238	696.6	0.0259878
696.8	0.184821	696.8	0.113448	696.8	0.0647331	696.8	0.0362168	696.8	0.0256229
697	0.184753	697	0.114598	697	0.0643177	697	0.0411854	697	0.0271954
697.2	0.185207	697.2	0.113182	697.2	0.0672856	697.2	0.0399	697.2	0.0261228
697.4	0.185412	697.4	0.118044	697.4	0.0660314	697.4	0.0342065	697.4	0.0207653
697.6	0.184392	697.6	0.116542	697.6	0.0629762	697.6	0.0389614	697.6	0.0245115
697.8	0.18524	697.8	0.117821	697.8	0.0621091	697.8	0.0379629	697.8	0.0246482
698	0.187498	698	0.115322	698	0.0660598	698	0.0369741	698	0.0269844
698.2	0.184712	698.2	0.114923	698.2	0.0687178	698.2	0.041659	698.2	0.0267094
698.4	0.186862	698.4	0.114478	698.4	0.0656487	698.4	0.0399224	698.4	0.0266643
698.6	0.189273	698.6	0.115722	698.6	0.0683086	698.6	0.038477	698.6	0.0283032
698.8	0.185856	698.8	0.116374	698.8	0.0647047	698.8	0.0354423	698.8	0.0267972
699	0.186455	699	0.11572	699	0.0663716	699	0.0360539	699	0.0253619
699.2	0.188811	699.2	0.116294	699.2	0.0651918	699.2	0.0404788	699.2	0.0247564
699.4	0.186435	699.4	0.119842	699.4	0.0673944	699.4	0.0378359	699.4	0.0300961
699.6	0.193898	699.6	0.118449	699.6	0.0638533	699.6	0.0396239	699.6	0.0280724
699.8	0.189434	699.8	0.119886	699.8	0.0621444	699.8	0.0406515	699.8	0.0217324
700	0.188172	700	0.118982	700	0.0652304	700	0.0384232	700	0.0238566
700.2	0.189742	700.2	0.116412	700.2	0.0679672	700.2	0.0391875	700.2	0.0260877
700.4	0.188181	700.4	0.116857	700.4	0.0671325	700.4	0.0405496	700.4	0.0254392
700.6	0.190239	700.6	0.117941	700.6	0.0667174	700.6	0.0375084	700.6	0.02872
700.8	0.190322	700.8	0.116143	700.8	0.0680333	700.8	0.0422863	700.8	0.0267654
701	0.193426	701	0.117718	701	0.0665515	701	0.0412342	701	0.0233179
701.2	0.192168	701.2	0.120383	701.2	0.0681839	701.2	0.0435327	701.2	0.0265487
701.4	0.192314	701.4	0.115832	701.4	0.0665683	701.4	0.0416352	701.4	0.024809
701.6	0.197897	701.6	0.115603	701.6	0.0630657	701.6	0.0414381	701.6	0.0270438
701.8	0.192607	701.8	0.120428	701.8	0.0659913	701.8	0.0462266	701.8	0.0284717
702	0.186109	702	0.121359	702	0.0685677	702	0.0414647	702	0.0310563
702.2	0.193739	702.2	0.118929	702.2	0.0677879	702.2	0.0393297	702.2	0.0248966
702.4	0.195779	702.4	0.121828	702.4	0.0646154	702.4	0.0401617	702.4	0.0255459
702.6	0.194322	702.6	0.116634	702.6	0.0668665	702.6	0.041834	702.6	0.0307512
702.8	0.191471	702.8	0.12214	702.8	0.0694929	702.8	0.0430968	702.8	0.0278863
703	0.19671	703	0.122615	703	0.0705627	703	0.0403672	703	0.0302458
703.2	0.194193	703.2	0.116415	703.2	0.066847	703.2	0.039713	703.2	0.0280044
703.4	0.190749	703.4	0.121301	703.4	0.0703538	703.4	0.0424454	703.4	0.0282955
703.6	0.199828	703.6	0.120585	703.6	0.0688723	703.6	0.0411357	703.6	0.0283482
703.8	0.198787	703.8	0.121435	703.8	0.0713658	703.8	0.0435202	703.8	0.0259206
704	0.195368	704	0.123967	704	0.0700897	704	0.0394999	704	0.0234044
704.2	0.197691	704.2	0.120996	704.2	0.06816	704.2	0.0392391	704.2	0.0298243
704.4	0.19805	704.4	0.126009	704.4	0.0711831	704.4	0.0428491	704.4	0.0287574
704.6	0.197538	704.6	0.120945	704.6	0.0673545	704.6	0.0405866	704.6	0.0237417
704.8	0.195926	704.8	0.119372	704.8	0.0710188	704.8	0.0392992	704.8	0.0284237
705	0.197971	705	0.12462	705	0.0722565	705	0.0418353	705	0.0258349
705.2	0.199213	705.2	0.119102	705.2	0.0671776	705.2	0.0410321	705.2	0.02876
705.4	0.197669	705.4	0.122985	705.4	0.0691555	705.4	0.040939	705.4	0.0296746
705.6	0.201692	705.6	0.122978	705.6	0.0707906	705.6	0.0443636	705.6	0.030679
705.8	0.200322	705.8	0.12432	705.8	0.0664934	705.8	0.0454898	705.8	0.0279366
706	0.199273	706	0.124371	706	0.0678929	706	0.0431512	706	0.0287646
706.2	0.201019	706.2	0.125714	706.2	0.0703153	706.2	0.0435182	706.2	0.024531
706.4	0.196515	706.4	0.121315	706.4	0.0733812	706.4	0.0408432	706.4	0.0304335
706.6	0.197091	706.6	0.121825	706.6	0.0721722	706.6	0.0415946	706.6	0.0261283
706.8	0.201122	706.8	0.122261	706.8	0.0684161	706.8	0.0430135	706.8	0.0281706
707	0.202699	707	0.120607	707	0.066915	707	0.0438152	707	0.0264547
707.2	0.20354	707.2	0.122352	707.2	0.073215	707.2	0.03969	707.2	0.025994
707.4	0.200622	707.4	0.123901	707.4	0.0693969	707.4	0.039451	707.4	0.0270395
707.6	0.200401	707.6	0.128172	707.6	0.0684121	707.6	0.0418721	707.6	0.0290992
707.8	0.200603	707.8	0.122645	707.8	0.0703902	707.8	0.0445056	707.8	0.0287593
708	0.201749	708	0.123579	708	0.0717355	708	0.0433383	708	0.0302973
708.2	0.204648	708.2	0.125743	708.2	0.0691769	708.2	0.0417698	708.2	0.0260673
708.4	0.203841	708.4	0.127021	708.4	0.0694856	708.4	0.0446027	708.4	0.0299409
708.6	0.202854	708.6	0.125124	708.6	0.0709309	708.6	0.0431432	708.6	0.0254357
708.8	0.202412	708.8	0.12441	708.8	0.075059	708.8	0.041604	708.8	0.0293216
709	0.202261	709	0.125537	709	0.0736974	709	0.0426871	709	0.031398
709.2	0.204988	709.2	0.125373	709.2	0.0733904	709.2	0.0378665	709.2	0.0257076
709.4	0.20078	709.4	0.126194	709.4	0.0758151	709.4	0.0452707	709.4	0.0291268
709.6	0.205076	709.6	0.129714	709.6	0.0738736	709.6	0.0457549	709.6	0.0324429
709.8	0.206579	709.8	0.127299	709.8	0.0686504	709.8	0.04205	709.8	0.0273327
710	0.20535	710	0.122956	710	0.0712216	710	0.0437632	710	0.0297307
710.2	0.207359	710.2	0.12467	710.2	0.0754743	710.2	0.0410094	710.2	0.0300617
710.4	0.205378	710.4	0.128556	710.4	0.0721894	710.4	0.0459712	710.4	0.0257918
710.6	0.206867	710.6	0.128381	710.6	0.0701548	710.6	0.0423194	710.6	0.0294749
710.8	0.206734	710.8	0.132461	710.8	0.0773401	710.8	0.0503382	710.8	0.0278285
711	0.204625	711	0.126185	711	0.0740073	711	0.0435516	711	0.0304502
711.2	0.211335	711.2	0.126649	711.2	0.075306	711.2	0.0436372	711.2	0.0292205
711.4	0.204677	711.4	0.127701	711.4	0.0764373	711.4	0.0438483	711.4	0.0314385
711.6	0.204048	711.6	0.133075	711.6	0.072444	711.6	0.0413723	711.6	0.0287634
711.8	0.207901	711.8	0.131674	711.8	0.0730739	711.8	0.0460595	711.8	0.0302852
712	0.207172	712	0.127605	712	0.0718153	712	0.0415093	712	0.0280947
712.2	0.207757	712.2	0.128247	712.2	0.0744585	712.2	0.0417647	712.2	0.0290104
712.4	0.203728	712.4	0.128724	712.4	0.076153	712.4	0.0466321	712.4	0.0283169
712.6	0.209228	712.6	0.128502	712.6	0.0713654	712.6	0.0500339	712.6	0.0305869
712.8	0.208294	712.8	0.134855	712.8	0.0757696	712.8	0.0459293	712.8	0.0332101
713	0.208708	713	0.133009	713	0.0732966	713	0.0457018	713	0.0241005
713.2	0.209418	713.2	0.129631	713.2	0.0781966	713.2	0.0447746	713.2	0.0281066
713.4	0.208993	713.4	0.130467	713.4	0.0753272	713.4	0.0454824	713.4	0.0303102
713.6	0.210997	713.6	0.131758	713.6	0.0759032	713.6	0.0422325	713.6	0.0247568
713.8	0.20928	713.8	0.131515	713.8	0.0750143	713.8	0.0475194	713.8	0.0309632
714	0.212786	714	0.130475	714	0.0749176	714	0.0436226	714	0.0298267
714.2	0.212116	714.2	0.134587	714.2	0.0769299	714.2	0.0443957	714.2	0.026226
714.4	0.211713	714.4	0.127816	714.4	0.075794	714.4	0.0440888	714.4	0.0305595
714.6	0.211525	714.6	0.130209	714.6	0.0732391	714.6	0.0461846	714.6	0.0296377
714.8	0.2137	714.8	0.132227	714.8	0.0743778	714.8	0.0448126	714.8	0.0308636
715	0.213816	715	0.129798	715	0.0730649	715	0.0459723	715	0.0311782
715.2	0.21335	715.2	0.131393	715.2	0.0742688	715.2	0.0469932	715.2	0.0309146
715.4	0.214758	715.4	0.139495	715.4	0.0755996	715.4	0.0461005	715.4	0.0339569
715.6	0.209605	715.6	0.130881	715.6	0.0773864	715.6	0.0469221	715.6	0.0354084
715.8	0.210871	715.8	0.134129	715.8	0.0724874	715.8	0.044654	715.8	0.0307061
716	0.214102	716	0.134631	716	0.0767757	716	0.044921	716	0.0335632
716.2	0.218108	716.2	0.134732	716.2	0.0792287	716.2	0.0508176	716.2	0.0287755
716.4	0.215298	716.4	0.136005	716.4	0.0749273	716.4	0.0494349	716.4	0.0310162
716.6	0.212636	716.6	0.133318	716.6	0.0728604	716.6	0.047992	716.6	0.0318369
716.8	0.213653	716.8	0.132821	716.8	0.0717408	716.8	0.0456934	716.8	0.0287528
717	0.218207	717	0.131641	717	0.0765638	717	0.0434728	717	0.0279286
717.2	0.213649	717.2	0.136827	717.2	0.0796133	717.2	0.0445211	717.2	0.0300286
717.4	0.214968	717.4	0.136074	717.4	0.0762619	717.4	0.0494776	717.4	0.0311039
717.6	0.218977	717.6	0.135079	717.6	0.0795804	717.6	0.0462293	717.6	0.0290618
717.8	0.214454	717.8	0.132968	717.8	0.077344	717.8	0.0500595	717.8	0.0320806
718	0.221917	718	0.136274	718	0.0785873	718	0.042325	718	0.0312338
718.2	0.2139	718.2	0.137011	718.2	0.0778051	718.2	0.045294	718.2	0.0282129
718.4	0.216967	718.4	0.133865	718.4	0.0773153	718.4	0.0488011	718.4	0.0295155
718.6	0.218923	718.6	0.137009	718.6	0.0793716	718.6	0.0470063	718.6	0.0298909
718.8	0.217977	718.8	0.133516	718.8	0.0781958	718.8	0.0503174	718.8	0.031909
719	0.220661	719	0.134949	719	0.0792346	719	0.0448357	719	0.0317921
719.2	0.22278	719.2	0.135311	719.2	0.0781866	719.2	0.0481938	719.2	0.0272995
719.4	0.220208	719.4	0.138685	719.4	0.0804578	719.4	0.0507069	719.4	0.0320184
719.6	0.222478	719.6	0.137417	719.6	0.0775969	719.6	0.0465861	719.6	0.0297359
719.8	0.221787	719.8	0.138823	719.8	0.0793211	719.8	0.0482671	719.8	0.0330254
720	0.218089	720	0.135797	720	0.0775701	720	0.0487288	720	0.0294476
720.2	0.220334	720.2	0.135748	720.2	0.0741915	720.2	0.04535	720.2	0.0271356
720.4	0.218373	720.4	0.136093	720.4	0.0811599	720.4	0.0470777	720.4	0.0329045
720.6	0.222265	720.6	0.135679	720.6	0.0771829	720.6	0.0493802	720.6	0.0348389
720.8	0.219814	720.8	0.137449	720.8	0.0799342	720.8	0.0498205	720.8	0.0314297
721	0.223973	721	0.140472	721	0.0805652	721	0.0476867	721	0.0304358
721.2	0.219757	721.2	0.140214	721.2	0.0757797	721.2	0.0474562	721.2	0.0308549
721.4	0.221349	721.4	0.137555	721.4	0.0738051	721.4	0.0458766	721.4	0.0302615
721.6	0.219279	721.6	0.138979	721.6	0.0777754	721.6	0.047924	721.6	0.0307386
721.8	0.219563	721.8	0.138149	721.8	0.0783154	721.8	0.0452417	721.8	0.0315955
722	0.221688	722	0.138979	722	0.0781749	722	0.0468107	722	0.0315159
722.2	0.221589	722.2	0.14167	722.2	0.0797339	722.2	0.0444832	722.2	0.0323429
722.4	0.227876	722.4	0.135555	722.4	0.0794035	722.4	0.0434486	722.4	0.0297323
722.6	0.224641	722.6	0.139255	722.6	0.0793876	722.6	0.0463124	722.6	0.0324255
722.8	0.224915	722.8	0.138755	722.8	0.0788793	722.8	0.048015	722.8	0.0347486
723	0.222382	723	0.138626	723	0.0811153	723	0.0465451	723	0.0356816
723.2	0.224844	723.2	0.141132	723.2	0.081644	723.2	0.0477872	723.2	0.0290513
723.4	0.225105	723.4	0.143805	723.4	0.0820326	723.4	0.0505006	723.4	0.0358477
723.6	0.227025	723.6	0.140786	723.6	0.0821252	723.6	0.0487036	723.6	0.029621
723.8	0.222223	723.8	0.14106	723.8	0.078921	723.8	0.050557	723.8	0.0305175
724	0.223502	724	0.140852	724	0.0850759	724	0.0522438	724	0.0309338
724.2	0.227557	724.2	0.142257	724.2	0.0802607	724.2	0.0500566	724.2	0.0321988
724.4	0.224583	724.4	0.140456	724.4	0.0797542	724.4	0.0482188	724.4	0.0350011
724.6	0.22616	724.6	0.137409	724.6	0.0778338	724.6	0.0491921	724.6	0.0300356
724.8	0.226796	724.8	0.140673	724.8	0.0809707	724.8	0.0525777	724.8	0.0333511
725	0.227314	725	0.141032	725	0.0804648	725	0.0492855	725	0.0313757
725.2	0.226943	725.2	0.142114	725.2	0.0822996	725.2	0.0456234	725.2	0.0331735
725.4	0.228585	725.4	0.142172	725.4	0.0748626	725.4	0.0512934	725.4	0.0342127
725.6	0.229719	725.6	0.142616	725.6	0.0815676	725.6	0.0482641	725.6	0.0315708
725.8	0.230061	725.8	0.143012	725.8	0.0806336	725.8	0.0525054	725.8	0.0308486
726	0.228465	726	0.145826	726	0.0817047	726	0.0527928	726	0.0333553
726.2	0.228475	726.2	0.14531	726.2	0.0750368	726.2	0.0494214	726.2	0.0332088
726.4	0.23126	726.4	0.142847	726.4	0.0807957	726.4	0.0487884	726.4	0.0334654
726.6	0.231616	726.6	0.140695	726.6	0.0766848	726.6	0.0496494	726.6	0.0327662
726.8	0.229944	726.8	0.145134	726.8	0.0797891	726.8	0.0504463	726.8	0.0313949
727	0.231477	727	0.145405	727	0.0846489	727	0.0522615	727	0.0323002
727.2	0.235064	727.2	0.144369	727.2	0.0811505	727.2	0.0494448	727.2	0.0309559
727.4	0.231779	727.4	0.144098	727.4	0.082121	727.4	0.0505643	727.4	0.0312943
727.6	0.229951	727.6	0.144591	727.6	0.0824299	727.6	0.052515	727.6	0.0308377
727.8	0.232841	727.8	0.145571	727.8	0.0858329	727.8	0.0494085	727.8	0.0296243
728	0.234329	728	0.1471	728	0.0828791	728	0.0525506	728	0.0336215
728.2	0.233178	728.2	0.143779	728.2	0.0834269	728.2	0.0513654	728.2	0.0365033
728.4	0.237258	728.4	0.14674	728.4	0.0813803	728.4	0.0531214	728.4	0.0325268
728.6	0.23203	728.6	0.147711	728.6	0.0817443	728.6	0.0498738	728.6	0.0302195
728.8	0.238509	728.8	0.147133	728.8	0.0817568	728.8	0.0542636	728.8	0.0337921
729	0.233431	729	0.146615	729	0.0863999	729	0.0528278	729	0.0330131
729.2	0.232096	729.2	0.145196	729.2	0.0807804	729.2	0.0537412	729.2	0.0307115
729.4	0.234298	729.4	0.149157	729.4	0.0840334	729.4	0.0492397	729.4	0.031272
729.6	0.234799	729.6	0.142717	729.6	0.0830938	729.6	0.0551064	729.6	0.0329195
729.8	0.232471	729.8	0.146755	729.8	0.0854201	729.8	0.0530308	729.8	0.0367382
730	0.233976	730	0.147497	730	0.0831145	730	0.0482406	730	0.0325841
730.2	0.234338	730.2	0.145618	730.2	0.0817857	730.2	0.050354	730.2	0.0308807
730.4	0.233961	730.4	0.148892	730.4	0.0818004	730.4	0.051288	730.4	0.0312796
730.6	0.235847	730.6	0.147147	730.6	0.083727	730.6	0.0518432	730.6	0.032557
730.8	0.236406	730.8	0.147334	730.8	0.0796714	730.8	0.0485217	730.8	0.035591
731	0.238591	731	0.147866	731	0.0840326	731	0.0506863	731	0.0353899
731.2	0.237229	731.2	0.14707	731.2	0.0845159	731.2	0.0473	731.2	0.0306618
731.4	0.233242	731.4	0.148332	731.4	0.0832373	731.4	0.0487707	731.4	0.0336405
731.6	0.238534	731.6	0.148605	731.6	0.0845247	731.6	0.0539772	731.6	0.0356792
731.8	0.235332	731.8	0.146947	731.8	0.0857768	731.8	0.0527608	731.8	0.0340651
732	0.235806	732	0.152935	732	0.0838389	732	0.0482158	732	0.0363435
732.2	0.240548	732.2	0.149015	732.2	0.0837246	732.2	0.0507608	732.2	0.0388929
732.4	0.235325	732.4	0.152577	732.4	0.0872865	732.4	0.0494822	732.4	0.0349811
732.6	0.23852	732.6	0.149928	732.6	0.084654	732.6	0.0478753	732.6	0.0360741
732.8	0.239163	732.8	0.148126	732.8	0.0820387	732.8	0.0508942	732.8	0.0360716
733	0.241028	733	0.150504	733	0.0853326	733	0.0522181	733	0.03159
733.2	0.240932	733.2	0.153142	733.2	0.0862456	733.2	0.0545223	733.2	0.0361079
733.4	0.240935	733.4	0.148917	733.4	0.0831336	733.4	0.0538155	733.4	0.0325957
733.6	0.245678	733.6	0.155019	733.6	0.0839291	733.6	0.0517585	733.6	0.034747
733.8	0.24224	733.8	0.14922	733.8	0.0817024	733.8	0.050997	733.8	0.0364352
734	0.245827	734	0.146163	734	0.0841242	734	0.0535591	734	0.0329154
734.2	0.243455	734.2	0.150564	734.2	0.0856198	734.2	0.0516401	734.2	0.034743
734.4	0.242683	734.4	0.153883	734.4	0.0851575	734.4	0.0513315	734.4	0.0319965
734.6	0.241052	734.6	0.148822	734.6	0.0862923	734.6	0.0535928	734.6	0.0335416
734.8	0.237766	734.8	0.148512	734.8	0.0878087	734.8	0.0533727	734.8	0.0358386
735	0.239961	735	0.149874	735	0.0846693	735	0.0491597	735	0.0329765
735.2	0.242323	735.2	0.152163	735.2	0.0863371	735.2	0.0526548	735.2	0.0315075
735.4	0.24416	735.4	0.150655	735.4	0.0875448	735.4	0.0536451	735.4	0.0311104
735.6	0.248822	735.6	0.147019	735.6	0.0854712	735.6	0.0541211	735.6	0.033542
735.8	0.242963	735.8	0.153658	735.8	0.0864482	735.8	0.0498666	735.8	0.034601
736	0.243655	736	0.148973	736	0.0862913	736	0.055322	736	0.0349915
736.2	0.241501	736.2	0.153985	736.2	0.084535	736.2	0.0517115	736.2	0.0335147
736.4	0.245179	736.4	0.15398	736.4	0.0832479	736.4	0.0498552	736.4	0.0341334
736.6	0.24356	736.6	0.154573	736.6	0.0856135	736.6	0.0529698	736.6	0.0351071
736.8	0.242551	736.8	0.156261	736.8	0.0894119	736.8	0.0535497	736.8	0.0353929
737	0.2421	737	0.153724	737	0.0871198	737	0.0529053	737	0.0373625
737.2	0.244089	737.2	0.150293	737.2	0.0865617	737.2	0.0536317	737.2	0.0378579
737.4	0.247566	737.4	0.158014	737.4	0.0866785	737.4	0.0490753	737.4	0.0345818
737.6	0.247125	737.6	0.15177	737.6	0.0876065	737.6	0.0537546	737.6	0.0352083
737.8	0.250329	737.8	0.154875	737.8	0.0857838	737.8	0.050409	737.8	0.0359044
738	0.24529	738	0.153516	738	0.0872858	738	0.0546602	738	0.0364656
738.2	0.245629	738.2	0.157344	738.2	0.0847515	738.2	0.0538555	738.2	0.0363027
738.4	0.247408	738.4	0.157869	738.4	0.0881261	738.4	0.0551723	738.4	0.0354947
738.6	0.247146	738.6	0.156223	738.6	0.089763	738.6	0.0534203	738.6	0.0369719
738.8	0.248352	738.8	0.157526	738.8	0.0871037	738.8	0.0535777	738.8	0.0341558
739	0.248665	739	0.155202	739	0.0852855	739	0.0535503	739	0.0366707
739.2	0.253255	739.2	0.158272	739.2	0.08586	739.2	0.0513164	739.2	0.0346098
739.4	0.249757	739.4	0.153967	739.4	0.0899447	739.4	0.0533393	739.4	0.0346734
739.6	0.250571	739.6	0.152801	739.6	0.0870972	739.6	0.0514826	739.6	0.0336007
739.8	0.246825	739.8	0.155552	739.8	0.0897618	739.8	0.0480859	739.8	0.0356104
740	0.247342	740	0.153037	740	0.0946856	740	0.0559222	740	0.0341855
740.2	0.250376	740.2	0.156856	740.2	0.0870703	740.2	0.0523999	740.2	0.030998
740.4	0.249759	740.4	0.153357	740.4	0.0888237	740.4	0.0517853	740.4	0.0352141
740.6	0.246185	740.6	0.155555	740.6	0.0844278	740.6	0.0505085	740.6	0.0393104
740.8	0.246315	740.8	0.156194	740.8	0.0874991	740.8	0.0534491	740.8	0.0352233
741	0.249074	741	0.157505	741	0.0872801	741	0.0538711	741	0.0326931
741.2	0.249395	741.2	0.156149	741.2	0.0886496	741.2	0.0546418	741.2	0.0362597
741.4	0.256315	741.4	0.159142	741.4	0.0879972	741.4	0.0522955	741.4	0.0362187
741.6	0.247267	741.6	0.162885	741.6	0.0892737	741.6	0.0546507	741.6	0.0364912
741.8	0.25212	741.8	0.154859	741.8	0.0863124	741.8	0.0551254	741.8	0.0350172
742	0.251873	742	0.158523	742	0.0921922	742	0.0537369	742	0.0309015
742.2	0.255057	742.2	0.159468	742.2	0.0870947	742.2	0.0528419	742.2	0.0347756
742.4	0.2491	742.4	0.157377	742.4	0.0902402	742.4	0.0534273	742.4	0.0359703
742.6	0.252684	742.6	0.158276	742.6	0.0898634	742.6	0.0554103	742.6	0.0356318
742.8	0.254138	742.8	0.157615	742.8	0.0874013	742.8	0.0510834	742.8	0.0335456
743	0.254187	743	0.158314	743	0.0881887	743	0.0541729	743	0.0361439
743.2	0.251634	743.2	0.160624	743.2	0.0883003	743.2	0.0563129	743.2	0.0344877
743.4	0.252318	743.4	0.159562	743.4	0.0891499	743.4	0.054605	743.4	0.0371903
743.6	0.255339	743.6	0.155971	743.6	0.0858609	743.6	0.0513351	743.6	0.0336512
743.8	0.255187	743.8	0.161105	743.8	0.0900101	743.8	0.0557815	743.8	0.0407826
744	0.253233	744	0.157148	744	0.0899461	744	0.0553857	744	0.0342462
744.2	0.252269	744.2	0.15814	744.2	0.0909222	744.2	0.0575116	744.2	0.0334694
744.4	0.253417	744.4	0.159526	744.4	0.093321	744.4	0.0563484	744.4	0.0356894
744.6	0.255679	744.6	0.15966	744.6	0.0938637	744.6	0.0539425	744.6	0.0373017
744.8	0.256434	744.8	0.160052	744.8	0.0873669	744.8	0.0547006	744.8	0.0378607
745	0.255496	745	0.159139	745	0.092254	745	0.0569165	745	0.0358178
745.2	0.253723	745.2	0.162763	745.2	0.0894365	745.2	0.0578924	745.2	0.0346554
745.4	0.255421	745.4	0.162433	745.4	0.0889137	745.4	0.0560353	745.4	0.035403
745.6	0.258186	745.6	0.161351	745.6	0.0902138	745.6	0.0533355	745.6	0.03719
745.8	0.256605	745.8	0.161007	745.8	0.0868161	745.8	0.0540003	745.8	0.035383
746	0.254759	746	0.165595	746	0.0902015	746	0.0550289	746	0.0416546
746.2	0.257412	746.2	0.160285	746.2	0.0934981	746.2	0.0539556	746.2	0.0327601
746.4	0.257807	746.4	0.157146	746.4	0.093925	746.4	0.0543493	746.4	0.0353982
746.6	0.257311	746.6	0.162595	746.6	0.0895333	746.6	0.0533148	746.6	0.0388955
746.8	0.261738	746.8	0.16545	746.8	0.0933564	746.8	0.053636	746.8	0.0367562
747	0.258857	747	0.161105	747	0.0935357	747	0.0527903	747	0.0380642
747.2	0.260071	747.2	0.161512	747.2	0.0966121	747.2	0.0575408	747.2	0.0372167
747.4	0.258618	747.4	0.159698	747.4	0.0921901	747.4	0.0544683	747.4	0.0384134
747.6	0.259309	747.6	0.161383	747.6	0.0933482	747.6	0.055306	747.6	0.0396184
747.8	0.258972	747.8	0.161539	747.8	0.0954416	747.8	0.0538375	747.8	0.0379068
748	0.255587	748	0.165228	748	0.0916953	748	0.0531915	748	0.0364087
748.2	0.258461	748.2	0.166009	748.2	0.0907853	748.2	0.0586744	748.2	0.0401796
748.4	0.262094	748.4	0.16321	748.4	0.0895594	748.4	0.0561486	748.4	0.0379929
748.6	0.260955	748.6	0.167017	748.6	0.0930585	748.6	0.0546903	748.6	0.0384338
748.8	0.25973	748.8	0.164383	748.8	0.0936862	748.8	0.0541127	748.8	0.0343885
749	0.264417	749	0.165012	749	0.0932384	749	0.0598358	749	0.0378262
749.2	0.262649	749.2	0.163374	749.2	0.0918441	749.2	0.058966	749.2	0.0384862
749.4	0.2591	749.4	0.164295	749.4	0.0915417	749.4	0.0564387	749.4	0.0366341
749.6	0.262117	749.6	0.166093	749.6	0.0931669	749.6	0.0554402	749.6	0.0410026
749.8	0.267312	749.8	0.166686	749.8	0.0950608	749.8	0.0579827	749.8	0.0366735
750	0.262601	750	0.163283	750	0.0888015	750	0.0548394	750	0.0378986
750.2	0.264057	750.2	0.165691	750.2	0.09317	750.2	0.0577542	750.2	0.0378274
750.4	0.262279	750.4	0.164669	750.4	0.0954919	750.4	0.0549832	750.4	0.0379262
750.6	0.265017	750.6	0.166648	750.6	0.0944307	750.6	0.0559928	750.6	0.0371679
750.8	0.266214	750.8	0.166775	750.8	0.0946543	750.8	0.0546465	750.8	0.041245
751	0.263704	751	0.161876	751	0.0931511	751	0.0557613	751	0.0361885
751.2	0.26465	751.2	0.166663	751.2	0.0936195	751.2	0.0561801	751.2	0.0339448
751.4	0.266035	751.4	0.163323	751.4	0.0948562	751.4	0.0600646	751.4	0.0363446
751.6	0.266907	751.6	0.164759	751.6	0.0929304	751.6	0.0565924	751.6	0.0391129
751.8	0.267261	751.8	0.16635	751.8	0.0968685	751.8	0.0587054	751.8	0.0376331
752	0.265107	752	0.167216	752	0.0941951	752	0.0591139	752	0.0381346
752.2	0.269888	752.2	0.163413	752.2	0.0970358	752.2	0.0590405	752.2	0.0367375
752.4	0.269447	752.4	0.164984	752.4	0.0933401	752.4	0.056319	752.4	0.0369922
752.6	0.2652	752.6	0.169387	752.6	0.0946555	752.6	0.0552367	752.6	0.038683
752.8	0.268089	752.8	0.162789	752.8	0.0945316	752.8	0.0570269	752.8	0.0372604
753	0.267705	753	0.164232	753	0.0924081	753	0.0578497	753	0.0368913
753.2	0.265699	753.2	0.165079	753.2	0.0922545	753.2	0.0610255	753.2	0.0388832
753.4	0.271024	753.4	0.164371	753.4	0.0943869	753.4	0.0585921	753.4	0.0361631
753.6	0.270208	753.6	0.169077	753.6	0.0925541	753.6	0.0536111	753.6	0.03795
753.8	0.270861	753.8	0.16873	753.8	0.0946473	753.8	0.0576689	753.8	0.0425137
754	0.272642	754	0.168397	754	0.0925194	754	0.0578233	754	0.0364578
754.2	0.268411	754.2	0.168209	754.2	0.0966728	754.2	0.0563848	754.2	0.0418767
754.4	0.270818	754.4	0.166784	754.4	0.0954788	754.4	0.0563871	754.4	0.0380415
754.6	0.269049	754.6	0.171217	754.6	0.0955313	754.6	0.0592014	754.6	0.0382623
754.8	0.271341	754.8	0.16968	754.8	0.0940021	754.8	0.057036	754.8	0.0400858
755	0.272506	755	0.16887	755	0.0965016	755	0.0602683	755	0.038115
755.2	0.271798	755.2	0.169845	755.2	0.092678	755.2	0.058106	755.2	0.0347309
755.4	0.270763	755.4	0.170584	755.4	0.0966957	755.4	0.0536439	755.4	0.0368377
755.6	0.275572	755.6	0.170768	755.6	0.0976857	755.6	0.0583796	755.6	0.0372641
755.8	0.268773	755.8	0.170874	755.8	0.0935709	755.8	0.0615654	755.8	0.0388439
756	0.268578	756	0.170576	756	0.0915946	756	0.0608164	756	0.0358774
756.2	0.273262	756.2	0.171801	756.2	0.0971091	756.2	0.061706	756.2	0.0377756
756.4	0.270492	756.4	0.172591	756.4	0.0995395	756.4	0.0623823	756.4	0.0406973
756.6	0.272628	756.6	0.170491	756.6	0.0958331	756.6	0.0616861	756.6	0.040598
756.8	0.270184	756.8	0.172865	756.8	0.0991417	756.8	0.0590253	756.8	0.0381464
757	0.276118	757	0.172968	757	0.097289	757	0.0587803	757	0.0357088
757.2	0.27363	757.2	0.171523	757.2	0.0938025	757.2	0.0541377	757.2	0.0387494
757.4	0.27373	757.4	0.171006	757.4	0.0979844	757.4	0.0598733	757.4	0.0379045
757.6	0.275485	757.6	0.174963	757.6	0.0951265	757.6	0.059568	757.6	0.0384495
757.8	0.274519	757.8	0.174286	757.8	0.0990475	757.8	0.0628279	757.8	0.0382834
758	0.276842	758	0.174434	758	0.098134	758	0.0576275	758	0.0348716
758.2	0.276795	758.2	0.170315	758.2	0.0961484	758.2	0.0584912	758.2	0.0410392
758.4	0.272198	758.4	0.175379	758.4	0.0977486	758.4	0.0614486	758.4	0.0395503
758.6	0.273553	758.6	0.166905	758.6	0.0956032	758.6	0.056137	758.6	0.0377702
758.8	0.274985	758.8	0.172856	758.8	0.0996293	758.8	0.0614996	758.8	0.0396047
759	0.278962	759	0.174592	759	0.099179	759	0.0599131	759	0.0374486
759.2	0.272365	759.2	0.173104	759.2	0.0971673	759.2	0.0588084	759.2	0.0410128
759.4	0.277528	759.4	0.174363	759.4	0.100562	759.4	0.0606405	759.4	0.0381548
759.6	0.278828	759.6	0.173352	759.6	0.100877	759.6	0.059987	759.6	0.0385467
759.8	0.27639	759.8	0.174096	759.8	0.0985229	759.8	0.0598785	759.8	0.0400629
760	0.279183	760	0.174689	760	0.0952563	760	0.0596075	760	0.0405073
760.2	0.277458	760.2	0.177118	760.2	0.0953691	760.2	0.0600779	760.2	0.0371632
760.4	0.281396	760.4	0.174082	760.4	0.0948941	760.4	0.0575584	760.4	0.0426009
760.6	0.279026	760.6	0.175336	760.6	0.0987211	760.6	0.0615283	760.6	0.0405463
760.8	0.274404	760.8	0.172281	760.8	0.102076	760.8	0.0583789	760.8	0.0404402
761	0.281614	761	0.17864	761	0.0989232	761	0.0593464	761	0.0394308
761.2	0.278915	761.2	0.173563	761.2	0.10121	761.2	0.0606938	761.2	0.0383975
761.4	0.280146	761.4	0.178263	761.4	0.0998035	761.4	0.0603486	761.4	0.0383136
761.6	0.280683	761.6	0.170722	761.6	0.100712	761.6	0.0638253	761.6	0.0413569
761.8	0.274366	761.8	0.172834	761.8	0.0997917	761.8	0.0607813	761.8	0.0379582
762	0.282769	762	0.176327	762	0.0971055	762	0.0638037	762	0.0411453
762.2	0.280169	762.2	0.177469	762.2	0.0979852	762.2	0.0581489	762.2	0.0405359
762.4	0.282411	762.4	0.175104	762.4	0.101669	762.4	0.061829	762.4	0.0402619
762.6	0.28159	762.6	0.172494	762.6	0.0968179	762.6	0.062451	762.6	0.0392434
762.8	0.282528	762.8	0.174746	762.8	0.0952376	762.8	0.0603081	762.8	0.040449
763	0.283062	763	0.17745	763	0.0956856	763	0.0634963	763	0.0392323
763.2	0.280896	763.2	0.178508	763.2	0.0998107	763.2	0.0613378	763.2	0.0371719
763.4	0.281214	763.4	0.179496	763.4	0.0980688	763.4	0.0622958	763.4	0.0439916
763.6	0.28444	763.6	0.175085	763.6	0.0988897	763.6	0.0618255	763.6	0.0370663
763.8	0.286999	763.8	0.176862	763.8	0.101132	763.8	0.05947	763.8	0.0405995
764	0.282359	764	0.177532	764	0.0981121	764	0.0599328	764	0.0394221
764.2	0.280323	764.2	0.176823	764.2	0.0958368	764.2	0.0635238	764.2	0.0389672
764.4	0.282906	764.4	0.174422	764.4	0.0986368	764.4	0.0619099	764.4	0.0397015
764.6	0.28175	764.6	0.176197	764.6	0.0980365	764.6	0.060354	764.6	0.0435335
764.8	0.285533	764.8	0.178043	764.8	0.0993636	764.8	0.0620179	764.8	0.03965
765	0.286942	765	0.178486	765	0.101254	765	0.0631669	765	0.0428524
765.2	0.282047	765.2	0.175612	765.2	0.0994043	765.2	0.0608114	765.2	0.0410397
765.4	0.284506	765.4	0.182565	765.4	0.10337	765.4	0.0610223	765.4	0.0425389
765.6	0.281557	765.6	0.178305	765.6	0.101775	765.6	0.0616323	765.6	0.0386969
765.8	0.283815	765.8	0.178084	765.8	0.0994086	765.8	0.0609871	765.8	0.0404054
766	0.283627	766	0.177621	766	0.0976028	766	0.0585424	766	0.0410283
766.2	0.284634	766.2	0.179043	766.2	0.100215	766.2	0.0656641	766.2	0.0387131
766.4	0.286816	766.4	0.18135	766.4	0.102233	766.4	0.0607119	766.4	0.0395511
766.6	0.286705	766.6	0.179879	766.6	0.101079	766.6	0.0589346	766.6	0.0444937
766.8	0.283572	766.8	0.179224	766.8	0.10241	766.8	0.0609925	766.8	0.0385111
767	0.285754	767	0.183008	767	0.102852	767	0.0624939	767	0.0400349
767.2	0.29084	767.2	0.17628	767.2	0.101316	767.2	0.0593627	767.2	0.0387724
767.4	0.289234	767.4	0.180129	767.4	0.102714	767.4	0.0614953	767.4	0.0411332
767.6	0.285862	767.6	0.179487	767.6	0.0994833	767.6	0.0591023	767.6	0.0410728
767.8	0.287418	767.8	0.176035	767.8	0.102093	767.8	0.0615498	767.8	0.0411866
768	0.289694	768	0.180593	768	0.0965581	768	0.0644122	768	0.0423851
768.2	0.287902	768.2	0.181171	768.2	0.102791	768.2	0.0633799	768.2	0.0386454
768.4	0.288407	768.4	0.178206	768.4	0.10536	768.4	0.060526	768.4	0.0409006
768.6	0.290592	768.6	0.181605	768.6	0.101987	768.6	0.0654167	768.6	0.0359376
768.8	0.290037	768.8	0.179242	768.8	0.102871	768.8	0.065266	768.8	0.0386174
769	0.289299	769	0.177827	769	0.0985878	769	0.0629163	769	0.0421753
769.2	0.287294	769.2	0.179584	769.2	0.100467	769.2	0.0637774	769.2	0.0415872
769.4	0.290754	769.4	0.177624	769.4	0.101387	769.4	0.0628683	769.4	0.0414381
769.6	0.290699	769.6	0.180844	769.6	0.0981559	769.6	0.0631238	769.6	0.0411299
769.8	0.288303	769.8	0.180161	769.8	0.101841	769.8	0.0662989	769.8	0.0416354
770	0.286009	770	0.181948	770	0.104176	770	0.0573959	770	0.041419
770.2	0.28834	770.2	0.184749	770.2	0.100822	770.2	0.0641997	770.2	0.0403552
770.4	0.289473	770.4	0.182705	770.4	0.105622	770.4	0.0611584	770.4	0.0413498
770.6	0.285864	770.6	0.183204	770.6	0.10507	770.6	0.0653838	770.6	0.0420704
770.8	0.289641	770.8	0.185234	770.8	0.101333	770.8	0.0632097	770.8	0.0428207
771	0.289603	771	0.183015	771	0.103408	771	0.0668682	771	0.043429
771.2	0.29127	771.2	0.181013	771.2	0.103783	771.2	0.0603438	771.2	0.0408983
771.4	0.293512	771.4	0.180473	771.4	0.104656	771.4	0.0645678	771.4	0.0416633
771.6	0.291492	771.6	0.183007	771.6	0.106266	771.6	0.0641264	771.6	0.0424298
771.8	0.293149	771.8	0.183243	771.8	0.103252	771.8	0.0631906	771.8	0.0438761
772	0.293803	772	0.18137	772	0.10211	772	0.0630712	772	0.0404723
772.2	0.294491	772.2	0.190151	772.2	0.0992924	772.2	0.0660237	772.2	0.0434495
772.4	0.296683	772.4	0.180977	772.4	0.103931	772.4	0.0660166	772.4	0.0378733
772.6	0.297079	772.6	0.185966	772.6	0.103792	772.6	0.0604956	772.6	0.0393437
772.8	0.291973	772.8	0.184397	772.8	0.102664	772.8	0.0614008	772.8	0.0464975
773	0.286361	773	0.183034	773	0.10566	773	0.0607311	773	0.0373606
773.2	0.294806	773.2	0.182904	773.2	0.107067	773.2	0.0634666	773.2	0.0414488
773.4	0.296002	773.4	0.185504	773.4	0.104419	773.4	0.0665151	773.4	0.0390569
773.6	0.296977	773.6	0.185632	773.6	0.102113	773.6	0.0660832	773.6	0.0379347
773.8	0.300125	773.8	0.186528	773.8	0.102545	773.8	0.0622799	773.8	0.0397994
774	0.293788	774	0.183939	774	0.103988	774	0.0670275	774	0.0393955
774.2	0.296982	774.2	0.186061	774.2	0.10531	774.2	0.0655844	774.2	0.0406318
774.4	0.294704	774.4	0.184741	774.4	0.104429	774.4	0.0656846	774.4	0.042991
774.6	0.294734	774.6	0.188011	774.6	0.105054	774.6	0.0637654	774.6	0.0418941
774.8	0.293721	774.8	0.182857	774.8	0.101179	774.8	0.0643682	774.8	0.0435765
775	0.295877	775	0.186872	775	0.104937	775	0.06715	775	0.0421961
775.2	0.300006	775.2	0.186786	775.2	0.105047	775.2	0.0658551	775.2	0.0426207
775.4	0.293026	775.4	0.188402	775.4	0.0996371	775.4	0.0622469	775.4	0.0395066
775.6	0.2977	775.6	0.18673	775.6	0.109598	775.6	0.0658547	775.6	0.0414613
775.8	0.297399	775.8	0.190211	775.8	0.105263	775.8	0.0657795	775.8	0.0421325
776	0.292714	776	0.187929	776	0.10506	776	0.0641477	776	0.043085
776.2	0.299823	776.2	0.187389	776.2	0.105158	776.2	0.0660474	776.2	0.0409171
776.4	0.295563	776.4	0.184871	776.4	0.10205	776.4	0.0679361	776.4	0.0428987
776.6	0.299901	776.6	0.187967	776.6	0.104505	776.6	0.0622752	776.6	0.0409637
776.8	0.299153	776.8	0.185046	776.8	0.1053	776.8	0.0660934	776.8	0.0416646
777	0.298978	777	0.187152	777	0.1047	777	0.0627454	777	0.0365145
777.2	0.298649	777.2	0.187358	777.2	0.103785	777.2	0.06735	777.2	0.0441441
777.4	0.301745	777.4	0.1896	777.4	0.10575	777.4	0.0640191	777.4	0.0417647
777.6	0.301613	777.6	0.18846	777.6	0.105175	777.6	0.0621848	777.6	0.0411163
777.8	0.302722	777.8	0.19042	777.8	0.107431	777.8	0.0679715	777.8	0.0396898
778	0.29589	778	0.189978	778	0.108867	778	0.0605449	778	0.0425253
778.2	0.298416	778.2	0.18895	778.2	0.110094	778.2	0.0688796	778.2	0.0409631
778.4	0.300365	778.4	0.188571	778.4	0.105635	778.4	0.0626918	778.4	0.0441647
778.6	0.303295	778.6	0.186088	778.6	0.106679	778.6	0.0672328	778.6	0.0442469
778.8	0.30244	778.8	0.19525	778.8	0.108251	778.8	0.0608369	778.8	0.0418605
779	0.30214	779	0.185218	779	0.10508	779	0.0675461	779	0.0420548
779.2	0.303937	779.2	0.188189	779.2	0.107152	779.2	0.0656922	779.2	0.044402
779.4	0.30147	779.4	0.186778	779.4	0.106857	779.4	0.0642199	779.4	0.0435184
779.6	0.302604	779.6	0.191794	779.6	0.107728	779.6	0.0646157	779.6	0.0410092
779.8	0.304854	779.8	0.189968	779.8	0.107536	779.8	0.0679806	779.8	0.0425479
780	0.306367	780	0.188617	780	0.103402	780	0.0656059	780	0.0447591
780.2	0.306181	780.2	0.192535	780.2	0.10713	780.2	0.0596003	780.2	0.0426803
780.4	0.30233	780.4	0.189457	780.4	0.110757	780.4	0.0620526	780.4	0.0441983
780.6	0.303029	780.6	0.190504	780.6	0.110427	780.6	0.0680286	780.6	0.0439662
780.8	0.305283	780.8	0.185914	780.8	0.10337	780.8	0.0695931	780.8	0.0423048
781	0.306722	781	0.188967	781	0.106228	781	0.0690231	781	0.0438621
781.2	0.304451	781.2	0.193106	781.2	0.109308	781.2	0.0660423	781.2	0.0453844
781.4	0.308984	781.4	0.194471	781.4	0.104204	781.4	0.0683993	781.4	0.0447439
781.6	0.299727	781.6	0.194391	781.6	0.107614	781.6	0.0631113	781.6	0.0424363
781.8	0.309853	781.8	0.192475	781.8	0.110109	781.8	0.064375	781.8	0.0435055
782	0.305706	782	0.190555	782	0.108713	782	0.0660057	782	0.0426233
782.2	0.30645	782.2	0.190296	782.2	0.111514	782.2	0.0656684	782.2	0.0428594
782.4	0.305216	782.4	0.192551	782.4	0.110144	782.4	0.0688883	782.4	0.0414054
782.6	0.302334	782.6	0.193415	782.6	0.110696	782.6	0.0655317	782.6	0.0435157
782.8	0.307122	782.8	0.191636	782.8	0.109771	782.8	0.0695038	782.8	0.0408792
783	0.307853	783	0.189032	783	0.110396	783	0.0689409	783	0.0431797
783.2	0.30716	783.2	0.194007	783.2	0.111736	783.2	0.065437	783.2	0.0429315
783.4	0.308859	783.4	0.192899	783.4	0.111901	783.4	0.0642414	783.4	0.0428702
783.6	0.305076	783.6	0.193565	783.6	0.111306	783.6	0.0637089	783.6	0.0385251
783.8	0.303948	783.8	0.196698	783.8	0.109962	783.8	0.0659739	783.8	0.0490712
784	0.305735	784	0.191603	784	0.105329	784	0.0686783	784	0.0394942
784.2	0.308593	784.2	0.194962	784.2	0.111712	784.2	0.0699249	784.2	0.0434021
784.4	0.308762	784.4	0.19171	784.4	0.107459	784.4	0.0680383	784.4	0.0464982
784.6	0.30789	784.6	0.192787	784.6	0.105677	784.6	0.0664024	784.6	0.0444645
784.8	0.308487	784.8	0.190586	784.8	0.114795	784.8	0.0677968	784.8	0.0475293
785	0.311157	785	0.191882	785	0.1069	785	0.068721	785	0.0450099
785.2	0.31416	785.2	0.194913	785.2	0.109362	785.2	0.0682146	785.2	0.0409979
785.4	0.306088	785.4	0.193653	785.4	0.11113	785.4	0.0694474	785.4	0.0444692
785.6	0.309827	785.6	0.197483	785.6	0.111265	785.6	0.0686621	785.6	0.0466113
785.8	0.311181	785.8	0.197152	785.8	0.105861	785.8	0.0639351	785.8	0.0420402
786	0.311492	786	0.193797	786	0.110068	786	0.0628702	786	0.0435228
786.2	0.311275	786.2	0.196014	786.2	0.113868	786.2	0.0657504	786.2	0.0439213
786.4	0.314016	786.4	0.195536	786.4	0.111756	786.4	0.0692331	786.4	0.0436876
786.6	0.313731	786.6	0.196401	786.6	0.10748	786.6	0.071352	786.6	0.0446546
786.8	0.314255	786.8	0.195199	786.8	0.110269	786.8	0.068232	786.8	0.03992
787	0.311793	787	0.195578	787	0.1106	787	0.064904	787	0.0433692
787.2	0.310767	787.2	0.196451	787.2	0.111327	787.2	0.0673551	787.2	0.0438736
787.4	0.312147	787.4	0.193562	787.4	0.108384	787.4	0.0682898	787.4	0.0427612
787.6	0.308428	787.6	0.197104	787.6	0.112566	787.6	0.0683707	787.6	0.0465644
787.8	0.312874	787.8	0.196048	787.8	0.108319	787.8	0.0677944	787.8	0.0442698
788	0.313525	788	0.193827	788	0.112945	788	0.071288	788	0.0421883
788.2	0.311922	788.2	0.196779	788.2	0.113821	788.2	0.0649844	788.2	0.0471859
788.4	0.315504	788.4	0.198424	788.4	0.10935	788.4	0.065615	788.4	0.044217
788.6	0.321572	788.6	0.194413	788.6	0.111602	788.6	0.0690115	788.6	0.043708
788.8	0.312366	788.8	0.195753	788.8	0.113398	788.8	0.0647063	788.8	0.0471577
789	0.311772	789	0.195	789	0.112809	789	0.0681394	789	0.0425354
789.2	0.315525	789.2	0.196965	789.2	0.109636	789.2	0.072951	789.2	0.0448125
789.4	0.314473	789.4	0.199198	789.4	0.115082	789.4	0.0720086	789.4	0.0438667
789.6	0.311462	789.6	0.19692	789.6	0.111807	789.6	0.0660609	789.6	0.0442155
789.8	0.313624	789.8	0.193598	789.8	0.109863	789.8	0.0714249	789.8	0.0467132
790	0.310338	790	0.202741	790	0.110175	790	0.0692825	790	0.0464101
790.2	0.315056	790.2	0.197355	790.2	0.11447	790.2	0.067175	790.2	0.045618
790.4	0.315037	790.4	0.198007	790.4	0.113801	790.4	0.0684511	790.4	0.0471114
790.6	0.316191	790.6	0.198691	790.6	0.113448	790.6	0.0688675	790.6	0.0449009
790.8	0.31651	790.8	0.198848	790.8	0.111632	790.8	0.0654639	790.8	0.047624
791	0.313199	791	0.198648	791	0.1121	791	0.0685604	791	0.0445837
791.2	0.316626	791.2	0.199067	791.2	0.110981	791.2	0.0709548	791.2	0.0471059
791.4	0.31228	791.4	0.19809	791.4	0.115131	791.4	0.0653404	791.4	0.0448757
791.6	0.317542	791.6	0.197669	791.6	0.110734	791.6	0.067831	791.6	0.0448209
791.8	0.314012	791.8	0.199404	791.8	0.114843	791.8	0.0673488	791.8	0.0472439
792	0.314685	792	0.203237	792	0.111607	792	0.0677616	792	0.0419821
792.2	0.31874	792.2	0.197953	792.2	0.111044	792.2	0.0676169	792.2	0.0464569
792.4	0.320317	792.4	0.200131	792.4	0.110582	792.4	0.0724581	792.4	0.0433412
792.6	0.318221	792.6	0.198441	792.6	0.1121	792.6	0.0680525	792.6	0.0480165
792.8	0.321712	792.8	0.201808	792.8	0.113774	792.8	0.0674409	792.8	0.0444969
793	0.31924	793	0.20148	793	0.117371	793	0.072908	793	0.0476915
793.2	0.316332	793.2	0.198938	793.2	0.113908	793.2	0.0650988	793.2	0.0448818
793.4	0.321109	793.4	0.202165	793.4	0.11521	793.4	0.072198	793.4	0.0436171
793.6	0.318781	793.6	0.201072	793.6	0.109419	793.6	0.0693152	793.6	0.0427106
793.8	0.31653	793.8	0.201524	793.8	0.108354	793.8	0.0708961	793.8	0.0426973
794	0.319244	794	0.202663	794	0.11833	794	0.0697615	794	0.0441789
794.2	0.320975	794.2	0.203464	794.2	0.115602	794.2	0.0670692	794.2	0.0447326
794.4	0.316101	794.4	0.201652	794.4	0.112341	794.4	0.069442	794.4	0.0498618
794.6	0.320291	794.6	0.204667	794.6	0.117218	794.6	0.0688302	794.6	0.044035
794.8	0.322165	794.8	0.198671	794.8	0.113345	794.8	0.0681061	794.8	0.041179
795	0.321844	795	0.203056	795	0.110655	795	0.0708953	795	0.0486787
795.2	0.322931	795.2	0.205173	795.2	0.113934	795.2	0.0703928	795.2	0.0471022
795.4	0.321343	795.4	0.19934	795.4	0.117969	795.4	0.0716613	795.4	0.0427755
795.6	0.320899	795.6	0.200109	795.6	0.115234	795.6	0.0671816	795.6	0.0457566
795.8	0.321768	795.8	0.200123	795.8	0.117505	795.8	0.0765564	795.8	0.0444198
796	0.321729	796	0.203707	796	0.117874	796	0.0694587	796	0.040866
796.2	0.32193	796.2	0.202969	796.2	0.114491	796.2	0.0750133	796.2	0.0449176
796.4	0.31874	796.4	0.203329	796.4	0.109972	796.4	0.0695474	796.4	0.0427513
796.6	0.323428	796.6	0.201298	796.6	0.114754	796.6	0.0710741	796.6	0.044527
796.8	0.323807	796.8	0.198331	796.8	0.112841	796.8	0.0721769	796.8	0.0511061
797	0.325	797	0.204551	797	0.116162	797	0.0695745	797	0.043293
797.2	0.325971	797.2	0.199259	797.2	0.114756	797.2	0.0715209	797.2	0.0436945
797.4	0.322871	797.4	0.208435	797.4	0.112797	797.4	0.0716569	797.4	0.0462942
797.6	0.326814	797.6	0.201784	797.6	0.113401	797.6	0.0720204	797.6	0.0457847
797.8	0.322009	797.8	0.201872	797.8	0.116	797.8	0.0695345	797.8	0.0444385
798	0.324062	798	0.205149	798	0.11896	798	0.0729973	798	0.04293
798.2	0.327345	798.2	0.205352	798.2	0.116243	798.2	0.0720287	798.2	0.0478777
798.4	0.329755	798.4	0.203455	798.4	0.115192	798.4	0.0710105	798.4	0.0457003
798.6	0.32231	798.6	0.206985	798.6	0.117537	798.6	0.0736304	798.6	0.0488064
798.8	0.325023	798.8	0.20468	798.8	0.115267	798.8	0.0701708	798.8	0.045009
799	0.32587	799	0.204321	799	0.116825	799	0.0713118	799	0.0451733
799.2	0.326052	799.2	0.206093	799.2	0.115645	799.2	0.0677701	799.2	0.0459435
799.4	0.330297	799.4	0.207508	799.4	0.117572	799.4	0.0742797	799.4	0.0525756
799.6	0.328705	799.6	0.202231	799.6	0.115784	799.6	0.0754733	799.6	0.0457083
799.8	0.326027	799.8	0.204739	799.8	0.117356	799.8	0.0744672	799.8	0.0472207
800	0.323659	800	0.210155	800	0.115472	800	0.0723526	800	0.0432826
800.2	0.326103	800.2	0.210518	800.2	0.114634	800.2	0.0710629	800.2	0.0462494
800.4	0.329164	800.4	0.207744	800.4	0.116146	800.4	0.0691247	800.4	0.0429831
800.6	0.329079	800.6	0.204104	800.6	0.115705	800.6	0.0721231	800.6	0.0437742
800.8	0.326744	800.8	0.206549	800.8	0.117513	800.8	0.0696335	800.8	0.0460269
801	0.330304	801	0.203886	801	0.11689	801	0.0765209	801	0.0466235
801.2	0.328526	801.2	0.209368	801.2	0.11487	801.2	0.0733686	801.2	0.0449093
801.4	0.329234	801.4	0.20256	801.4	0.118145	801.4	0.0758688	801.4	0.0484034
801.6	0.327125	801.6	0.205868	801.6	0.112649	801.6	0.0695949	801.6	0.0458819
801.8	0.32446	801.8	0.206672	801.8	0.116575	801.8	0.0701161	801.8	0.047223
802	0.326308	802	0.206279	802	0.11561	802	0.075868	802	0.0473497
802.2	0.328102	802.2	0.20777	802.2	0.113804	802.2	0.0692809	802.2	0.0460072
802.4	0.330906	802.4	0.206798	802.4	0.116052	802.4	0.0709055	802.4	0.048489
802.6	0.329698	802.6	0.207651	802.6	0.11486	802.6	0.0726819	802.6	0.0460845
802.8	0.331704	802.8	0.206388	802.8	0.114232	802.8	0.0751638	802.8	0.0473909
803	0.33009	803	0.208239	803	0.117966	803	0.0709294	803	0.0439843
803.2	0.33607	803.2	0.210739	803.2	0.118171	803.2	0.0736515	803.2	0.04914
803.4	0.334441	803.4	0.20678	803.4	0.117403	803.4	0.0720484	803.4	0.0476197
803.6	0.331495	803.6	0.207519	803.6	0.11587	803.6	0.0706095	803.6	0.0460593
803.8	0.329956	803.8	0.209342	803.8	0.123409	803.8	0.0704573	803.8	0.0495786
804	0.335415	804	0.207945	804	0.123006	804	0.071441	804	0.0472964
804.2	0.33068	804.2	0.20936	804.2	0.116286	804.2	0.0707202	804.2	0.046105
804.4	0.331049	804.4	0.210622	804.4	0.122258	804.4	0.0731395	804.4	0.0487703
804.6	0.335936	804.6	0.211026	804.6	0.115095	804.6	0.0740739	804.6	0.0460045
804.8	0.330653	804.8	0.21054	804.8	0.116724	804.8	0.0724012	804.8	0.044421
805	0.332954	805	0.211496	805	0.118281	805	0.0707701	805	0.0434641
805.2	0.333753	805.2	0.20806	805.2	0.117028	805.2	0.0735491	805.2	0.0487483
805.4	0.334918	805.4	0.210081	805.4	0.123039	805.4	0.0729023	805.4	0.050353
805.6	0.329663	805.6	0.211393	805.6	0.116703	805.6	0.0723341	805.6	0.0449097
805.8	0.336	805.8	0.210367	805.8	0.116645	805.8	0.0744428	805.8	0.0474198
806	0.334887	806	0.208029	806	0.119738	806	0.0721298	806	0.0476533
806.2	0.336415	806.2	0.211101	806.2	0.121287	806.2	0.0749068	806.2	0.0482226
806.4	0.332856	806.4	0.212719	806.4	0.121823	806.4	0.0731285	806.4	0.0519756
806.6	0.337949	806.6	0.210264	806.6	0.119445	806.6	0.0760904	806.6	0.046214
806.8	0.335397	806.8	0.212465	806.8	0.119431	806.8	0.0728611	806.8	0.0449151
807	0.337865	807	0.210876	807	0.11862	807	0.0707439	807	0.0500907
807.2	0.337831	807.2	0.212009	807.2	0.121192	807.2	0.0689696	807.2	0.0502081
807.4	0.333434	807.4	0.210045	807.4	0.116111	807.4	0.074987	807.4	0.049968
807.6	0.338682	807.6	0.210512	807.6	0.120009	807.6	0.0765258	807.6	0.0453436
807.8	0.337747	807.8	0.210033	807.8	0.118223	807.8	0.0724669	807.8	0.0489566
808	0.337279	808	0.211429	808	0.119133	808	0.0725858	808	0.0469542
808.2	0.336408	808.2	0.210923	808.2	0.119394	808.2	0.0734546	808.2	0.0485357
808.4	0.339905	808.4	0.212075	808.4	0.123073	808.4	0.0733562	808.4	0.0490893
808.6	0.342222	808.6	0.212325	808.6	0.117614	808.6	0.0753179	808.6	0.0466353
808.8	0.339697	808.8	0.212477	808.8	0.120067	808.8	0.0777874	808.8	0.0482265
809	0.341697	809	0.214884	809	0.121088	809	0.0733649	809	0.0477844
809.2	0.338745	809.2	0.215345	809.2	0.122421	809.2	0.077485	809.2	0.0474834
809.4	0.338215	809.4	0.213833	809.4	0.125821	809.4	0.0773534	809.4	0.0488189
809.6	0.337116	809.6	0.213936	809.6	0.115899	809.6	0.074756	809.6	0.0471443
809.8	0.337049	809.8	0.213992	809.8	0.121148	809.8	0.0752615	809.8	0.049748
810	0.343438	810	0.211403	810	0.118469	810	0.0706901	810	0.0458603
810.2	0.337852	810.2	0.212681	810.2	0.123927	810.2	0.0759127	810.2	0.0515627
810.4	0.341204	810.4	0.213335	810.4	0.121652	810.4	0.0736833	810.4	0.046405
810.6	0.340468	810.6	0.212814	810.6	0.119492	810.6	0.0732776	810.6	0.0479727
810.8	0.342436	810.8	0.21497	810.8	0.118855	810.8	0.0715938	810.8	0.0477883
811	0.340348	811	0.213243	811	0.122986	811	0.073007	811	0.0495087
811.2	0.339461	811.2	0.217344	811.2	0.123289	811.2	0.070278	811.2	0.0495298
811.4	0.343261	811.4	0.214049	811.4	0.124166	811.4	0.0761902	811.4	0.0529879
811.6	0.341864	811.6	0.21524	811.6	0.117309	811.6	0.0779932	811.6	0.0497134
811.8	0.341652	811.8	0.214668	811.8	0.119674	811.8	0.0760168	811.8	0.0456652
812	0.344354	812	0.216416	812	0.122969	812	0.0751433	812	0.0468734
812.2	0.339078	812.2	0.21405	812.2	0.123914	812.2	0.0742923	812.2	0.0511395
812.4	0.344637	812.4	0.216707	812.4	0.122464	812.4	0.0705386	812.4	0.044575
812.6	0.342071	812.6	0.215296	812.6	0.119804	812.6	0.0728764	812.6	0.0500516
812.8	0.34431	812.8	0.215012	812.8	0.120543	812.8	0.0748573	812.8	0.0481082
813	0.34534	813	0.213916	813	0.122044	813	0.073006	813	0.0466295
813.2	0.344361	813.2	0.21885	813.2	0.121258	813.2	0.0744719	813.2	0.0494517
813.4	0.342864	813.4	0.214471	813.4	0.117823	813.4	0.0732243	813.4	0.0467822
813.6	0.345381	813.6	0.21842	813.6	0.122666	813.6	0.0753105	813.6	0.0452105
813.8	0.348353	813.8	0.220656	813.8	0.121294	813.8	0.076385	813.8	0.0482514
814	0.343941	814	0.22123	814	0.120642	814	0.0765552	814	0.0513815
814.2	0.34508	814.2	0.216068	814.2	0.124739	814.2	0.0773298	814.2	0.0487495
814.4	0.343543	814.4	0.217002	814.4	0.119124	814.4	0.0761655	814.4	0.0486429
814.6	0.342639	814.6	0.218789	814.6	0.125374	814.6	0.0752124	814.6	0.0500498
814.8	0.345453	814.8	0.218198	814.8	0.124514	814.8	0.0752419	814.8	0.0511961
815	0.343833	815	0.216162	815	0.122475	815	0.078132	815	0.0539977
815.2	0.342043	815.2	0.220969	815.2	0.118242	815.2	0.0754497	815.2	0.0519855
815.4	0.346589	815.4	0.217997	815.4	0.124178	815.4	0.0723107	815.4	0.0532485
815.6	0.347059	815.6	0.215434	815.6	0.11974	815.6	0.0741963	815.6	0.0498866
815.8	0.347716	815.8	0.216255	815.8	0.120315	815.8	0.0746386	815.8	0.0535104
816	0.349049	816	0.217166	816	0.124512	816	0.0754886	816	0.0495077
816.2	0.346837	816.2	0.221995	816.2	0.117809	816.2	0.0759308	816.2	0.0484733
816.4	0.348675	816.4	0.221116	816.4	0.128352	816.4	0.0773304	816.4	0.0490674
816.6	0.348088	816.6	0.218153	816.6	0.120931	816.6	0.0771936	816.6	0.0495005
816.8	0.349402	816.8	0.219553	816.8	0.125713	816.8	0.0727747	816.8	0.0475827
817	0.34569	817	0.217512	817	0.123167	817	0.0725334	817	0.0478154
817.2	0.351288	817.2	0.216886	817.2	0.123203	817.2	0.0780246	817.2	0.0494221
817.4	0.347712	817.4	0.222342	817.4	0.123401	817.4	0.0768142	817.4	0.0485253
817.6	0.349146	817.6	0.220326	817.6	0.125158	817.6	0.076708	817.6	0.0487558
817.8	0.350813	817.8	0.220501	817.8	0.123801	817.8	0.0726175	817.8	0.0483015
818	0.353346	818	0.218668	818	0.12307	818	0.0759598	818	0.0505865
818.2	0.353947	818.2	0.223546	818.2	0.122965	818.2	0.0792208	818.2	0.0502268
818.4	0.348097	818.4	0.223967	818.4	0.127203	818.4	0.0771506	818.4	0.0493029
818.6	0.348776	818.6	0.221012	818.6	0.124069	818.6	0.0742413	818.6	0.0520326
818.8	0.353879	818.8	0.218715	818.8	0.126794	818.8	0.0773944	818.8	0.0489595
819	0.352273	819	0.223502	819	0.121498	819	0.0742859	819	0.0500193
819.2	0.350639	819.2	0.217554	819.2	0.123907	819.2	0.0777741	819.2	0.0496098
819.4	0.352629	819.4	0.220186	819.4	0.124763	819.4	0.0777521	819.4	0.0511544
819.6	0.349972	819.6	0.224971	819.6	0.125928	819.6	0.0717752	819.6	0.0518156
819.8	0.347347	819.8	0.219828	819.8	0.122143	819.8	0.0789258	819.8	0.0517982
820	0.350289	820	0.21951	820	0.125087	820	0.0759566	820	0.0488082
820.2	0.351796	820.2	0.219187	820.2	0.124442	820.2	0.0780257	820.2	0.0476007
820.4	0.355575	820.4	0.218784	820.4	0.120529	820.4	0.0762095	820.4	0.0471525
820.6	0.352003	820.6	0.222919	820.6	0.124349	820.6	0.0774105	820.6	0.0494415
820.8	0.352874	820.8	0.221527	820.8	0.125385	820.8	0.0786799	820.8	0.0495084
821	0.353742	821	0.221291	821	0.128692	821	0.0784648	821	0.0518118
821.2	0.352424	821.2	0.220506	821.2	0.124695	821.2	0.0744569	821.2	0.0503971
821.4	0.353469	821.4	0.221749	821.4	0.129108	821.4	0.0745755	821.4	0.0508631
821.6	0.354097	821.6	0.222295	821.6	0.123086	821.6	0.0818529	821.6	0.0524946
821.8	0.354918	821.8	0.222906	821.8	0.128336	821.8	0.0794267	821.8	0.0489535
822	0.352992	822	0.223987	822	0.130785	822	0.0768553	822	0.0520209
822.2	0.352402	822.2	0.220921	822.2	0.125429	822.2	0.076858	822.2	0.0510346
822.4	0.357624	822.4	0.222094	822.4	0.127782	822.4	0.0771298	822.4	0.0450244
822.6	0.356195	822.6	0.224352	822.6	0.126971	822.6	0.0757639	822.6	0.0506647
822.8	0.353812	822.8	0.221032	822.8	0.126437	822.8	0.0768113	822.8	0.0487782
823	0.358304	823	0.226166	823	0.12562	823	0.0776604	823	0.0519003
823.2	0.357073	823.2	0.223767	823.2	0.124304	823.2	0.0737568	823.2	0.0491939
823.4	0.355471	823.4	0.222795	823.4	0.129368	823.4	0.0776379	823.4	0.0536282
823.6	0.352135	823.6	0.226501	823.6	0.122499	823.6	0.0774319	823.6	0.0516509
823.8	0.353788	823.8	0.223012	823.8	0.125791	823.8	0.0785773	823.8	0.0527033
824	0.354389	824	0.222678	824	0.128939	824	0.0758781	824	0.0524776
824.2	0.359293	824.2	0.222427	824.2	0.12734	824.2	0.0799222	824.2	0.0502998
824.4	0.354028	824.4	0.225672	824.4	0.12813	824.4	0.0789264	824.4	0.0519715
824.6	0.358139	824.6	0.231905	824.6	0.130731	824.6	0.0758489	824.6	0.0473607
824.8	0.361357	824.8	0.226936	824.8	0.126963	824.8	0.0793766	824.8	0.0498822
825	0.355757	825	0.226186	825	0.12691	825	0.0790711	825	0.0521051
825.2	0.363533	825.2	0.221602	825.2	0.127679	825.2	0.0805628	825.2	0.0492983
825.4	0.361169	825.4	0.22432	825.4	0.127032	825.4	0.0767291	825.4	0.0500692
825.6	0.359388	825.6	0.223625	825.6	0.130993	825.6	0.0775697	825.6	0.0530534
825.8	0.358135	825.8	0.222856	825.8	0.124374	825.8	0.0828688	825.8	0.0477906
826	0.358073	826	0.22989	826	0.131945	826	0.0751713	826	0.0491459
826.2	0.358167	826.2	0.222774	826.2	0.127922	826.2	0.0787728	826.2	0.0536965
826.4	0.359481	826.4	0.225248	826.4	0.127451	826.4	0.0759053	826.4	0.050059
826.6	0.359083	826.6	0.226323	826.6	0.129127	826.6	0.0756716	826.6	0.0505258
826.8	0.360676	826.8	0.228015	826.8	0.127298	826.8	0.0791131	826.8	0.0495581
827	0.363043	827	0.230512	827	0.127452	827	0.0771189	827	0.0516476
827.2	0.359955	827.2	0.228639	827.2	0.126144	827.2	0.0819668	827.2	0.0470618
827.4	0.363486	827.4	0.226975	827.4	0.131142	827.4	0.0777927	827.4	0.0510904
827.6	0.360162	827.6	0.229373	827.6	0.130106	827.6	0.0770748	827.6	0.0512109
827.8	0.361893	827.8	0.227509	827.8	0.130019	827.8	0.0792714	827.8	0.0531963
828	0.362843	828	0.226465	828	0.127739	828	0.0795237	828	0.0514146
828.2	0.3608	828.2	0.226874	828.2	0.129941	828.2	0.0778517	828.2	0.0526247
828.4	0.361556	828.4	0.222831	828.4	0.130291	828.4	0.0774031	828.4	0.0539583
828.6	0.360684	828.6	0.226771	828.6	0.125599	828.6	0.0821459	828.6	0.0548268
828.8	0.357194	828.8	0.227423	828.8	0.131361	828.8	0.0825804	828.8	0.0501655
829	0.3623	829	0.227277	829	0.131058	829	0.0788687	829	0.0527731
829.2	0.362327	829.2	0.226395	829.2	0.130571	829.2	0.0777811	829.2	0.0547303
829.4	0.362115	829.4	0.228556	829.4	0.125241	829.4	0.0793182	829.4	0.0529601
829.6	0.363995	829.6	0.229874	829.6	0.12677	829.6	0.0797375	829.6	0.0509014
829.8	0.361545	829.8	0.230842	829.8	0.130423	829.8	0.0795074	829.8	0.0502997
830	0.363437	830	0.227587	830	0.126731	830	0.0803055	830	0.0507255
830.2	0.363221	830.2	0.231147	830.2	0.126363	830.2	0.0818544	830.2	0.0521159
830.4	0.363694	830.4	0.226786	830.4	0.130454	830.4	0.0835832	830.4	0.0503435
830.6	0.363152	830.6	0.230537	830.6	0.130363	830.6	0.079269	830.6	0.0513415
830.8	0.367129	830.8	0.229185	830.8	0.12929	830.8	0.080379	830.8	0.0518014
831	0.364761	831	0.228759	831	0.13279	831	0.078378	831	0.0520371
831.2	0.365534	831.2	0.230603	831.2	0.127936	831.2	0.0770249	831.2	0.0504476
831.4	0.362217	831.4	0.229714	831.4	0.129071	831.4	0.079632	831.4	0.0486615
831.6	0.362388	831.6	0.228413	831.6	0.130603	831.6	0.0807822	831.6	0.0520844
831.8	0.366561	831.8	0.23227	831.8	0.132597	831.8	0.0811191	831.8	0.0492422
832	0.365003	832	0.231004	832	0.12916	832	0.0781072	832	0.0527516
832.2	0.365367	832.2	0.232625	832.2	0.124228	832.2	0.0801857	832.2	0.0509646
832.4	0.365671	832.4	0.232915	832.4	0.127856	832.4	0.0808242	832.4	0.0544927
832.6	0.368705	832.6	0.231312	832.6	0.134053	832.6	0.0833016	832.6	0.0540634
832.8	0.368347	832.8	0.22549	832.8	0.128255	832.8	0.0806569	832.8	0.0526903
833	0.368799	833	0.231995	833	0.128801	833	0.0789011	833	0.0495385
833.2	0.367908	833.2	0.228436	833.2	0.12791	833.2	0.0823579	833.2	0.0522458
833.4	0.369445	833.4	0.232693	833.4	0.1297	833.4	0.0801219	833.4	0.0522359
833.6	0.369004	833.6	0.234017	833.6	0.131151	833.6	0.0808895	833.6	0.0536534
833.8	0.370672	833.8	0.231146	833.8	0.131198	833.8	0.0818149	833.8	0.0558445
834	0.374238	834	0.233177	834	0.132648	834	0.0753934	834	0.0550553
834.2	0.368087	834.2	0.23328	834.2	0.131204	834.2	0.081196	834.2	0.0527782
834.4	0.367707	834.4	0.233817	834.4	0.136507	834.4	0.0819309	834.4	0.0516133
834.6	0.367511	834.6	0.228237	834.6	0.129879	834.6	0.0783669	834.6	0.0496348
834.8	0.367323	834.8	0.233778	834.8	0.128064	834.8	0.0833578	834.8	0.0479359
835	0.368887	835	0.23297	835	0.131113	835	0.0778689	835	0.0553332
835.2	0.367178	835.2	0.23285	835.2	0.128252	835.2	0.0775485	835.2	0.0511085
835.4	0.369456	835.4	0.234548	835.4	0.132851	835.4	0.0831216	835.4	0.0562522
835.6	0.362872	835.6	0.235058	835.6	0.127223	835.6	0.0798854	835.6	0.0543996
835.8	0.37151	835.8	0.229821	835.8	0.126238	835.8	0.0805299	835.8	0.0517009
836	0.370019	836	0.233892	836	0.131275	836	0.0822608	836	0.0503876
836.2	0.371987	836.2	0.233986	836.2	0.13264	836.2	0.0819058	836.2	0.0562618
836.4	0.368141	836.4	0.232843	836.4	0.132205	836.4	0.0827805	836.4	0.0563265
836.6	0.371541	836.6	0.231871	836.6	0.131481	836.6	0.0806317	836.6	0.0556295
836.8	0.372135	836.8	0.232902	836.8	0.132126	836.8	0.0777054	836.8	0.0528981
837	0.370387	837	0.233034	837	0.132642	837	0.0818829	837	0.048743
837.2	0.372825	837.2	0.235481	837.2	0.131494	837.2	0.0790496	837.2	0.0511853
837.4	0.373356	837.4	0.236387	837.4	0.131273	837.4	0.0795754	837.4	0.0541039
837.6	0.36976	837.6	0.233756	837.6	0.132831	837.6	0.0850817	837.6	0.0532421
837.8	0.37335	837.8	0.235036	837.8	0.131101	837.8	0.0821081	837.8	0.0491083
838	0.372347	838	0.234747	838	0.131761	838	0.0816813	838	0.0518667
838.2	0.369603	838.2	0.238025	838.2	0.130842	838.2	0.077805	838.2	0.0506952
838.4	0.373267	838.4	0.232209	838.4	0.132654	838.4	0.0828805	838.4	0.0569782
838.6	0.372113	838.6	0.236067	838.6	0.131795	838.6	0.0843482	838.6	0.0564803
838.8	0.376898	838.8	0.234675	838.8	0.13348	838.8	0.0801292	838.8	0.0555552
839	0.372003	839	0.233567	839	0.137189	839	0.0808056	839	0.0511576
839.2	0.375137	839.2	0.231471	839.2	0.127541	839.2	0.079022	839.2	0.0540821
839.4	0.373146	839.4	0.235805	839.4	0.131337	839.4	0.0819301	839.4	0.0519582
839.6	0.369181	839.6	0.238466	839.6	0.133378	839.6	0.084498	839.6	0.0538119
839.8	0.371693	839.8	0.235366	839.8	0.132455	839.8	0.0816815	839.8	0.0529106
840	0.37602	840	0.235377	840	0.133273	840	0.0820026	840	0.0513783
840.2	0.379291	840.2	0.23346	840.2	0.134159	840.2	0.0805952	840.2	0.0546708
840.4	0.371687	840.4	0.23574	840.4	0.134757	840.4	0.0823665	840.4	0.0520782
840.6	0.37636	840.6	0.235487	840.6	0.134263	840.6	0.0824509	840.6	0.0526743
840.8	0.378911	840.8	0.235004	840.8	0.134742	840.8	0.0847707	840.8	0.0553317
841	0.379938	841	0.23144	841	0.133302	841	0.0817117	841	0.0528147
841.2	0.375361	841.2	0.239031	841.2	0.131408	841.2	0.0860415	841.2	0.0537401
841.4	0.378318	841.4	0.241662	841.4	0.133123	841.4	0.0833095	841.4	0.0565293
841.6	0.375787	841.6	0.234086	841.6	0.132537	841.6	0.0817555	841.6	0.0543011
841.8	0.3768	841.8	0.239626	841.8	0.133001	841.8	0.0858607	841.8	0.0548613
842	0.379395	842	0.238538	842	0.132618	842	0.0834512	842	0.0518591
842.2	0.378102	842.2	0.237222	842.2	0.135965	842.2	0.0836226	842.2	0.0521206
842.4	0.378468	842.4	0.233221	842.4	0.136081	842.4	0.0828546	842.4	0.0554963
842.6	0.376297	842.6	0.238344	842.6	0.134979	842.6	0.0838218	842.6	0.0564816
842.8	0.375804	842.8	0.239987	842.8	0.131826	842.8	0.0805955	842.8	0.0526467
843	0.381679	843	0.240376	843	0.133508	843	0.0828485	843	0.0560103
843.2	0.378937	843.2	0.236248	843.2	0.136151	843.2	0.0808544	843.2	0.050455
843.4	0.379623	843.4	0.238433	843.4	0.136168	843.4	0.0817544	843.4	0.0538668
843.6	0.380881	843.6	0.241645	843.6	0.135093	843.6	0.0817595	843.6	0.0520239
843.8	0.384118	843.8	0.242265	843.8	0.13451	843.8	0.0794514	843.8	0.0525776
844	0.383063	844	0.234819	844	0.134623	844	0.081893	844	0.0526981
844.2	0.383328	844.2	0.240852	844.2	0.136255	844.2	0.0831039	844.2	0.0542494
844.4	0.38203	844.4	0.24084	844.4	0.13634	844.4	0.079478	844.4	0.0555744
844.6	0.377644	844.6	0.241202	844.6	0.134258	844.6	0.0845879	844.6	0.0539408
844.8	0.374913	844.8	0.242826	844.8	0.137935	844.8	0.0831725	844.8	0.0557549
845	0.379488	845	0.241042	845	0.133744	845	0.085383	845	0.051605
845.2	0.379912	845.2	0.239675	845.2	0.137342	845.2	0.0814481	845.2	0.0534223
845.4	0.381281	845.4	0.241271	845.4	0.137875	845.4	0.0841716	845.4	0.0528935
845.6	0.382252	845.6	0.242577	845.6	0.135758	845.6	0.085941	845.6	0.055125
845.8	0.383065	845.8	0.239729	845.8	0.139113	845.8	0.083581	845.8	0.0545989
846	0.381036	846	0.24162	846	0.135438	846	0.0830919	846	0.0538964
846.2	0.383384	846.2	0.240167	846.2	0.136627	846.2	0.0831289	846.2	0.0539393
846.4	0.380681	846.4	0.241699	846.4	0.137504	846.4	0.083958	846.4	0.0530493
846.6	0.382695	846.6	0.242276	846.6	0.137114	846.6	0.0833861	846.6	0.0561725
846.8	0.382135	846.8	0.239437	846.8	0.139715	846.8	0.0852839	846.8	0.0564211
847	0.38511	847	0.239653	847	0.13676	847	0.0844828	847	0.0550785
847.2	0.384197	847.2	0.240735	847.2	0.136331	847.2	0.084318	847.2	0.0548373
847.4	0.383436	847.4	0.238726	847.4	0.139161	847.4	0.0864707	847.4	0.053725
847.6	0.383425	847.6	0.240956	847.6	0.138321	847.6	0.0840112	847.6	0.0530956
847.8	0.382587	847.8	0.244533	847.8	0.140117	847.8	0.0826395	847.8	0.0553008
848	0.378831	848	0.239589	848	0.134652	848	0.0876407	848	0.0548795
848.2	0.386755	848.2	0.243844	848.2	0.135916	848.2	0.0857651	848.2	0.0515128
848.4	0.383316	848.4	0.242066	848.4	0.137471	848.4	0.0868319	848.4	0.0541312
848.6	0.383099	848.6	0.24342	848.6	0.135995	848.6	0.0866654	848.6	0.0578091
848.8	0.384868	848.8	0.243898	848.8	0.137784	848.8	0.0847521	848.8	0.0528755
849	0.382467	849	0.242517	849	0.136652	849	0.0876927	849	0.0552088
849.2	0.386318	849.2	0.242119	849.2	0.136614	849.2	0.0851551	849.2	0.0539634
849.4	0.386199	849.4	0.23955	849.4	0.137478	849.4	0.082582	849.4	0.0555925
849.6	0.386092	849.6	0.244501	849.6	0.138979	849.6	0.0845652	849.6	0.055135
849.8	0.388618	849.8	0.239092	849.8	0.136954	849.8	0.0852298	849.8	0.0515139
850	0.388191	850	0.244806	850	0.140943	850	0.0863932	850	0.0567155
850.2	0.388466	850.2	0.244503	850.2	0.13572	850.2	0.0883724	850.2	0.0526143
850.4	0.390725	850.4	0.244627	850.4	0.136192	850.4	0.0872305	850.4	0.0557673
850.6	0.387236	850.6	0.246348	850.6	0.141031	850.6	0.0855962	850.6	0.0522657
850.8	0.392634	850.8	0.243601	850.8	0.136983	850.8	0.0867434	850.8	0.0559165
851	0.389579	851	0.246292	851	0.139339	851	0.0847489	851	0.0572681
851.2	0.388438	851.2	0.240162	851.2	0.139241	851.2	0.0843601	851.2	0.0535784
851.4	0.385925	851.4	0.245739	851.4	0.136266	851.4	0.0844441	851.4	0.0551382
851.6	0.389643	851.6	0.24624	851.6	0.137564	851.6	0.0839674	851.6	0.0540218
851.8	0.389768	851.8	0.247011	851.8	0.138174	851.8	0.0873783	851.8	0.0562042
852	0.389868	852	0.246849	852	0.141741	852	0.0855836	852	0.0546068
852.2	0.386263	852.2	0.247547	852.2	0.137461	852.2	0.0827796	852.2	0.0573044
852.4	0.385822	852.4	0.243557	852.4	0.138327	852.4	0.0870899	852.4	0.0545058
852.6	0.389466	852.6	0.247901	852.6	0.137452	852.6	0.0839546	852.6	0.0552514
852.8	0.391056	852.8	0.245497	852.8	0.142982	852.8	0.0869884	852.8	0.057921
853	0.386217	853	0.243885	853	0.140892	853	0.0859664	853	0.05102
853.2	0.391141	853.2	0.244094	853.2	0.139593	853.2	0.0847739	853.2	0.0560828
853.4	0.391839	853.4	0.248221	853.4	0.139112	853.4	0.0870222	853.4	0.0563586
853.6	0.38635	853.6	0.243215	853.6	0.139778	853.6	0.0867464	853.6	0.054695
853.8	0.393157	853.8	0.24186	853.8	0.140791	853.8	0.0894579	853.8	0.0576712
854	0.390639	854	0.245875	854	0.141745	854	0.0869034	854	0.0541809
854.2	0.394325	854.2	0.246736	854.2	0.140993	854.2	0.0843691	854.2	0.052873
854.4	0.389099	854.4	0.24814	854.4	0.135499	854.4	0.0874411	854.4	0.055625
854.6	0.392584	854.6	0.244658	854.6	0.141866	854.6	0.0860136	854.6	0.05696
854.8	0.38631	854.8	0.247501	854.8	0.139935	854.8	0.0846793	854.8	0.0577636
855	0.394459	855	0.244856	855	0.139096	855	0.0862391	855	0.0572181
855.2	0.392788	855.2	0.247456	855.2	0.135055	855.2	0.0839013	855.2	0.0570116
855.4	0.392897	855.4	0.247972	855.4	0.140811	855.4	0.0858458	855.4	0.0534404
855.6	0.393688	855.6	0.248327	855.6	0.141674	855.6	0.0861271	855.6	0.0558585
855.8	0.390992	855.8	0.247187	855.8	0.141779	855.8	0.0898679	855.8	0.0601966
856	0.38975	856	0.243283	856	0.14268	856	0.0829426	856	0.0536126
856.2	0.396257	856.2	0.249121	856.2	0.13641	856.2	0.0891268	856.2	0.0514472
856.4	0.394602	856.4	0.24846	856.4	0.137317	856.4	0.0849441	856.4	0.0565862
856.6	0.393615	856.6	0.249425	856.6	0.136485	856.6	0.0835639	856.6	0.0545762
856.8	0.39198	856.8	0.250661	856.8	0.140145	856.8	0.0831504	856.8	0.0533119
857	0.397789	857	0.24724	857	0.144994	857	0.0862757	857	0.0567895
857.2	0.392079	857.2	0.250165	857.2	0.143916	857.2	0.0842334	857.2	0.0535321
857.4	0.393594	857.4	0.244403	857.4	0.141393	857.4	0.0840106	857.4	0.0583486
857.6	0.396738	857.6	0.249606	857.6	0.141663	857.6	0.0886709	857.6	0.0580881
857.8	0.394755	857.8	0.247877	857.8	0.136094	857.8	0.0870406	857.8	0.0584371
858	0.392207	858	0.249553	858	0.13821	858	0.088168	858	0.0559836
858.2	0.397929	858.2	0.249243	858.2	0.138518	858.2	0.090106	858.2	0.0557354
858.4	0.399119	858.4	0.246837	858.4	0.143384	858.4	0.0849436	858.4	0.0585798
858.6	0.39412	858.6	0.25476	858.6	0.143732	858.6	0.0857317	858.6	0.0538756
858.8	0.3995	858.8	0.249489	858.8	0.143327	858.8	0.0889209	858.8	0.0551934
859	0.393174	859	0.247607	859	0.144454	859	0.0894276	859	0.0561024
859.2	0.400542	859.2	0.249531	859.2	0.141365	859.2	0.0860018	859.2	0.0542229
859.4	0.397465	859.4	0.248737	859.4	0.142604	859.4	0.0870799	859.4	0.0570917
859.6	0.400222	859.6	0.252562	859.6	0.139727	859.6	0.0886345	859.6	0.0594961
859.8	0.395876	859.8	0.249709	859.8	0.139173	859.8	0.0842934	859.8	0.0606196
860	0.395885	860	0.254481	860	0.141613	860	0.0846188	860	0.0576929
860.2	0.396389	860.2	0.252604	860.2	0.140432	860.2	0.0860286	860.2	0.059082
860.4	0.39807	860.4	0.249852	860.4	0.144795	860.4	0.0848687	860.4	0.0587219
860.6	0.401244	860.6	0.250947	860.6	0.137572	860.6	0.0919493	860.6	0.0549085
860.8	0.394075	860.8	0.255001	860.8	0.143545	860.8	0.0876777	860.8	0.0577429
861	0.400004	861	0.255261	861	0.141562	861	0.0863244	861	0.0570993
861.2	0.395565	861.2	0.251972	861.2	0.146456	861.2	0.0871818	861.2	0.052664
861.4	0.398919	861.4	0.25082	861.4	0.144071	861.4	0.0912563	861.4	0.0550475
861.6	0.400623	861.6	0.2497	861.6	0.148121	861.6	0.0865844	861.6	0.0539037
861.8	0.399676	861.8	0.252306	861.8	0.137826	861.8	0.0868445	861.8	0.05716
862	0.400013	862	0.254407	862	0.143901	862	0.0848539	862	0.053696
862.2	0.402632	862.2	0.253656	862.2	0.146178	862.2	0.0861776	862.2	0.056839
862.4	0.402047	862.4	0.250556	862.4	0.142149	862.4	0.0910296	862.4	0.0534749
862.6	0.406707	862.6	0.251531	862.6	0.142731	862.6	0.0882651	862.6	0.0584563
862.8	0.400353	862.8	0.250822	862.8	0.146685	862.8	0.0900171	862.8	0.0575328
863	0.401734	863	0.252375	863	0.14473	863	0.0889035	863	0.0553663
863.2	0.400486	863.2	0.249754	863.2	0.14267	863.2	0.0898026	863.2	0.0561837
863.4	0.40122	863.4	0.252944	863.4	0.142275	863.4	0.0856985	863.4	0.0593245
863.6	0.402315	863.6	0.253937	863.6	0.143684	863.6	0.0853026	863.6	0.0562796
863.8	0.401972	863.8	0.251395	863.8	0.145333	863.8	0.0845477	863.8	0.0558227
864	0.397576	864	0.252569	864	0.14545	864	0.0854026	864	0.0613405
864.2	0.403368	864.2	0.250533	864.2	0.145003	864.2	0.0889162	864.2	0.0586445
864.4	0.404665	864.4	0.250719	864.4	0.138336	864.4	0.0892848	864.4	0.0568121
864.6	0.398048	864.6	0.257051	864.6	0.143978	864.6	0.0889397	864.6	0.056847
864.8	0.405934	864.8	0.254499	864.8	0.143887	864.8	0.0884512	864.8	0.057684
865	0.401367	865	0.255158	865	0.143852	865	0.0889144	865	0.0557665
865.2	0.403992	865.2	0.250098	865.2	0.144202	865.2	0.0873891	865.2	0.0624282
865.4	0.405351	865.4	0.256699	865.4	0.146905	865.4	0.0890754	865.4	0.056813
865.6	0.400819	865.6	0.254506	865.6	0.144822	865.6	0.0912085	865.6	0.0570807
865.8	0.40002	865.8	0.25485	865.8	0.140356	865.8	0.0930011	865.8	0.0559851
866	0.404038	866	0.253891	866	0.144563	866	0.0864952	866	0.060074
866.2	0.402824	866.2	0.256564	866.2	0.143674	866.2	0.0852512	866.2	0.0616972
866.4	0.399825	866.4	0.254209	866.4	0.144505	866.4	0.0901888	866.4	0.0539325
866.6	0.405277	866.6	0.256948	866.6	0.144895	866.6	0.0922034	866.6	0.0571757
866.8	0.406662	866.8	0.25294	866.8	0.142149	866.8	0.0891121	866.8	0.0520065
867	0.406508	867	0.257173	867	0.143849	867	0.0874569	867	0.060638
867.2	0.407672	867.2	0.253277	867.2	0.147048	867.2	0.0894636	867.2	0.0555747
867.4	0.404536	867.4	0.253949	867.4	0.145129	867.4	0.0897929	867.4	0.0578504
867.6	0.401675	867.6	0.255535	867.6	0.148897	867.6	0.0895075	867.6	0.0571559
867.8	0.407456	867.8	0.260762	867.8	0.147725	867.8	0.0888035	867.8	0.0578024
868	0.408025	868	0.255684	868	0.146547	868	0.0875308	868	0.0561097
868.2	0.409247	868.2	0.25796	868.2	0.14582	868.2	0.0921806	868.2	0.05908
868.4	0.405143	868.4	0.256826	868.4	0.14335	868.4	0.0894408	868.4	0.060084
868.6	0.406505	868.6	0.254319	868.6	0.145895	868.6	0.0948858	868.6	0.0522504
868.8	0.411969	868.8	0.254691	868.8	0.143844	868.8	0.0935182	868.8	0.057993
869	0.406919	869	0.260814	869	0.143414	869	0.0917854	869	0.0583368
869.2	0.404632	869.2	0.254505	869.2	0.144286	869.2	0.0889685	869.2	0.0568514
869.4	0.406765	869.4	0.255997	869.4	0.14599	869.4	0.089691	869.4	0.0573003
869.6	0.408819	869.6	0.255326	869.6	0.146476	869.6	0.0901743	869.6	0.0614346
869.8	0.405607	869.8	0.25734	869.8	0.147932	869.8	0.0890067	869.8	0.0563151
870	0.404571	870	0.259573	870	0.142049	870	0.0916728	870	0.0570043
870.2	0.406655	870.2	0.257824	870.2	0.143059	870.2	0.0901134	870.2	0.0584722
870.4	0.406701	870.4	0.260391	870.4	0.146335	870.4	0.0923851	870.4	0.05554
870.6	0.409082	870.6	0.257356	870.6	0.147352	870.6	0.0931823	870.6	0.0572718
870.8	0.406077	870.8	0.259216	870.8	0.144829	870.8	0.0902842	870.8	0.0552235
871	0.407848	871	0.258876	871	0.146419	871	0.0856502	871	0.0576682
871.2	0.409646	871.2	0.257909	871.2	0.141026	871.2	0.0883436	871.2	0.0547572
871.4	0.410289	871.4	0.258174	871.4	0.149575	871.4	0.0912173	871.4	0.0605388
871.6	0.407769	871.6	0.25932	871.6	0.145872	871.6	0.0931277	871.6	0.0602841
871.8	0.408547	871.8	0.263086	871.8	0.146789	871.8	0.0896047	871.8	0.0583834
872	0.410821	872	0.258022	872	0.143546	872	0.0906057	872	0.0527333
872.2	0.413915	872.2	0.25712	872.2	0.147074	872.2	0.0896915	872.2	0.0608115
872.4	0.411195	872.4	0.258519	872.4	0.150753	872.4	0.0940554	872.4	0.0594118
872.6	0.411631	872.6	0.257953	872.6	0.144267	872.6	0.0874838	872.6	0.0590485
872.8	0.405985	872.8	0.262211	872.8	0.145439	872.8	0.0898927	872.8	0.0625121
873	0.410472	873	0.2596	873	0.147632	873	0.08808	873	0.0558448
873.2	0.412955	873.2	0.256806	873.2	0.145809	873.2	0.0938799	873.2	0.0574252
873.4	0.413463	873.4	0.257918	873.4	0.146527	873.4	0.0898975	873.4	0.053767
873.6	0.412131	873.6	0.259096	873.6	0.147576	873.6	0.0885887	873.6	0.060637
873.8	0.412243	873.8	0.258142	873.8	0.145791	873.8	0.087458	873.8	0.0561901
874	0.409158	874	0.263893	874	0.146658	874	0.09039	874	0.0552782
874.2	0.408324	874.2	0.260813	874.2	0.146562	874.2	0.0961818	874.2	0.0594125
874.4	0.412303	874.4	0.259038	874.4	0.146347	874.4	0.0929635	874.4	0.0575982
874.6	0.409028	874.6	0.259303	874.6	0.151325	874.6	0.0948663	874.6	0.0579254
874.8	0.411835	874.8	0.26458	874.8	0.146311	874.8	0.0891228	874.8	0.0591563
875	0.412011	875	0.260546	875	0.150481	875	0.0884824	875	0.0601972
875.2	0.411325	875.2	0.257398	875.2	0.147519	875.2	0.094342	875.2	0.0576916
875.4	0.407549	875.4	0.259466	875.4	0.146971	875.4	0.0935243	875.4	0.0590837
875.6	0.413562	875.6	0.264673	875.6	0.145777	875.6	0.0880612	875.6	0.0580711
875.8	0.413316	875.8	0.259176	875.8	0.149063	875.8	0.0916563	875.8	0.0584507
876	0.410752	876	0.265366	876	0.147409	876	0.091512	876	0.0587007
876.2	0.416386	876.2	0.261903	876.2	0.150696	876.2	0.0938907	876.2	0.059739
876.4	0.414178	876.4	0.261583	876.4	0.145029	876.4	0.0944093	876.4	0.0595322
876.6	0.416846	876.6	0.263183	876.6	0.144326	876.6	0.0923709	876.6	0.0598206
876.8	0.41248	876.8	0.258533	876.8	0.14821	876.8	0.0898688	876.8	0.0567175
877	0.414908	877	0.265296	877	0.144383	877	0.0905373	877	0.0574044
877.2	0.413474	877.2	0.257481	877.2	0.14925	877.2	0.0891239	877.2	0.0580718
877.4	0.41344	877.4	0.26195	877.4	0.147635	877.4	0.0903325	877.4	0.0577268
877.6	0.415216	877.6	0.263952	877.6	0.151025	877.6	0.0883213	877.6	0.0564316
877.8	0.409886	877.8	0.263276	877.8	0.147502	877.8	0.0956569	877.8	0.0608176
878	0.416679	878	0.259861	878	0.151936	878	0.0919707	878	0.0585978
878.2	0.414584	878.2	0.260128	878.2	0.147281	878.2	0.0907444	878.2	0.0599035
878.4	0.413659	878.4	0.262848	878.4	0.149376	878.4	0.0929725	878.4	0.0601407
878.6	0.416634	878.6	0.264367	878.6	0.149259	878.6	0.0946332	878.6	0.0585299
878.8	0.419165	878.8	0.263675	878.8	0.15161	878.8	0.0922584	878.8	0.0609894
879	0.417112	879	0.263711	879	0.151031	879	0.0927096	879	0.0588051
879.2	0.418126	879.2	0.269928	879.2	0.149279	879.2	0.095372	879.2	0.0576692
879.4	0.416601	879.4	0.264566	879.4	0.148678	879.4	0.0927263	879.4	0.0567643
879.6	0.419271	879.6	0.264514	879.6	0.150947	879.6	0.0947136	879.6	0.0592031
879.8	0.422721	879.8	0.263823	879.8	0.149109	879.8	0.0974181	879.8	0.0605177
880	0.416125	880	0.260771	880	0.152003	880	0.0876966	880	0.0587242
880.2	0.417273	880.2	0.265095	880.2	0.149419	880.2	0.0912922	880.2	0.0582508
880.4	0.417928	880.4	0.26295	880.4	0.150474	880.4	0.0920633	880.4	0.0549435
880.6	0.41822	880.6	0.264366	880.6	0.151222	880.6	0.0975	880.6	0.0598649
880.8	0.415843	880.8	0.262733	880.8	0.148203	880.8	0.0947899	880.8	0.0602464
881	0.419055	881	0.261494	881	0.14705	881	0.0918417	881	0.0630977
881.2	0.416739	881.2	0.264841	881.2	0.149513	881.2	0.0888821	881.2	0.0627837
881.4	0.418478	881.4	0.266895	881.4	0.15038	881.4	0.0922238	881.4	0.0563003
881.6	0.422996	881.6	0.263484	881.6	0.143886	881.6	0.0951152	881.6	0.0595757
881.8	0.422406	881.8	0.264195	881.8	0.152445	881.8	0.0986502	881.8	0.0571159
882	0.416286	882	0.267202	882	0.145436	882	0.0896706	882	0.0634191
882.2	0.420002	882.2	0.267521	882.2	0.151086	882.2	0.0914747	882.2	0.0583628
882.4	0.419264	882.4	0.26713	882.4	0.149861	882.4	0.0921361	882.4	0.0612489
882.6	0.42036	882.6	0.266824	882.6	0.149807	882.6	0.0907231	882.6	0.059815
882.8	0.424369	882.8	0.262084	882.8	0.148431	882.8	0.0925372	882.8	0.059397
883	0.418884	883	0.268462	883	0.151231	883	0.0919508	883	0.0587444
883.2	0.421954	883.2	0.26689	883.2	0.15014	883.2	0.0912028	883.2	0.0598239
883.4	0.422559	883.4	0.267328	883.4	0.148703	883.4	0.0971456	883.4	0.0593021
883.6	0.419445	883.6	0.26493	883.6	0.15017	883.6	0.0943768	883.6	0.0588434
883.8	0.421554	883.8	0.268311	883.8	0.150335	883.8	0.0930092	883.8	0.0633064
884	0.418586	884	0.265558	884	0.154708	884	0.0959393	884	0.0607491
884.2	0.420137	884.2	0.266016	884.2	0.151853	884.2	0.0930248	884.2	0.0612227
884.4	0.426406	884.4	0.265068	884.4	0.152398	884.4	0.0959735	884.4	0.0603298
884.6	0.42604	884.6	0.266676	884.6	0.154431	884.6	0.0944206	884.6	0.0597297
884.8	0.425977	884.8	0.269473	884.8	0.151985	884.8	0.0962844	884.8	0.0621037
885	0.420899	885	0.267722	885	0.149307	885	0.0954395	885	0.0628862
885.2	0.425324	885.2	0.266219	885.2	0.152995	885.2	0.0952436	885.2	0.0599727
885.4	0.420191	885.4	0.268967	885.4	0.148407	885.4	0.0926838	885.4	0.0600673
885.6	0.424982	885.6	0.269315	885.6	0.15144	885.6	0.0905495	885.6	0.0588303
885.8	0.421968	885.8	0.267625	885.8	0.15093	885.8	0.0939195	885.8	0.0573267
886	0.423689	886	0.266628	886	0.152596	886	0.0944081	886	0.060658
886.2	0.424498	886.2	0.269185	886.2	0.150117	886.2	0.094058	886.2	0.0587087
886.4	0.425523	886.4	0.264877	886.4	0.1516	886.4	0.0923515	886.4	0.0602811
886.6	0.426191	886.6	0.270947	886.6	0.151342	886.6	0.0936246	886.6	0.0570442
886.8	0.425468	886.8	0.269727	886.8	0.152871	886.8	0.0938324	886.8	0.0642655
887	0.42819	887	0.265987	887	0.15412	887	0.0907193	887	0.0602045
887.2	0.424243	887.2	0.269612	887.2	0.150656	887.2	0.0974723	887.2	0.0541162
887.4	0.425856	887.4	0.267426	887.4	0.152139	887.4	0.0953425	887.4	0.0603088
887.6	0.423206	887.6	0.268858	887.6	0.155339	887.6	0.0913035	887.6	0.0608908
887.8	0.424838	887.8	0.265235	887.8	0.153791	887.8	0.0940487	887.8	0.0591509
888	0.427829	888	0.269197	888	0.150848	888	0.0967878	888	0.0626888
888.2	0.421209	888.2	0.269665	888.2	0.150256	888.2	0.0941813	888.2	0.0619056
888.4	0.425821	888.4	0.272001	888.4	0.150609	888.4	0.092188	888.4	0.0603168
888.6	0.427115	888.6	0.270165	888.6	0.156125	888.6	0.0963974	888.6	0.0596676
888.8	0.425676	888.8	0.27094	888.8	0.152434	888.8	0.095715	888.8	0.06069
889	0.422392	889	0.269055	889	0.152698	889	0.093439	889	0.0598455
889.2	0.425814	889.2	0.272156	889.2	0.154541	889.2	0.100786	889.2	0.0631163
889.4	0.425691	889.4	0.272806	889.4	0.155092	889.4	0.0970975	889.4	0.0620492
889.6	0.430538	889.6	0.2685	889.6	0.151843	889.6	0.0957375	889.6	0.0607138
889.8	0.427246	889.8	0.272891	889.8	0.153048	889.8	0.0991721	889.8	0.0642725
890	0.424454	890	0.271214	890	0.152928	890	0.0928876	890	0.0633475
890.2	0.427332	890.2	0.269706	890.2	0.154291	890.2	0.0987411	890.2	0.0608696
890.4	0.429589	890.4	0.272168	890.4	0.152809	890.4	0.097306	890.4	0.0584908
890.6	0.432531	890.6	0.274182	890.6	0.153735	890.6	0.0936242	890.6	0.0626582
890.8	0.432262	890.8	0.272204	890.8	0.148837	890.8	0.0918101	890.8	0.0583345
891	0.42867	891	0.27427	891	0.150347	891	0.0962934	891	0.0598315
891.2	0.427755	891.2	0.271605	891.2	0.154099	891.2	0.0949852	891.2	0.0597325
891.4	0.429499	891.4	0.272791	891.4	0.149653	891.4	0.0909343	891.4	0.0618893
891.6	0.429717	891.6	0.2694	891.6	0.152556	891.6	0.0938537	891.6	0.0614745
891.8	0.430232	891.8	0.2703	891.8	0.15874	891.8	0.0962246	891.8	0.0598856
892	0.430339	892	0.272678	892	0.153366	892	0.0941932	892	0.0598866
892.2	0.429148	892.2	0.273088	892.2	0.153247	892.2	0.0989574	892.2	0.0612345
892.4	0.434928	892.4	0.272577	892.4	0.153912	892.4	0.0978016	892.4	0.0623659
892.6	0.429131	892.6	0.269831	892.6	0.15085	892.6	0.0944707	892.6	0.0577692
892.8	0.430608	892.8	0.277313	892.8	0.15568	892.8	0.0946984	892.8	0.0624394
893	0.433236	893	0.271529	893	0.153438	893	0.096713	893	0.0599019
893.2	0.433864	893.2	0.274569	893.2	0.151826	893.2	0.0955984	893.2	0.0610028
893.4	0.429363	893.4	0.274628	893.4	0.156594	893.4	0.0936472	893.4	0.0588052
893.6	0.4331	893.6	0.27303	893.6	0.155223	893.6	0.0940363	893.6	0.061744
893.8	0.430795	893.8	0.271981	893.8	0.154904	893.8	0.0975113	893.8	0.0597911
894	0.433304	894	0.274265	894	0.15678	894	0.0962695	894	0.0598287
894.2	0.430545	894.2	0.270846	894.2	0.153316	894.2	0.0969171	894.2	0.0638575
894.4	0.433258	894.4	0.270241	894.4	0.157982	894.4	0.0921799	894.4	0.0571071
894.6	0.436995	894.6	0.271433	894.6	0.153232	894.6	0.0968953	894.6	0.0596059
894.8	0.435273	894.8	0.274023	894.8	0.151254	894.8	0.0953791	894.8	0.0626404
895	0.434	895	0.274172	895	0.157892	895	0.0997539	895	0.0617218
895.2	0.437062	895.2	0.268719	895.2	0.153086	895.2	0.0977263	895.2	0.0600917
895.4	0.43518	895.4	0.274478	895.4	0.153692	895.4	0.0959432	895.4	0.0591328
895.6	0.432581	895.6	0.274242	895.6	0.154904	895.6	0.0951111	895.6	0.0625711
895.8	0.435751	895.8	0.274735	895.8	0.158127	895.8	0.0977413	895.8	0.0597488
896	0.43641	896	0.274833	896	0.152557	896	0.0964089	896	0.0632015
896.2	0.432837	896.2	0.275256	896.2	0.153523	896.2	0.0963332	896.2	0.0591305
896.4	0.435052	896.4	0.273629	896.4	0.157888	896.4	0.100025	896.4	0.0597232
896.6	0.432707	896.6	0.275133	896.6	0.152853	896.6	0.097355	896.6	0.0614182
896.8	0.439605	896.8	0.275383	896.8	0.158629	896.8	0.0950456	896.8	0.060002
897	0.43604	897	0.279546	897	0.155011	897	0.100035	897	0.0647197
897.2	0.435806	897.2	0.273851	897.2	0.159766	897.2	0.0983575	897.2	0.0587684
897.4	0.436212	897.4	0.278728	897.4	0.15475	897.4	0.0962439	897.4	0.0665691
897.6	0.435282	897.6	0.27535	897.6	0.157708	897.6	0.0962189	897.6	0.0647996
897.8	0.436844	897.8	0.277443	897.8	0.156943	897.8	0.0981483	897.8	0.0606355
898	0.435366	898	0.278159	898	0.154692	898	0.0963797	898	0.0621284
898.2	0.439789	898.2	0.276609	898.2	0.156412	898.2	0.0989055	898.2	0.0622482
898.4	0.437054	898.4	0.275539	898.4	0.154367	898.4	0.100013	898.4	0.0610379
898.6	0.436484	898.6	0.276005	898.6	0.157032	898.6	0.0977486	898.6	0.0628932
898.8	0.438544	898.8	0.277668	898.8	0.157551	898.8	0.0993703	898.8	0.0643744
899	0.436475	899	0.274859	899	0.156453	899	0.095881	899	0.0589933
899.2	0.437359	899.2	0.276675	899.2	0.155914	899.2	0.0983957	899.2	0.0629747
899.4	0.435589	899.4	0.276193	899.4	0.15568	899.4	0.0974833	899.4	0.0618687
899.6	0.438311	899.6	0.276167	899.6	0.155907	899.6	0.0951765	899.6	0.0611345
899.8	0.440931	899.8	0.275565	899.8	0.157448	899.8	0.096704	899.8	0.0620575
900	0.436286	900	0.277336	900	0.155424	900	0.0961613	900	0.0628252
900.2	0.437997	900.2	0.273793	900.2	0.160226	900.2	0.0969823	900.2	0.0655012
900.4	0.440454	900.4	0.279846	900.4	0.157255	900.4	0.101361	900.4	0.0622088
900.6	0.438732	900.6	0.281385	900.6	0.154065	900.6	0.0996673	900.6	0.0628754
900.8	0.441871	900.8	0.277285	900.8	0.158673	900.8	0.0991182	900.8	0.0645287
901	0.44101	901	0.275089	901	0.158154	901	0.102523	901	0.0599325
901.2	0.443768	901.2	0.278675	901.2	0.152142	901.2	0.0964772	901.2	0.0614673
901.4	0.440518	901.4	0.276944	901.4	0.157267	901.4	0.101287	901.4	0.0587996
901.6	0.437351	901.6	0.275319	901.6	0.158028	901.6	0.0978044	901.6	0.0660199
901.8	0.440518	901.8	0.276554	901.8	0.162955	901.8	0.0987904	901.8	0.0643422
902	0.441678	902	0.280306	902	0.156728	902	0.0992514	902	0.0614294
902.2	0.439206	902.2	0.280695	902.2	0.160187	902.2	0.0982067	902.2	0.0635285
902.4	0.437646	902.4	0.281154	902.4	0.159386	902.4	0.0949642	902.4	0.0618123
902.6	0.438964	902.6	0.278242	902.6	0.157114	902.6	0.100258	902.6	0.0643953
902.8	0.440826	902.8	0.279678	902.8	0.160826	902.8	0.099844	902.8	0.0631772
903	0.441105	903	0.279889	903	0.159361	903	0.0990065	903	0.0631022
903.2	0.442906	903.2	0.280933	903.2	0.157297	903.2	0.0988688	903.2	0.0639586
903.4	0.44041	903.4	0.277854	903.4	0.16088	903.4	0.0928693	903.4	0.0610394
903.6	0.441588	903.6	0.28378	903.6	0.159492	903.6	0.102469	903.6	0.0580598
903.8	0.447053	903.8	0.279914	903.8	0.160146	903.8	0.0950882	903.8	0.0636314
904	0.444015	904	0.280882	904	0.159103	904	0.0968038	904	0.0621924
904.2	0.441889	904.2	0.281912	904.2	0.160727	904.2	0.0988636	904.2	0.058372
904.4	0.441077	904.4	0.281789	904.4	0.157896	904.4	0.0999071	904.4	0.0634482
904.6	0.443306	904.6	0.279783	904.6	0.15668	904.6	0.0979551	904.6	0.0640904
904.8	0.445226	904.8	0.280542	904.8	0.154797	904.8	0.100506	904.8	0.0664911
905	0.443121	905	0.279819	905	0.157132	905	0.0984776	905	0.0628982
905.2	0.442286	905.2	0.282272	905.2	0.160454	905.2	0.100334	905.2	0.0585599
905.4	0.444828	905.4	0.279521	905.4	0.157224	905.4	0.0990987	905.4	0.0640134
905.6	0.441084	905.6	0.282869	905.6	0.159843	905.6	0.100124	905.6	0.0615037
905.8	0.442237	905.8	0.279159	905.8	0.157511	905.8	0.0985567	905.8	0.0611117
906	0.445839	906	0.283199	906	0.159847	906	0.100105	906	0.0614335
906.2	0.445766	906.2	0.283093	906.2	0.157191	906.2	0.101807	906.2	0.0643296
906.4	0.444737	906.4	0.278249	906.4	0.163921	906.4	0.0999955	906.4	0.060507
906.6	0.444602	906.6	0.280214	906.6	0.162534	906.6	0.0965748	906.6	0.0662768
906.8	0.447897	906.8	0.279962	906.8	0.161486	906.8	0.0969101	906.8	0.0653786
907	0.442643	907	0.280854	907	0.159382	907	0.0993905	907	0.0637221
907.2	0.444214	907.2	0.279875	907.2	0.159244	907.2	0.103402	907.2	0.0637373
907.4	0.447173	907.4	0.281758	907.4	0.154973	907.4	0.0976537	907.4	0.0648278
907.6	0.441648	907.6	0.280138	907.6	0.161069	907.6	0.0986539	907.6	0.0644465
907.8	0.445319	907.8	0.282372	907.8	0.157583	907.8	0.101884	907.8	0.062703
908	0.444469	908	0.277494	908	0.161056	908	0.0974935	908	0.063793
908.2	0.447662	908.2	0.281383	908.2	0.163591	908.2	0.10158	908.2	0.0650309
908.4	0.445952	908.4	0.281698	908.4	0.162284	908.4	0.101265	908.4	0.0623634
908.6	0.445007	908.6	0.278444	908.6	0.159468	908.6	0.100517	908.6	0.0645974
908.8	0.450079	908.8	0.282006	908.8	0.160607	908.8	0.0950981	908.8	0.0626909
909	0.44758	909	0.283171	909	0.162499	909	0.100954	909	0.0658515
909.2	0.448764	909.2	0.281582	909.2	0.160731	909.2	0.0996938	909.2	0.0630554
909.4	0.448084	909.4	0.283636	909.4	0.159049	909.4	0.100102	909.4	0.0625873
909.6	0.448569	909.6	0.281633	909.6	0.154433	909.6	0.0990413	909.6	0.0605944
909.8	0.446945	909.8	0.284898	909.8	0.160496	909.8	0.097104	909.8	0.0608494
910	0.451101	910	0.282097	910	0.163264	910	0.0989746	910	0.0636986
910.2	0.445166	910.2	0.283192	910.2	0.160972	910.2	0.0995709	910.2	0.0667792
910.4	0.446787	910.4	0.282448	910.4	0.159843	910.4	0.0972261	910.4	0.0609021
910.6	0.448423	910.6	0.281552	910.6	0.161041	910.6	0.103886	910.6	0.0610168
910.8	0.452721	910.8	0.282103	910.8	0.157721	910.8	0.0999743	910.8	0.0679413
911	0.443863	911	0.282304	911	0.160042	911	0.0981341	911	0.0659623
911.2	0.448245	911.2	0.282123	911.2	0.159266	911.2	0.0979905	911.2	0.0647297
911.4	0.446733	911.4	0.286155	911.4	0.161966	911.4	0.102314	911.4	0.0650265
911.6	0.44799	911.6	0.284926	911.6	0.159022	911.6	0.0986179	911.6	0.0640599
911.8	0.447362	911.8	0.285471	911.8	0.157844	911.8	0.0986213	911.8	0.0677745
912	0.45038	912	0.287121	912	0.159976	912	0.0990542	912	0.0682722
912.2	0.452126	912.2	0.281525	912.2	0.160588	912.2	0.101886	912.2	0.0640561
912.4	0.451154	912.4	0.283031	912.4	0.162913	912.4	0.101314	912.4	0.0645099
912.6	0.447234	912.6	0.284712	912.6	0.1605	912.6	0.0984237	912.6	0.0669955
912.8	0.450747	912.8	0.283618	912.8	0.163392	912.8	0.0996855	912.8	0.0640247
913	0.449982	913	0.283742	913	0.16	913	0.100387	913	0.065165
913.2	0.450788	913.2	0.283402	913.2	0.164258	913.2	0.099551	913.2	0.0631573
913.4	0.451667	913.4	0.281019	913.4	0.162347	913.4	0.0993698	913.4	0.0615574
913.6	0.451275	913.6	0.281916	913.6	0.165876	913.6	0.0973953	913.6	0.0613721
913.8	0.452866	913.8	0.285239	913.8	0.16098	913.8	0.101562	913.8	0.0610028
914	0.450293	914	0.286178	914	0.159931	914	0.102874	914	0.0655438
914.2	0.451496	914.2	0.282319	914.2	0.161847	914.2	0.0983863	914.2	0.0663299
914.4	0.452083	914.4	0.286081	914.4	0.164266	914.4	0.099577	914.4	0.0674391
914.6	0.450766	914.6	0.288828	914.6	0.166748	914.6	0.102046	914.6	0.0626089
914.8	0.449291	914.8	0.288765	914.8	0.159992	914.8	0.100739	914.8	0.0652751
915	0.455685	915	0.284397	915	0.16172	915	0.101063	915	0.0672723
915.2	0.45591	915.2	0.282833	915.2	0.164223	915.2	0.100478	915.2	0.0635352
915.4	0.45309	915.4	0.291444	915.4	0.163284	915.4	0.102886	915.4	0.065684
915.6	0.450528	915.6	0.286543	915.6	0.161899	915.6	0.102097	915.6	0.0654493
915.8	0.451569	915.8	0.28616	915.8	0.161511	915.8	0.102471	915.8	0.0648716
916	0.459112	916	0.286769	916	0.162103	916	0.0992166	916	0.0629019
916.2	0.457565	916.2	0.288399	916.2	0.159466	916.2	0.101291	916.2	0.0647284
916.4	0.453853	916.4	0.287155	916.4	0.163379	916.4	0.102523	916.4	0.0637544
916.6	0.455865	916.6	0.287915	916.6	0.161144	916.6	0.101855	916.6	0.0666002
916.8	0.454974	916.8	0.290424	916.8	0.161021	916.8	0.101743	916.8	0.0655478
917	0.452086	917	0.284613	917	0.159816	917	0.101876	917	0.0593327
917.2	0.456155	917.2	0.288324	917.2	0.163799	917.2	0.0987982	917.2	0.06594
917.4	0.455674	917.4	0.284269	917.4	0.164085	917.4	0.0982395	917.4	0.0649618
917.6	0.454776	917.6	0.285211	917.6	0.163476	917.6	0.102849	917.6	0.0635489
917.8	0.452413	917.8	0.292284	917.8	0.16217	917.8	0.104423	917.8	0.0639187
918	0.455036	918	0.290981	918	0.163135	918	0.10028	918	0.0630741
918.2	0.456369	918.2	0.286904	918.2	0.165494	918.2	0.101414	918.2	0.0636267
918.4	0.456177	918.4	0.288899	918.4	0.164477	918.4	0.10195	918.4	0.0643489
918.6	0.454967	918.6	0.288883	918.6	0.162491	918.6	0.100506	918.6	0.0662111
918.8	0.456543	918.8	0.28919	918.8	0.164362	918.8	0.102491	918.8	0.0667206
919	0.459336	919	0.285853	919	0.162895	919	0.103473	919	0.0679395
919.2	0.458325	919.2	0.289555	919.2	0.160585	919.2	0.101979	919.2	0.0655887
919.4	0.46031	919.4	0.291362	919.4	0.165761	919.4	0.106049	919.4	0.0610646
919.6	0.455148	919.6	0.292932	919.6	0.160726	919.6	0.10039	919.6	0.0642909
919.8	0.454025	919.8	0.290898	919.8	0.164676	919.8	0.0979167	919.8	0.0660638
920	0.457703	920	0.286929	920	0.163331	920	0.097882	920	0.0639799
920.2	0.456659	920.2	0.288949	920.2	0.161633	920.2	0.104216	920.2	0.0679089
920.4	0.455824	920.4	0.290195	920.4	0.165371	920.4	0.104269	920.4	0.0641595
920.6	0.459858	920.6	0.289332	920.6	0.165878	920.6	0.0993901	920.6	0.0639
920.8	0.458298	920.8	0.288974	920.8	0.165824	920.8	0.102766	920.8	0.0684094
921	0.455957	921	0.290513	921	0.166157	921	0.10196	921	0.0662416
921.2	0.456538	921.2	0.289813	921.2	0.167398	921.2	0.10019	921.2	0.0648856
921.4	0.46131	921.4	0.293832	921.4	0.159315	921.4	0.103776	921.4	0.0634534
921.6	0.45983	921.6	0.291989	921.6	0.164683	921.6	0.102819	921.6	0.0640296
921.8	0.456946	921.8	0.291583	921.8	0.165231	921.8	0.101489	921.8	0.0603576
922	0.462241	922	0.293276	922	0.167948	922	0.105266	922	0.0656532
922.2	0.459766	922.2	0.289297	922.2	0.165546	922.2	0.100304	922.2	0.0660109
922.4	0.459088	922.4	0.292904	922.4	0.163049	922.4	0.101152	922.4	0.0669817
922.6	0.457629	922.6	0.290239	922.6	0.16524	922.6	0.103458	922.6	0.0648006
922.8	0.460773	922.8	0.295577	922.8	0.165489	922.8	0.103138	922.8	0.0704884
923	0.46092	923	0.294237	923	0.165032	923	0.100626	923	0.06226
923.2	0.459675	923.2	0.290792	923.2	0.165174	923.2	0.104255	923.2	0.0662606
923.4	0.459416	923.4	0.291406	923.4	0.163477	923.4	0.105031	923.4	0.0648552
923.6	0.455765	923.6	0.289703	923.6	0.162055	923.6	0.103867	923.6	0.0672425
923.8	0.460592	923.8	0.293268	923.8	0.166149	923.8	0.102652	923.8	0.067248
924	0.461296	924	0.291893	924	0.163436	924	0.102767	924	0.0682776
924.2	0.462534	924.2	0.294165	924.2	0.169568	924.2	0.104654	924.2	0.0649258
924.4	0.461617	924.4	0.292523	924.4	0.164033	924.4	0.1033	924.4	0.0641867
924.6	0.461924	924.6	0.294656	924.6	0.16489	924.6	0.103737	924.6	0.0623487
924.8	0.46142	924.8	0.291762	924.8	0.162875	924.8	0.0993546	924.8	0.0628403
925	0.464845	925	0.294399	925	0.16636	925	0.101061	925	0.0653261
925.2	0.465298	925.2	0.291071	925.2	0.166516	925.2	0.103552	925.2	0.0656547
925.4	0.461352	925.4	0.292727	925.4	0.167421	925.4	0.10441	925.4	0.0698238
925.6	0.458048	925.6	0.289821	925.6	0.167279	925.6	0.100544	925.6	0.0628738
925.8	0.458673	925.8	0.289168	925.8	0.164816	925.8	0.106053	925.8	0.0645551
926	0.466337	926	0.290493	926	0.166635	926	0.101706	926	0.0673227
926.2	0.46083	926.2	0.291679	926.2	0.166873	926.2	0.100373	926.2	0.0643859
926.4	0.462562	926.4	0.295061	926.4	0.165218	926.4	0.102785	926.4	0.065162
926.6	0.461675	926.6	0.295359	926.6	0.16367	926.6	0.106489	926.6	0.0669316
926.8	0.465483	926.8	0.297663	926.8	0.166333	926.8	0.106564	926.8	0.0682001
927	0.467289	927	0.293687	927	0.168924	927	0.0992292	927	0.0664736
927.2	0.464478	927.2	0.291751	927.2	0.168005	927.2	0.106045	927.2	0.0687769
927.4	0.462097	927.4	0.293852	927.4	0.165328	927.4	0.104731	927.4	0.0654604
927.6	0.462012	927.6	0.297668	927.6	0.164355	927.6	0.102113	927.6	0.0690765
927.8	0.465701	927.8	0.292295	927.8	0.16855	927.8	0.101202	927.8	0.0695679
928	0.46376	928	0.293237	928	0.162627	928	0.101432	928	0.0687685
928.2	0.466816	928.2	0.292377	928.2	0.166902	928.2	0.102364	928.2	0.0654422
928.4	0.46451	928.4	0.297026	928.4	0.16893	928.4	0.101181	928.4	0.0648685
928.6	0.462635	928.6	0.294983	928.6	0.167408	928.6	0.102963	928.6	0.0605545
928.8	0.464129	928.8	0.293344	928.8	0.167811	928.8	0.103602	928.8	0.0668148
929	0.467344	929	0.295808	929	0.166863	929	0.1035	929	0.0673329
929.2	0.466983	929.2	0.298882	929.2	0.163658	929.2	0.100517	929.2	0.0724711
929.4	0.463558	929.4	0.299747	929.4	0.162987	929.4	0.105863	929.4	0.0684687
929.6	0.472235	929.6	0.291939	929.6	0.167156	929.6	0.102542	929.6	0.0651907
929.8	0.46844	929.8	0.294436	929.8	0.168962	929.8	0.103176	929.8	0.0679316
930	0.467097	930	0.297149	930	0.168437	930	0.104026	930	0.0635221
930.2	0.469279	930.2	0.29605	930.2	0.169223	930.2	0.102896	930.2	0.0684303
930.4	0.46664	930.4	0.293855	930.4	0.171611	930.4	0.104519	930.4	0.0661122
930.6	0.467779	930.6	0.293525	930.6	0.167769	930.6	0.104143	930.6	0.0686409
930.8	0.467028	930.8	0.293629	930.8	0.166422	930.8	0.106921	930.8	0.0666605
931	0.466079	931	0.294145	931	0.166915	931	0.108147	931	0.0654466
931.2	0.468806	931.2	0.29823	931.2	0.170343	931.2	0.106626	931.2	0.0701455
931.4	0.469141	931.4	0.293271	931.4	0.170241	931.4	0.108255	931.4	0.0655211
931.6	0.465373	931.6	0.297202	931.6	0.168552	931.6	0.10535	931.6	0.0651167
931.8	0.470319	931.8	0.295377	931.8	0.169593	931.8	0.104431	931.8	0.0684197
932	0.46708	932	0.295034	932	0.169746	932	0.106798	932	0.0643848
932.2	0.469336	932.2	0.293964	932.2	0.167924	932.2	0.103859	932.2	0.0671163
932.4	0.466922	932.4	0.296761	932.4	0.165953	932.4	0.105987	932.4	0.0676778
932.6	0.470616	932.6	0.295554	932.6	0.167314	932.6	0.104414	932.6	0.0661106
932.8	0.473709	932.8	0.298056	932.8	0.170272	932.8	0.105153	932.8	0.067834
933	0.47314	933	0.298524	933	0.167296	933	0.104456	933	0.0717932
933.2	0.467494	933.2	0.299276	933.2	0.168611	933.2	0.0995607	933.2	0.0664249
933.4	0.473595	933.4	0.301471	933.4	0.16499	933.4	0.0997117	933.4	0.0638763
933.6	0.471479	933.6	0.298524	933.6	0.170951	933.6	0.105636	933.6	0.0635601
933.8	0.471978	933.8	0.297088	933.8	0.168416	933.8	0.10623	933.8	0.0657382
934	0.468122	934	0.298105	934	0.171355	934	0.104923	934	0.0651773
934.2	0.470606	934.2	0.301337	934.2	0.16882	934.2	0.107699	934.2	0.0711373
934.4	0.472551	934.4	0.301968	934.4	0.167941	934.4	0.10319	934.4	0.0663159
934.6	0.475873	934.6	0.296237	934.6	0.166819	934.6	0.107105	934.6	0.0687251
934.8	0.472669	934.8	0.300908	934.8	0.171157	934.8	0.10953	934.8	0.0680326
935	0.472352	935	0.294965	935	0.167006	935	0.109867	935	0.0678745
935.2	0.474828	935.2	0.300535	935.2	0.167028	935.2	0.109278	935.2	0.0667369
935.4	0.469488	935.4	0.297487	935.4	0.171155	935.4	0.105308	935.4	0.0684588
935.6	0.473884	935.6	0.299132	935.6	0.170558	935.6	0.106727	935.6	0.0677442
935.8	0.470786	935.8	0.298136	935.8	0.170637	935.8	0.106965	935.8	0.0645325
936	0.473927	936	0.302595	936	0.169589	936	0.109457	936	0.0663844
936.2	0.471779	936.2	0.300831	936.2	0.173547	936.2	0.106499	936.2	0.0666374
936.4	0.470073	936.4	0.297063	936.4	0.172025	936.4	0.104399	936.4	0.0685407
936.6	0.472565	936.6	0.302528	936.6	0.170841	936.6	0.105821	936.6	0.0695222
936.8	0.471135	936.8	0.296389	936.8	0.168284	936.8	0.105346	936.8	0.0685484
937	0.472145	937	0.29778	937	0.170188	937	0.1076	937	0.0685157
937.2	0.474541	937.2	0.303466	937.2	0.170348	937.2	0.102153	937.2	0.0645798
937.4	0.473173	937.4	0.300615	937.4	0.169101	937.4	0.102817	937.4	0.0683737
937.6	0.475309	937.6	0.299795	937.6	0.174681	937.6	0.10814	937.6	0.0665783
937.8	0.47399	937.8	0.302508	937.8	0.168218	937.8	0.105718	937.8	0.0672662
938	0.475557	938	0.298437	938	0.175786	938	0.10645	938	0.0703152
938.2	0.477131	938.2	0.295894	938.2	0.168338	938.2	0.101667	938.2	0.0676006
938.4	0.477596	938.4	0.296515	938.4	0.171726	938.4	0.104695	938.4	0.068108
938.6	0.472827	938.6	0.302545	938.6	0.171934	938.6	0.107019	938.6	0.0669326
938.8	0.479809	938.8	0.299068	938.8	0.169203	938.8	0.105648	938.8	0.0714279
939	0.471518	939	0.302267	939	0.169889	939	0.103193	939	0.0662573
939.2	0.478785	939.2	0.301828	939.2	0.170718	939.2	0.103649	939.2	0.0705202
939.4	0.478578	939.4	0.299005	939.4	0.172633	939.4	0.104255	939.4	0.0687435
939.6	0.475973	939.6	0.299603	939.6	0.171475	939.6	0.106473	939.6	0.0669985
939.8	0.4769	939.8	0.304068	939.8	0.169316	939.8	0.104902	939.8	0.0689618
940	0.47841	940	0.297395	940	0.173963	940	0.107381	940	0.0684381
940.2	0.478656	940.2	0.303004	940.2	0.17037	940.2	0.107618	940.2	0.0701623
940.4	0.475372	940.4	0.298251	940.4	0.173123	940.4	0.10429	940.4	0.0677491
940.6	0.479724	940.6	0.302563	940.6	0.170998	940.6	0.108045	940.6	0.0675641
940.8	0.475612	940.8	0.303238	940.8	0.168409	940.8	0.103877	940.8	0.0654266
941	0.47936	941	0.298542	941	0.171603	941	0.107847	941	0.0708307
941.2	0.474844	941.2	0.303296	941.2	0.171278	941.2	0.106228	941.2	0.0661185
941.4	0.478936	941.4	0.3042	941.4	0.172482	941.4	0.104972	941.4	0.0677405
941.6	0.474355	941.6	0.302094	941.6	0.17266	941.6	0.107223	941.6	0.0700353
941.8	0.480415	941.8	0.300532	941.8	0.172766	941.8	0.105327	941.8	0.0703375
942	0.47932	942	0.299652	942	0.172108	942	0.107352	942	0.07086
942.2	0.479903	942.2	0.310279	942.2	0.173801	942.2	0.108189	942.2	0.0697814
942.4	0.475935	942.4	0.303711	942.4	0.172902	942.4	0.106649	942.4	0.0682063
942.6	0.480937	942.6	0.304118	942.6	0.174273	942.6	0.10851	942.6	0.0658808
942.8	0.480673	942.8	0.30353	942.8	0.168701	942.8	0.104479	942.8	0.0646588
943	0.477959	943	0.300578	943	0.170617	943	0.104725	943	0.0655188
943.2	0.478316	943.2	0.304176	943.2	0.174268	943.2	0.106161	943.2	0.0640966
943.4	0.477687	943.4	0.304237	943.4	0.167843	943.4	0.106355	943.4	0.0699022
943.6	0.482759	943.6	0.305175	943.6	0.171274	943.6	0.103319	943.6	0.0693466
943.8	0.480935	943.8	0.30281	943.8	0.170718	943.8	0.106999	943.8	0.0668733
944	0.483345	944	0.305665	944	0.171009	944	0.106218	944	0.0681299
944.2	0.482868	944.2	0.303083	944.2	0.170972	944.2	0.106955	944.2	0.0689855
944.4	0.479143	944.4	0.303462	944.4	0.173306	944.4	0.108228	944.4	0.0718518
944.6	0.486877	944.6	0.305179	944.6	0.17053	944.6	0.106388	944.6	0.0690161
944.8	0.482453	944.8	0.303694	944.8	0.171639	944.8	0.10948	944.8	0.0686782
945	0.478715	945	0.305027	945	0.173256	945	0.10971	945	0.0729044
945.2	0.482398	945.2	0.306233	945.2	0.171969	945.2	0.105762	945.2	0.0678209
945.4	0.481364	945.4	0.306011	945.4	0.172779	945.4	0.104961	945.4	0.0690338
945.6	0.481234	945.6	0.304084	945.6	0.174268	945.6	0.108103	945.6	0.0707647
945.8	0.478651	945.8	0.305916	945.8	0.173666	945.8	0.106734	945.8	0.070221
946	0.48245	946	0.310441	946	0.174996	946	0.107293	946	0.0702684
946.2	0.483186	946.2	0.31118	946.2	0.17546	946.2	0.108574	946.2	0.0689472
946.4	0.479742	946.4	0.303716	946.4	0.169818	946.4	0.111125	946.4	0.069136
946.6	0.480417	946.6	0.307539	946.6	0.170576	946.6	0.110437	946.6	0.0680379
946.8	0.485972	946.8	0.306771	946.8	0.174461	946.8	0.104877	946.8	0.0724975
947	0.483229	947	0.305156	947	0.167207	947	0.105167	947	0.0702756
947.2	0.479024	947.2	0.307423	947.2	0.1752	947.2	0.10948	947.2	0.070248
947.4	0.48586	947.4	0.306247	947.4	0.173949	947.4	0.108679	947.4	0.0700717
947.6	0.481229	947.6	0.304487	947.6	0.16995	947.6	0.10663	947.6	0.0706213
947.8	0.488485	947.8	0.307638	947.8	0.172488	947.8	0.106931	947.8	0.0693554
948	0.485915	948	0.309019	948	0.177048	948	0.10683	948	0.0692763
948.2	0.48795	948.2	0.305981	948.2	0.175512	948.2	0.108723	948.2	0.0625027
948.4	0.487055	948.4	0.309302	948.4	0.173503	948.4	0.110265	948.4	0.0672716
948.6	0.485922	948.6	0.304998	948.6	0.167461	948.6	0.110176	948.6	0.0671186
948.8	0.484358	948.8	0.306269	948.8	0.173514	948.8	0.108888	948.8	0.067391
949	0.484703	949	0.3067	949	0.175047	949	0.106368	949	0.0708536
949.2	0.483949	949.2	0.308788	949.2	0.172873	949.2	0.107594	949.2	0.0716594
949.4	0.482207	949.4	0.310857	949.4	0.174071	949.4	0.107157	949.4	0.0665192
949.6	0.484345	949.6	0.308006	949.6	0.173894	949.6	0.108146	949.6	0.0691089
949.8	0.485012	949.8	0.303461	949.8	0.17503	949.8	0.109328	949.8	0.0679891
950	0.485243	950	0.30484	950	0.174002	950	0.103454	950	0.0700897
950.2	0.485094	950.2	0.311962	950.2	0.177201	950.2	0.108407	950.2	0.0693236
950.4	0.486945	950.4	0.312763	950.4	0.17507	950.4	0.110972	950.4	0.0721172
950.6	0.487001	950.6	0.313953	950.6	0.174032	950.6	0.109979	950.6	0.0669817
950.8	0.484081	950.8	0.306907	950.8	0.177082	950.8	0.107534	950.8	0.0702026
951	0.485678	951	0.306938	951	0.173098	951	0.107934	951	0.0687816
951.2	0.488077	951.2	0.311415	951.2	0.176118	951.2	0.109636	951.2	0.0745809
951.4	0.485876	951.4	0.310241	951.4	0.175547	951.4	0.10846	951.4	0.0688476
951.6	0.486793	951.6	0.311034	951.6	0.176878	951.6	0.110744	951.6	0.0656744
951.8	0.48473	951.8	0.310159	951.8	0.17354	951.8	0.108973	951.8	0.0678775
952	0.487196	952	0.3127	952	0.176009	952	0.107042	952	0.0670865
952.2	0.487491	952.2	0.30982	952.2	0.177177	952.2	0.10648	952.2	0.071975
952.4	0.486717	952.4	0.307051	952.4	0.175015	952.4	0.11018	952.4	0.072788
952.6	0.489386	952.6	0.308606	952.6	0.177527	952.6	0.108506	952.6	0.0681525
952.8	0.488355	952.8	0.307407	952.8	0.173202	952.8	0.110706	952.8	0.0702182
953	0.485776	953	0.307847	953	0.174848	953	0.106617	953	0.0675707
953.2	0.488366	953.2	0.308035	953.2	0.1741	953.2	0.112999	953.2	0.0681755
953.4	0.486032	953.4	0.313254	953.4	0.173956	953.4	0.112707	953.4	0.0685196
953.6	0.484152	953.6	0.309312	953.6	0.174028	953.6	0.10727	953.6	0.0727042
953.8	0.490622	953.8	0.308764	953.8	0.176333	953.8	0.107609	953.8	0.0674928
954	0.493405	954	0.309223	954	0.17412	954	0.111684	954	0.0689849
954.2	0.489161	954.2	0.310515	954.2	0.175946	954.2	0.107559	954.2	0.0681777
954.4	0.489086	954.4	0.310194	954.4	0.179264	954.4	0.108347	954.4	0.0674995
954.6	0.490766	954.6	0.309585	954.6	0.176582	954.6	0.110886	954.6	0.067455
954.8	0.486561	954.8	0.310738	954.8	0.176436	954.8	0.111809	954.8	0.0680839
955	0.486264	955	0.314032	955	0.180959	955	0.108538	955	0.0707399
955.2	0.492839	955.2	0.31398	955.2	0.180248	955.2	0.113525	955.2	0.0711761
955.4	0.488176	955.4	0.3099	955.4	0.177562	955.4	0.108426	955.4	0.0689295
955.6	0.492974	955.6	0.308187	955.6	0.17818	955.6	0.110044	955.6	0.0716499
955.8	0.491627	955.8	0.313803	955.8	0.17521	955.8	0.112157	955.8	0.072756
956	0.490951	956	0.314267	956	0.176679	956	0.110915	956	0.069021
956.2	0.491309	956.2	0.313181	956.2	0.175984	956.2	0.11248	956.2	0.0698171
956.4	0.48661	956.4	0.309286	956.4	0.179065	956.4	0.10804	956.4	0.0687989
956.6	0.4912	956.6	0.312638	956.6	0.176975	956.6	0.109624	956.6	0.0692878
956.8	0.493711	956.8	0.314392	956.8	0.177252	956.8	0.113667	956.8	0.0689723
957	0.493663	957	0.313629	957	0.177595	957	0.11298	957	0.0682105
957.2	0.491275	957.2	0.314051	957.2	0.177691	957.2	0.109543	957.2	0.0690962
957.4	0.493505	957.4	0.314294	957.4	0.177917	957.4	0.109268	957.4	0.0679
957.6	0.489807	957.6	0.312562	957.6	0.173518	957.6	0.1072	957.6	0.0711403
957.8	0.494375	957.8	0.312143	957.8	0.178072	957.8	0.109327	957.8	0.0694206
958	0.49146	958	0.314287	958	0.17754	958	0.108357	958	0.0689532
958.2	0.494177	958.2	0.307666	958.2	0.175006	958.2	0.110868	958.2	0.0709386
958.4	0.492435	958.4	0.314801	958.4	0.178452	958.4	0.111223	958.4	0.0743189
958.6	0.490519	958.6	0.312762	958.6	0.177763	958.6	0.108212	958.6	0.0669211
958.8	0.493903	958.8	0.308492	958.8	0.180169	958.8	0.109374	958.8	0.0705163
959	0.493296	959	0.31184	959	0.176943	959	0.108513	959	0.0709705
959.2	0.494143	959.2	0.307424	959.2	0.177582	959.2	0.109077	959.2	0.0732272
959.4	0.490986	959.4	0.31155	959.4	0.176654	959.4	0.112504	959.4	0.0689194
959.6	0.494081	959.6	0.312487	959.6	0.177697	959.6	0.103273	959.6	0.068664
959.8	0.495903	959.8	0.31217	959.8	0.179016	959.8	0.113386	959.8	0.0721515
960	0.495785	960	0.316126	960	0.178389	960	0.112568	960	0.0725077
960.2	0.496725	960.2	0.310757	960.2	0.177682	960.2	0.109558	960.2	0.0680585
960.4	0.494307	960.4	0.312956	960.4	0.176001	960.4	0.115354	960.4	0.0734945
960.6	0.493718	960.6	0.314848	960.6	0.181013	960.6	0.110706	960.6	0.0681892
960.8	0.494688	960.8	0.311124	960.8	0.179126	960.8	0.110285	960.8	0.0721896
961	0.489574	961	0.308778	961	0.176987	961	0.109867	961	0.0688115
961.2	0.497103	961.2	0.31538	961.2	0.17268	961.2	0.111132	961.2	0.0699787
961.4	0.495787	961.4	0.31524	961.4	0.178717	961.4	0.114484	961.4	0.0736649
961.6	0.497106	961.6	0.312465	961.6	0.180882	961.6	0.114011	961.6	0.0711284
961.8	0.495026	961.8	0.313386	961.8	0.178132	961.8	0.11128	961.8	0.0722971
962	0.494929	962	0.313449	962	0.178082	962	0.108322	962	0.0697105
962.2	0.496503	962.2	0.314313	962.2	0.176458	962.2	0.108887	962.2	0.0679132
962.4	0.497933	962.4	0.318774	962.4	0.17765	962.4	0.111567	962.4	0.0722873
962.6	0.493231	962.6	0.316109	962.6	0.18027	962.6	0.115178	962.6	0.071432
962.8	0.492915	962.8	0.312565	962.8	0.176634	962.8	0.111902	962.8	0.0738026
963	0.496427	963	0.315572	963	0.179837	963	0.11119	963	0.0721062
963.2	0.496087	963.2	0.315307	963.2	0.178109	963.2	0.11149	963.2	0.0677134
963.4	0.498015	963.4	0.316054	963.4	0.179616	963.4	0.113188	963.4	0.0730589
963.6	0.496236	963.6	0.317461	963.6	0.177123	963.6	0.109459	963.6	0.0703779
963.8	0.500423	963.8	0.314874	963.8	0.1814	963.8	0.109181	963.8	0.0685311
964	0.498189	964	0.31727	964	0.175969	964	0.112025	964	0.0724604
964.2	0.498851	964.2	0.31532	964.2	0.179231	964.2	0.10974	964.2	0.0680434
964.4	0.501606	964.4	0.31524	964.4	0.181286	964.4	0.108801	964.4	0.0734864
964.6	0.499237	964.6	0.313389	964.6	0.180358	964.6	0.112624	964.6	0.0722314
964.8	0.499703	964.8	0.318579	964.8	0.176834	964.8	0.111134	964.8	0.0708732
965	0.499067	965	0.313058	965	0.179291	965	0.109359	965	0.0711294
965.2	0.49559	965.2	0.314247	965.2	0.179583	965.2	0.113617	965.2	0.0701947
965.4	0.504084	965.4	0.318699	965.4	0.180981	965.4	0.109069	965.4	0.0713886
965.6	0.501759	965.6	0.312533	965.6	0.176445	965.6	0.112103	965.6	0.0715584
965.8	0.497837	965.8	0.320544	965.8	0.179996	965.8	0.113187	965.8	0.0752628
966	0.498554	966	0.31557	966	0.179485	966	0.112961	966	0.0678157
966.2	0.499287	966.2	0.31682	966.2	0.180447	966.2	0.115516	966.2	0.076199
966.4	0.50049	966.4	0.321234	966.4	0.183236	966.4	0.111206	966.4	0.073901
966.6	0.501514	966.6	0.318134	966.6	0.179991	966.6	0.112759	966.6	0.0716656
966.8	0.498542	966.8	0.318814	966.8	0.180727	966.8	0.10697	966.8	0.0720485
967	0.496882	967	0.319834	967	0.18084	967	0.111052	967	0.0674317
967.2	0.499288	967.2	0.315796	967.2	0.180973	967.2	0.114991	967.2	0.0717285
967.4	0.498494	967.4	0.317426	967.4	0.181405	967.4	0.108506	967.4	0.0678273
967.6	0.49845	967.6	0.31957	967.6	0.178066	967.6	0.110626	967.6	0.0703645
967.8	0.500613	967.8	0.313037	967.8	0.178654	967.8	0.114989	967.8	0.0720116
968	0.501949	968	0.318473	968	0.179413	968	0.111255	968	0.0735958
968.2	0.501539	968.2	0.321792	968.2	0.178552	968.2	0.1106	968.2	0.0737705
968.4	0.502084	968.4	0.316988	968.4	0.179266	968.4	0.113694	968.4	0.0719916
968.6	0.494254	968.6	0.318845	968.6	0.180547	968.6	0.112157	968.6	0.0664515
968.8	0.502094	968.8	0.318939	968.8	0.181896	968.8	0.111559	968.8	0.0717279
969	0.498101	969	0.317868	969	0.180342	969	0.116517	969	0.0733267
969.2	0.505275	969.2	0.322128	969.2	0.182369	969.2	0.110881	969.2	0.0737859
969.4	0.502713	969.4	0.322646	969.4	0.180877	969.4	0.111613	969.4	0.0734199
969.6	0.504693	969.6	0.319207	969.6	0.180751	969.6	0.11076	969.6	0.0701274
969.8	0.504731	969.8	0.318509	969.8	0.179916	969.8	0.108412	969.8	0.0705574
970	0.501606	970	0.322354	970	0.182398	970	0.111879	970	0.0715664
970.2	0.502986	970.2	0.322333	970.2	0.18057	970.2	0.117092	970.2	0.071369
970.4	0.506488	970.4	0.317433	970.4	0.187051	970.4	0.113268	970.4	0.0748621
970.6	0.503938	970.6	0.318819	970.6	0.176703	970.6	0.115216	970.6	0.0720366
970.8	0.500938	970.8	0.318822	970.8	0.18128	970.8	0.112199	970.8	0.0667576
971	0.505365	971	0.319123	971	0.181919	971	0.112135	971	0.0745584
971.2	0.506183	971.2	0.318602	971.2	0.181421	971.2	0.111069	971.2	0.0709339
971.4	0.507364	971.4	0.315487	971.4	0.173938	971.4	0.112154	971.4	0.0720189
971.6	0.503478	971.6	0.319265	971.6	0.181398	971.6	0.114759	971.6	0.0705056
971.8	0.506491	971.8	0.32133	971.8	0.183438	971.8	0.111805	971.8	0.0730986
972	0.506686	972	0.321706	972	0.181482	972	0.111972	972	0.0727663
972.2	0.502062	972.2	0.322086	972.2	0.181343	972.2	0.112887	972.2	0.0714251
972.4	0.502882	972.4	0.322388	972.4	0.18282	972.4	0.110338	972.4	0.075575
972.6	0.506627	972.6	0.317487	972.6	0.179143	972.6	0.114304	972.6	0.0656808
972.8	0.503362	972.8	0.318779	972.8	0.180682	972.8	0.113138	972.8	0.0731685
973	0.50549	973	0.32299	973	0.183633	973	0.116657	973	0.0728526
973.2	0.506416	973.2	0.323346	973.2	0.181855	973.2	0.112922	973.2	0.07535
973.4	0.50517	973.4	0.322187	973.4	0.181068	973.4	0.114013	973.4	0.0728119
973.6	0.507081	973.6	0.320685	973.6	0.182175	973.6	0.112651	973.6	0.0691488
973.8	0.509781	973.8	0.321114	973.8	0.180973	973.8	0.110574	973.8	0.0732643
974	0.508214	974	0.31959	974	0.185808	974	0.109912	974	0.0704585
974.2	0.504016	974.2	0.322291	974.2	0.185843	974.2	0.112193	974.2	0.0706917
974.4	0.507164	974.4	0.323601	974.4	0.180292	974.4	0.112626	974.4	0.0746092
974.6	0.508071	974.6	0.324344	974.6	0.179065	974.6	0.112823	974.6	0.0729598
974.8	0.509943	974.8	0.322157	974.8	0.182189	974.8	0.112313	974.8	0.074839
975	0.504943	975	0.323224	975	0.182256	975	0.114414	975	0.0742789
975.2	0.505482	975.2	0.32232	975.2	0.183703	975.2	0.113725	975.2	0.0715392
975.4	0.507466	975.4	0.321728	975.4	0.179187	975.4	0.118857	975.4	0.0787055
975.6	0.509325	975.6	0.320165	975.6	0.185099	975.6	0.113793	975.6	0.0772302
975.8	0.5077	975.8	0.321682	975.8	0.181115	975.8	0.112171	975.8	0.0741522
976	0.509104	976	0.325604	976	0.187352	976	0.117677	976	0.0740904
976.2	0.508792	976.2	0.324055	976.2	0.180431	976.2	0.111187	976.2	0.0760066
976.4	0.507199	976.4	0.326316	976.4	0.185076	976.4	0.11536	976.4	0.0727202
976.6	0.512444	976.6	0.321828	976.6	0.182965	976.6	0.114303	976.6	0.0750295
976.8	0.506031	976.8	0.325533	976.8	0.185773	976.8	0.11548	976.8	0.0706513
977	0.504813	977	0.322241	977	0.18128	977	0.11348	977	0.0732877
977.2	0.509517	977.2	0.322932	977.2	0.181292	977.2	0.111331	977.2	0.0730384
977.4	0.5098	977.4	0.323768	977.4	0.183264	977.4	0.112218	977.4	0.0738225
977.6	0.508564	977.6	0.323194	977.6	0.180958	977.6	0.115084	977.6	0.075707
977.8	0.507432	977.8	0.320308	977.8	0.184051	977.8	0.116613	977.8	0.0717182
978	0.512172	978	0.322462	978	0.184522	978	0.114289	978	0.0737062
978.2	0.508124	978.2	0.323466	978.2	0.179855	978.2	0.112148	978.2	0.0721189
978.4	0.511624	978.4	0.320776	978.4	0.180921	978.4	0.115644	978.4	0.0752096
978.6	0.505928	978.6	0.326191	978.6	0.184467	978.6	0.115631	978.6	0.0730083
978.8	0.515274	978.8	0.323897	978.8	0.17993	978.8	0.117579	978.8	0.0752998
979	0.510665	979	0.323002	979	0.185348	979	0.114348	979	0.0788774
979.2	0.510933	979.2	0.325817	979.2	0.183469	979.2	0.112212	979.2	0.0699382
979.4	0.511221	979.4	0.325147	979.4	0.182907	979.4	0.114241	979.4	0.0745627
979.6	0.509674	979.6	0.323577	979.6	0.183945	979.6	0.113536	979.6	0.0710557
979.8	0.511229	979.8	0.323577	979.8	0.181648	979.8	0.116068	979.8	0.0754384
980	0.51303	980	0.32438	980	0.183685	980	0.111578	980	0.0712812
980.2	0.511372	980.2	0.323304	980.2	0.182996	980.2	0.115169	980.2	0.0715062
980.4	0.511705	980.4	0.324566	980.4	0.186011	980.4	0.117442	980.4	0.0711513
980.6	0.513637	980.6	0.325328	980.6	0.186371	980.6	0.112057	980.6	0.074353
980.8	0.512724	980.8	0.327289	980.8	0.183535	980.8	0.11294	980.8	0.0730286
981	0.511694	981	0.325613	981	0.183193	981	0.113943	981	0.0755731
981.2	0.512164	981.2	0.326227	981.2	0.184813	981.2	0.11407	981.2	0.0732747
981.4	0.511774	981.4	0.321819	981.4	0.184265	981.4	0.113427	981.4	0.0753955
981.6	0.515472	981.6	0.324393	981.6	0.184217	981.6	0.110488	981.6	0.0715586
981.8	0.513801	981.8	0.320746	981.8	0.184759	981.8	0.116167	981.8	0.0761369
982	0.512469	982	0.323115	982	0.186317	982	0.116451	982	0.0735255
982.2	0.513747	982.2	0.325833	982.2	0.182735	982.2	0.118516	982.2	0.0755473
982.4	0.509015	982.4	0.326012	982.4	0.18376	982.4	0.114271	982.4	0.0715188
982.6	0.515006	982.6	0.326196	982.6	0.185407	982.6	0.114332	982.6	0.0715097
982.8	0.511444	982.8	0.326755	982.8	0.189127	982.8	0.115033	982.8	0.0781201
983	0.512976	983	0.322877	983	0.183493	983	0.116117	983	0.0720718
983.2	0.510291	983.2	0.325706	983.2	0.184843	983.2	0.113884	983.2	0.0711073
983.4	0.511661	983.4	0.331047	983.4	0.185538	983.4	0.114812	983.4	0.0736132
983.6	0.511505	983.6	0.324546	983.6	0.183097	983.6	0.11454	983.6	0.074931
983.8	0.5146	983.8	0.32692	983.8	0.187765	983.8	0.117596	983.8	0.0743378
984	0.515274	984	0.329432	984	0.187736	984	0.112421	984	0.0751406
984.2	0.517881	984.2	0.325971	984.2	0.187767	984.2	0.115417	984.2	0.0746206
984.4	0.511598	984.4	0.328111	984.4	0.188757	984.4	0.115158	984.4	0.0759512
984.6	0.508818	984.6	0.32829	984.6	0.184508	984.6	0.114757	984.6	0.0738833
984.8	0.517067	984.8	0.325267	984.8	0.184627	984.8	0.114424	984.8	0.0718865
985	0.512957	985	0.330384	985	0.184221	985	0.119121	985	0.0756596
985.2	0.515309	985.2	0.328327	985.2	0.184742	985.2	0.116693	985.2	0.0725389
985.4	0.516358	985.4	0.329034	985.4	0.180652	985.4	0.116728	985.4	0.0705035
985.6	0.512257	985.6	0.324992	985.6	0.185434	985.6	0.116131	985.6	0.070071
985.8	0.514071	985.8	0.327973	985.8	0.18447	985.8	0.117033	985.8	0.0761495
986	0.514418	986	0.331488	986	0.186563	986	0.115236	986	0.0725178
986.2	0.512026	986.2	0.325295	986.2	0.184121	986.2	0.112581	986.2	0.0773127
986.4	0.514359	986.4	0.330547	986.4	0.185726	986.4	0.112184	986.4	0.0722991
986.6	0.51558	986.6	0.325804	986.6	0.187874	986.6	0.115269	986.6	0.0768087
986.8	0.513625	986.8	0.326048	986.8	0.186997	986.8	0.118297	986.8	0.0760363
987	0.515233	987	0.327103	987	0.186153	987	0.116159	987	0.0728184
987.2	0.518978	987.2	0.330666	987.2	0.184441	987.2	0.117281	987.2	0.0723576
987.4	0.516493	987.4	0.328378	987.4	0.184951	987.4	0.114882	987.4	0.0769378
987.6	0.515434	987.6	0.329226	987.6	0.188536	987.6	0.113057	987.6	0.0751931
987.8	0.519624	987.8	0.328717	987.8	0.1859	987.8	0.116558	987.8	0.0762743
988	0.520493	988	0.327646	988	0.189105	988	0.113398	988	0.0772367
988.2	0.5166	988.2	0.325781	988.2	0.185112	988.2	0.11796	988.2	0.0774839
988.4	0.519212	988.4	0.328103	988.4	0.185257	988.4	0.119473	988.4	0.0743731
988.6	0.517233	988.6	0.326177	988.6	0.187395	988.6	0.117473	988.6	0.072469
988.8	0.518237	988.8	0.332974	988.8	0.18726	988.8	0.115014	988.8	0.0764102
989	0.520787	989	0.329332	989	0.185993	989	0.115102	989	0.0760423
989.2	0.518154	989.2	0.330474	989.2	0.184674	989.2	0.118008	989.2	0.0749863
989.4	0.516035	989.4	0.325888	989.4	0.186557	989.4	0.116155	989.4	0.0765369
989.6	0.522644	989.6	0.32866	989.6	0.184391	989.6	0.116729	989.6	0.0780896
989.8	0.52095	989.8	0.329023	989.8	0.184357	989.8	0.114991	989.8	0.0725052
990	0.516776	990	0.332456	990	0.189731	990	0.116633	990	0.0729821
990.2	0.515776	990.2	0.329372	990.2	0.188112	990.2	0.115575	990.2	0.071478
990.4	0.515726	990.4	0.330034	990.4	0.18769	990.4	0.122971	990.4	0.0768475
990.6	0.517993	990.6	0.329487	990.6	0.186164	990.6	0.115226	990.6	0.0727504
990.8	0.515725	990.8	0.330374	990.8	0.187083	990.8	0.115547	990.8	0.072359
991	0.519605	991	0.331317	991	0.186656	991	0.116671	991	0.0753932
991.2	0.518197	991.2	0.331925	991.2	0.186847	991.2	0.117594	991.2	0.0717406
991.4	0.520311	991.4	0.331871	991.4	0.186172	991.4	0.116106	991.4	0.0734249
991.6	0.52085	991.6	0.331063	991.6	0.189369	991.6	0.117366	991.6	0.075996
991.8	0.522301	991.8	0.325903	991.8	0.188943	991.8	0.117965	991.8	0.0745563
992	0.517531	992	0.33041	992	0.186736	992	0.117949	992	0.0782884
992.2	0.519899	992.2	0.33309	992.2	0.18534	992.2	0.114416	992.2	0.0769088
992.4	0.519441	992.4	0.329021	992.4	0.186468	992.4	0.115751	992.4	0.0792437
992.6	0.519861	992.6	0.332325	992.6	0.18639	992.6	0.116351	992.6	0.0786856
992.8	0.524726	992.8	0.331807	992.8	0.184923	992.8	0.115611	992.8	0.075163
993	0.517842	993	0.329916	993	0.184557	993	0.118286	993	0.0788662
993.2	0.518294	993.2	0.329603	993.2	0.188412	993.2	0.11894	993.2	0.07602
993.4	0.522756	993.4	0.337851	993.4	0.190169	993.4	0.117534	993.4	0.0732504
993.6	0.527391	993.6	0.33405	993.6	0.189745	993.6	0.114323	993.6	0.0786605
993.8	0.524385	993.8	0.334225	993.8	0.191598	993.8	0.117223	993.8	0.0746497
994	0.521652	994	0.331852	994	0.188724	994	0.117911	994	0.0742552
994.2	0.523066	994.2	0.333062	994.2	0.188925	994.2	0.119484	994.2	0.0771913
994.4	0.519637	994.4	0.328165	994.4	0.188779	994.4	0.117486	994.4	0.0730521
994.6	0.519765	994.6	0.333627	994.6	0.187104	994.6	0.115321	994.6	0.0727815
994.8	0.520426	994.8	0.333955	994.8	0.189045	994.8	0.117185	994.8	0.0738546
995	0.519503	995	0.335902	995	0.188925	995	0.118141	995	0.0787721
995.2	0.521578	995.2	0.333259	995.2	0.190529	995.2	0.116624	995.2	0.075396
995.4	0.522945	995.4	0.332531	995.4	0.18981	995.4	0.114963	995.4	0.0756754
995.6	0.522259	995.6	0.333918	995.6	0.188258	995.6	0.120554	995.6	0.0759782
995.8	0.525359	995.8	0.33305	995.8	0.190663	995.8	0.11619	995.8	0.0754815
996	0.528238	996	0.333435	996	0.189291	996	0.117687	996	0.0738885
996.2	0.523905	996.2	0.333891	996.2	0.191701	996.2	0.120454	996.2	0.0773935
996.4	0.522667	996.4	0.329493	996.4	0.186823	996.4	0.117849	996.4	0.0735752
996.6	0.525783	996.6	0.338423	996.6	0.188609	996.6	0.118172	996.6	0.0735886
996.8	0.524444	996.8	0.33013	996.8	0.192349	996.8	0.118443	996.8	0.0755384
997	0.52451	997	0.330031	997	0.189237	997	0.115969	997	0.0765185
997.2	0.523984	997.2	0.331116	997.2	0.188805	997.2	0.116194	997.2	0.0735517
997.4	0.522197	997.4	0.332717	997.4	0.190707	997.4	0.117648	997.4	0.0753251
997.6	0.525677	997.6	0.334924	997.6	0.190927	997.6	0.117886	997.6	0.0729709
997.8	0.525944	997.8	0.332914	997.8	0.190796	997.8	0.120467	997.8	0.0703865
998	0.528578	998	0.332943	998	0.186836	998	0.116683	998	0.0741506
998.2	0.530483	998.2	0.330092	998.2	0.192708	998.2	0.11505	998.2	0.0747316
998.4	0.526891	998.4	0.333579	998.4	0.192413	998.4	0.117786	998.4	0.0780288
998.6	0.523302	998.6	0.335468	998.6	0.190246	998.6	0.114944	998.6	0.0772813
998.8	0.528465	998.8	0.334537	998.8	0.188958	998.8	0.120634	998.8	0.0748975
999	0.522815	999	0.33381	999	0.19113	999	0.11819	999	0.0764267
999.2	0.525308	999.2	0.333012	999.2	0.191854	999.2	0.120487	999.2	0.074835
[truncated: 8,003 more rows]
