# Supplementary material for: Defining the function of OmpA in the Rcs stress response
Source: eLife journal article supplement (doi:10.7554/elife.60861), 2020-09-28
Supplement: supp [file elife-60861-supp-v1.zip › elife_poa_e60861_Figure_6_figure_supplement_1_source_data_1.xlsx]

## Sheet: Feuil1
LB	[Polymixin B] (µg/mL)	OD600	Vmax		Average	SD
WT	0	0.66	0.00156	118.182
WT	0	0.6	0.00172	143.333
WT	0	0.59	0.00169	143.22	134.912	14.4887
WT	0.0001	0.615	0.002213	179.919
WT	0.0001	0.6	0.002188	182.333
WT	0.0001	0.62	0.002107	169.919	177.39	6.58185
WT	0.001	0.75	0.002228	148.533
WT	0.001	0.74	0.002139	144.527
WT	0.001	0.76	0.002531	166.513	153.191	11.7098
WT	0.01	0.7	0.002201	157.214
WT	0.01	0.71	0.002203	155.141
WT	0.01	0.72	0.002038	141.528	151.294	8.52136
WT	0.5	0.61	0.0362	2967.21
WT	0.5	0.6	0.0373	3108.33
WT	0.5	0.62	0.0374	3016.13	3030.56	71.6581
∆ompA	0	0.74	0.002398	162.027
∆ompA	0	0.75	0.002943	196.2
∆ompA	0	0.73	0.003146	215.479	191.235	27.0698
∆ompA	0.0001	0.58	0.003497	301.466
∆ompA	0.0001	0.57	0.004645	407.456
∆ompA	0.0001	0.57	0.004081	357.982	355.635	53.0343
∆ompA	0.001	0.74	0.003727	251.824
∆ompA	0.001	0.73	0.003698	253.288
∆ompA	0.001	0.75	0.006801	453.4	319.504	115.96
∆ompA	0.01	0.63	0.006075	482.143
∆ompA	0.01	0.64	0.006879	537.422
∆ompA	0.01	0.63	0.007069	561.032	526.865	40.49
∆ompA	0.5	0.58	0.04	3448.28
∆ompA	0.5	0.56	0.0374	3339.29
∆ompA	0.5	0.57	0.0436	3824.56	3537.37	254.612
pvalue	WT/WT0,5		pvalue	WT0,5/ompA0,5	0.0654249		WT/∆ompA	0.0488646
	WT/∆ompA			∆ompA0,01/0,001	0.0772342
	WT/∆ompA 0,5			∆ompA0,001/0,0001	0.59035
	WT0,5/∆ompA			∆ompA0,0001/C-	0.0177051
	WT0,5/∆ompA 0,5
	ΔompA/ΔompA 0.5			WT0,01/0,001	0.832647
				WT0,001/0,0001	0.832647
				WT0,0001/C-	0.0222701
