# Supplementary material for: Defining the function of OmpA in the Rcs stress response
Source: eLife journal article supplement (doi:10.7554/elife.60861), 2020-09-28
Supplement: supp [file elife-60861-supp-v1.zip › elife_poa_e60861_Figure_6_figure_supplement_2.pdf]

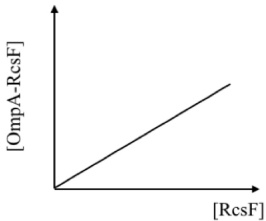

$$[OmpA - RcsF] = \frac{C [RcsF]}{K_d^{OmpA-RcsF}}$$

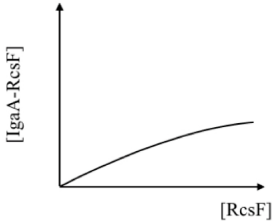

$$[IgaA - RcsF] = \frac{\frac{C [RcsF]}{K_d^{OmpA-RcsF}}}{C/K_d^{ratio} + \frac{C [RcsF]}{K_d^{OmpA-RcsF}}}$$
