# Supplementary figures and images for: Defining the function of OmpA in the Rcs stress response
Source: eLife journal article supplement (doi:10.7554/elife.60861), 2020-09-28

A

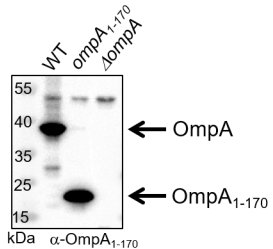

B

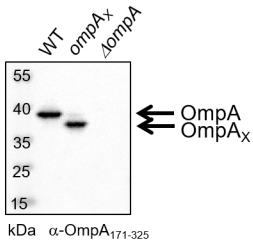

C

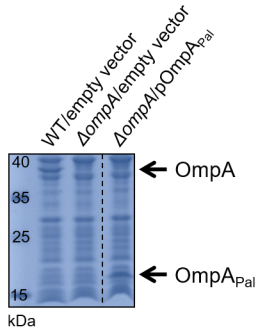

Supplement: supp [file elife-60861-supp-v1.zip]

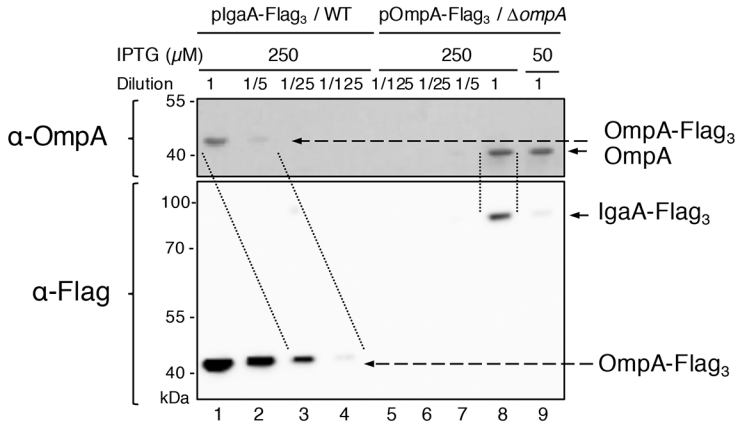

Supplement: supp [file elife-60861-supp-v1.zip]

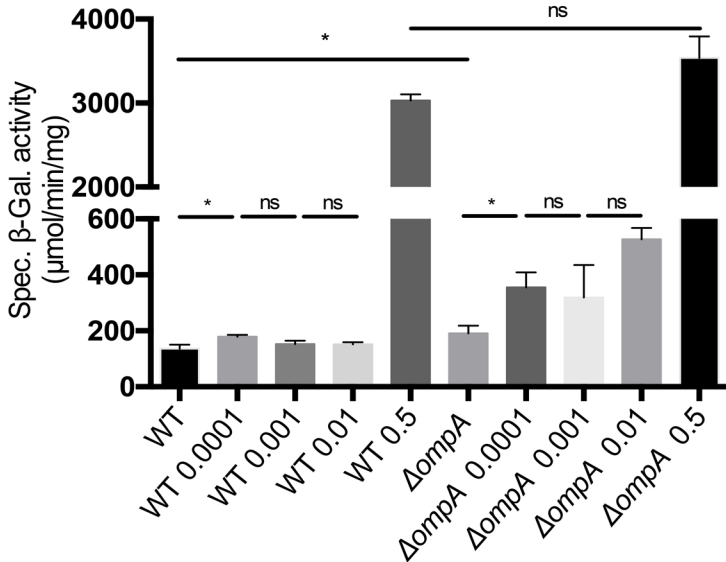

Supplement: supp [file elife-60861-supp-v1.zip]

DiZPK position

K98

E110

UV

-

+

-

+

*ompA*

+

-

+

-

+

-

+

-

OmpA-RcsF →

70

55

35

25

RcsF →

15

kDa

$\alpha$ -RcsF

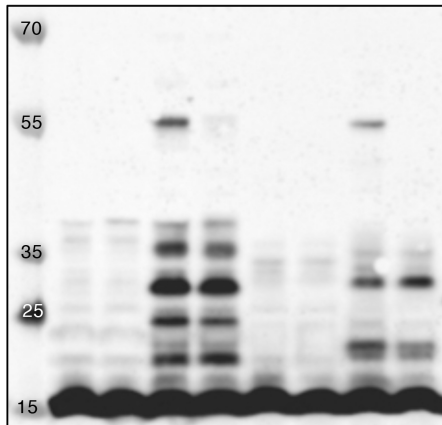

Supplement: supp [file elife-60861-supp-v1.zip]

DiZPK position

R89

UV

+

-

*ompA*

+

+

-

+

+

-

*ompR*

+

-

+

+

-

+

OmpC/F-RcsF  
OmpA-RcsF

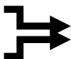

- 130

- 100

- 70

- 55

- 40

- 35

- 25

- 15

RcsF

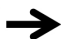 $\alpha$ -RcsF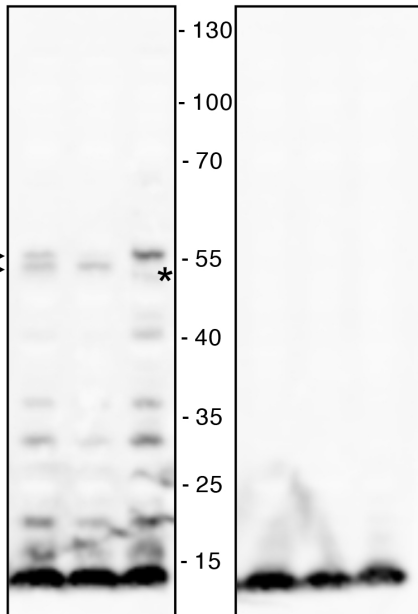

Supplement: supp [file elife-60861-supp-v1.zip › elife_poa_e60861_Figure_1_figure_supplement_2.pdf]

A

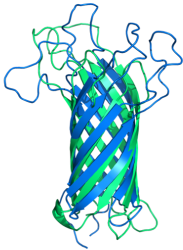

B

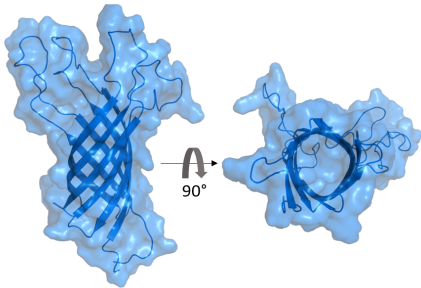

Supplement: supp [file elife-60861-supp-v1.zip › elife_poa_e60861_Figure_3_figure_supplement_1.pdf]
